# Supplementary material for: Self-assembly patterns of non-metalloid silver thiolates: structural, HR-ESI-MS and stability studies
Source: Royal Society of Chemistry journal article supplement (doi:10.1039/d1dt02398e), 2021-11-23
Supplement: d1dt02398e1.pdf [file d1dt02398e1.pdf]

# Self-assembly patterns of non-metalloid silver thiolates: structural, HR-ESI-MS and stability studies

Anastasia V. Chupina,<sup>a</sup> Vadim V. Yanshole,<sup>b,c</sup> Veronica S. Sulyaeva,<sup>a</sup> Vasily V. Kokovkin,<sup>a</sup> Pavel A. Abramov,<sup>\*a</sup> Maxim N. Sokolov<sup>a</sup>

<sup>a</sup> Nikolaev Institute of Inorganic Chemistry SB RAS, 3 Akad. Lavrentiev Ave., 630090 Novosibirsk, Russia;

<sup>b</sup> Novosibirsk State University, 2 Pirogova Ave., 630090 Novosibirsk, Russia;

<sup>c</sup> International Tomography Center, Institutskaya str. 3a, 630090, Novosibirsk, Russia;

## Supporting information

### Table of contents

|                                                                                                                                                                                     |    |
|-------------------------------------------------------------------------------------------------------------------------------------------------------------------------------------|----|
| Synthesis.....                                                                                                                                                                      | 4  |
| Structural data.....                                                                                                                                                                | 5  |
| <b>Table S1.</b> Experimental details.....                                                                                                                                          | 6  |
| <b>Table S2.</b> Selected geometric parameters (Å).....                                                                                                                             | 7  |
| <b>Fig. S1.</b> The position of NO <sub>3</sub> <sup>-</sup> inside {Ag <sub>20</sub> (tBuS) <sub>10</sub> } cluster core in the crystal structure of <b>1</b> .....                | 10 |
| <b>Fig. S2.</b> The capping and central NO <sub>3</sub> <sup>-</sup> anions inside {Ag <sub>20</sub> (tBuS) <sub>10</sub> } cluster core in the crystal structure of <b>1</b> ..... | 11 |
| <b>Fig. S3.</b> The cluster chain fragment in the crystal structure of <b>1</b> .....                                                                                               | 12 |
| <b>Fig. S4.</b> Disordering of the bridged NO <sub>3</sub> <sup>-</sup> in the crystal structure of <b>1</b> .....                                                                  | 13 |
| <b>Fig. S5.</b> The FT-IR spectrum of <b>1</b> .....                                                                                                                                | 14 |
| <b>Fig. S6.</b> The capping and central NO <sub>3</sub> <sup>-</sup> anions inside {Ag <sub>19</sub> (tBuS) <sub>10</sub> } cluster core in the crystal structure of <b>2</b> ..... | 15 |
| <b>Fig. S7.</b> The capping and central NO <sub>3</sub> <sup>-</sup> anions inside {Ag <sub>20</sub> (tBuS) <sub>10</sub> } cluster core in the crystal structure of <b>2</b> ..... | 16 |
| <b>Fig. S8.</b> The crystal packing of <b>2</b> .....                                                                                                                               | 17 |
| <b>Fig. S9.</b> Crystal packing of <b>3</b> . View along crystal axes <i>a</i> .....                                                                                                | 18 |
| <b>Fig. S10.</b> Crystal packing of <b>3</b> . View along crystal axes <i>c</i> .....                                                                                               | 19 |
| HR-ESI-MS data.....                                                                                                                                                                 | 20 |
| <b>Fig. S11.</b> Full HR-ESI-MS(-) spectrum of <b>1</b> in CH <sub>3</sub> CN solution.....                                                                                         | 20 |
| <b>Table S3.</b> Peak assignment for the spectrum of <b>1</b> presented in Fig. S11.....                                                                                            | 21 |
| <b>Fig. S12.</b> The comparison of observed and calculated isotopic patterns for the spectrum of <b>1</b> presented in Fig. S11.<br>.....                                           | 22 |
| <b>Fig. S13.</b> Full HR-ESI-MS(+) spectrum of <b>1</b> in CH <sub>3</sub> CN solution.....                                                                                         | 24 |
| <b>Table S4.</b> Peak assignment for the spectrum of <b>1</b> presented in Fig. S13.....                                                                                            | 24 |
| <b>Fig. S14.</b> The comparison of observed and calculated isotopic patterns for the spectrum of <b>1</b> presented in Fig. S13.<br>.....                                           | 25 |
| <b>Fig. S15.</b> Full HR-ESI-MS(+) spectrum of <b>1</b> in CH <sub>3</sub> CN solution after some period of time.....                                                               | 26 |
| <b>Table S5.</b> Peak assignment for the spectrum of <b>1</b> presented in Fig. S15.....                                                                                            | 26 |

|                                                                                                                                                                                                                      |    |
|----------------------------------------------------------------------------------------------------------------------------------------------------------------------------------------------------------------------|----|
| <b>Fig. S16.</b> The comparison of observed and calculated isotopic patterns for the spectrum of <b>1</b> presented in Fig. S15.                                                                                     | 26 |
| <b>Fig. S17.</b> Full HR-ESI-MS(-) spectrum of <b>2</b> in CH <sub>3</sub> CN solution.                                                                                                                              | 27 |
| <b>Fig. S18.</b> The comparison of observed and calculated isotopic patterns for the spectrum of <b>2</b> presented in Fig. S17.                                                                                     | 29 |
| <b>Fig. S19.</b> Full HR-ESI-MS(+) spectrum of <b>2</b> in CH <sub>3</sub> CN solution.                                                                                                                              | 30 |
| <b>Table S7.</b> Peak assignment for the spectrum of <b>2</b> presented in Fig. S19.                                                                                                                                 | 30 |
| <b>Fig. S20.</b> The comparison of observed and calculated isotopic patterns for the spectrum of <b>2</b> presented in Fig. S19.                                                                                     | 31 |
| <b>Fig. S21.</b> Full HR-ESI-MS(+) spectrum of <b>2</b> in CH <sub>3</sub> CN solution after some period of time.                                                                                                    | 32 |
| <b>Table S8.</b> Peak assignment for the spectrum of <b>2</b> presented in Fig. S21.                                                                                                                                 | 32 |
| <b>Fig. S22.</b> The comparison of observed and calculated isotopic patterns for the spectrum of <b>2</b> presented in Fig. S21.                                                                                     | 32 |
| <b>Fig. S23.</b> Full HR-ESI-MS(-) spectrum of <b>3</b> in CH <sub>3</sub> CN solution.                                                                                                                              | 33 |
| <b>Table S9.</b> Peak assignment for the spectrum of <b>3</b> presented in Fig. S23.                                                                                                                                 | 34 |
| <b>Fig. S24.</b> The comparison of observed and calculated isotopic patterns for the spectrum of <b>3</b> presented in Fig. S23.                                                                                     | 35 |
| <b>Fig. S25.</b> Full HR-ESI-MS(+) spectrum of <b>3</b> in CH <sub>3</sub> CN solution.                                                                                                                              | 36 |
| <b>Table S10.</b> Peak assignment for the spectrum of <b>3</b> presented in Fig. S25.                                                                                                                                | 37 |
| <b>Fig. S26.</b> The comparison of observed and calculated isotopic patterns for the spectrum of <b>3</b> presented in Fig. S25.                                                                                     | 37 |
| <b>Fig. S27.</b> Full HR-ESI-MS(+) spectrum of <b>3</b> in CH <sub>3</sub> CN solution after some period of time.                                                                                                    | 39 |
| <b>Table S11.</b> Peak assignment for the spectrum of <b>3</b> presented in Fig. S27.                                                                                                                                | 39 |
| <b>Fig. S28.</b> The comparison of observed and calculated isotopic patterns for the spectrum of <b>3</b> presented in Fig. S27.                                                                                     | 40 |
| <b>Fig. S29.</b> Linear potential sweep (LRS) in the cathode region with <b>m-Ag<sub>2</sub>S</b> material fixed on the surface (1), Ag <sub>2</sub> S (2), blank 0.5 M H <sub>2</sub> SO <sub>4</sub> solution (3). | 41 |
| Degradation                                                                                                                                                                                                          | 42 |
| <b>Fig. S30.</b> XRPD of <b>m-Ag<sub>2</sub>S</b> .                                                                                                                                                                  | 42 |
| <b>Fig. S31.</b> XRPD patterns of <b>m-Ag<sub>2</sub>S</b> (red), AgNO <sub>3</sub> (blue) and holder (green).                                                                                                       | 42 |
| <b>Fig. S32.</b> The comparison of FTIR spectra during the decomposition of <b>3</b> .                                                                                                                               | 43 |
| <b>Fig. S33.</b> The degradation of <b>3</b> in KBr pellet monitoring with FTIR.                                                                                                                                     | 44 |
| <b>Fig. S34.</b> The degradation of <b>3</b> in KBr pellet monitoring with FTIR (zoom 1800 – 1000 cm <sup>-1</sup> ).                                                                                                | 44 |
| Microscopy                                                                                                                                                                                                           | 45 |
| <b>Fig. S35.</b> SEM-image of <b>m-Ag<sub>2</sub>S</b> sample surface morphology.                                                                                                                                    | 45 |
| <b>Fig. S36.</b> Energy dispersive spectra for sample presented in Fig. S35.                                                                                                                                         | 46 |
| <b>Fig. S37.</b> EDX-mapping of the sample from Fig. S35.                                                                                                                                                            | 47 |
| <b>Table S12.</b> Elemental composition of the sample.                                                                                                                                                               | 47 |
| <b>Fig. S38.</b> EDX-mapping of the <b>m-Ag<sub>2</sub>S-cat</b> sample from Fig. 7b.                                                                                                                                | 48 |
| <b>Table S13.</b> Elemental composition of the sample from Fig. 7b.                                                                                                                                                  | 48 |

|                                                                                            |    |
|--------------------------------------------------------------------------------------------|----|
| <b>Fig. S39.</b> EDX-mapping of the <b>m-Ag<sub>2</sub>S-cat</b> sample from Fig. 7c. .... | 49 |
| <b>Table S14.</b> Elemental composition of the sample from Fig. 7c. ....                   | 49 |
| <b>Fig. S40.</b> A part of mapping for another area of <b>m-Ag<sub>2</sub>S-cat</b> .....  | 50 |
| <b>Fig. S41.</b> Energy profile elemental analysis. ....                                   | 51 |
| <b>Table S15.</b> Elemental composition of the sample. ....                                | 51 |

## Synthesis

<sup>t</sup>BuSAg was prepared according to the standard reaction between AgNO<sub>3</sub> and <sup>t</sup>BuSH in CH<sub>3</sub>CN in the presence of Et<sub>3</sub>N. All reagents were of commercial quality and were used as purchased. IR spectra were recorded on a FT-801 FT-IR spectrometer (Simex, Russia). Elemental analysis was carried out on a Eurovector EA 3000 CHN analyser.

**[NO<sub>3</sub>@Ag<sub>20</sub>(<sup>t</sup>BuS)<sub>10</sub>(NO<sub>3</sub>)<sub>9</sub>(DMF)<sub>6</sub>] (1):** 0.015 g (0.076 mmol) of <sup>t</sup>BuSAg was added to the clear solution of 0.100 g (0.589 mmol) AgNO<sub>3</sub> in 5 mL of DMF. The dissolution of silver mercaptide is completely proceed during one hour under stirring at room temperature (25 °C). The resulting solution was transferred to diethyl ether atmosphere. A few days later a crop of colorless crystals was collected and dried in air. Yield: 0.013 g (42% based on <sup>t</sup>BuSAg).

IR (ATR, cm<sup>-1</sup>): 2936 (w), 2856 (w), 1637 (vs), 1409 (s), 1386 (s), 1366 (s), 1303 (s), 1274 (vs), 1153 (s), 1100 (m), 1062 (w), 1031 (m), 938 (w), 864 (w), 807 (m), 722 (w), 662 (m).

Calc. for [Ag<sub>20</sub>(<sup>t</sup>BuS)<sub>10</sub>(DMF)<sub>6</sub>(NO<sub>3</sub>)<sub>10</sub>] C, H, N, S (%): 16.9, 3.2, 5.4, 7.8; found C, H, N, S (%): 16.1, 3.0, 5.2, 7.8.

**[NO<sub>3</sub>@Ag<sub>20</sub>(<sup>t</sup>BuS)<sub>10</sub>(NO<sub>3</sub>)<sub>8</sub>(NMP)<sub>8</sub>][NO<sub>3</sub>@Ag<sub>19</sub>(<sup>t</sup>BuS)<sub>10</sub>(NO<sub>3</sub>)<sub>8</sub>(NMP)<sub>6</sub>]<sub>2</sub>(NO<sub>3</sub>) (2):** 0.015 g (0.076 mmol) of <sup>t</sup>BuSAg was added to the clear solution of 0.100 g (0.589 mmol) AgNO<sub>3</sub> in 5 mL of N-methyl-2-pyrrolidone (NMP). Colorless crystalline product immediately precipitates. Yield: 0.015 g (47% based on <sup>t</sup>BuSAg).

IR (ATR, cm<sup>-1</sup>): 2954 (m), 2892 (m), 1630 (vs), 1506 (w), 1459 (m), 1407 (s), 1366 (s), 1317 (s), 1302 (s), 1263 (vs), 1149 (vs), 1113 (m), 1028 (s), 986 (w), 928 (w), 813 (m), 750 (w), 659 (m).

Calc. for [NO<sub>3</sub>@Ag<sub>20</sub>(<sup>t</sup>BuS)<sub>10</sub>(NO<sub>3</sub>)<sub>8</sub>(NMP)<sub>8</sub>][NO<sub>3</sub>@Ag<sub>19</sub>(<sup>t</sup>BuS)<sub>10</sub>(NO<sub>3</sub>)<sub>8</sub>(NMP)<sub>6</sub>]<sub>2</sub>(NO<sub>3</sub>) C, H, N, S (%): 20.9, 3.6, 5.3, 7.6; found C, H, N, S (%): 21.4, 3.6, 5.7, 7.6.

**[Br@Ag<sub>16</sub>(<sup>t</sup>BuS)<sub>8</sub>(NO<sub>3</sub>)<sub>7</sub>(DMF)<sub>3</sub>]·3DMF (3):** 0.070 g (0.355 mmol) of <sup>t</sup>BuSAg was added to the clear solution of 0.100 g (0.589 mmol) AgNO<sub>3</sub> in 5 mL of DMF. After complete dissolution 0.019 g (0.059mmol) of NBu<sub>4</sub>Br was added. The resulting white precipitate was filtered off. The final solution was placed into a closed vessel with diethyl ether atmosphere. A crop of colorless crystals was collected and dried in air in several days. Yield: 0.087 g (58% based on <sup>t</sup>BuSAg).

IR (ATR, cm<sup>-1</sup>): 2932(w), 1974 (w), 1642 (vs), 1461 (m), 1399 (s), 1381 (s), 1366 (s), 1265 (vs), 1151 (s), 1102 (s), 1063 (m), 1029 (m), 809 (m), 662 (m), 557 (s).

Calc. for [BrAg<sub>16</sub>(<sup>t</sup>BuS)<sub>8</sub>(NO<sub>3</sub>)<sub>7</sub>(DMF)<sub>3</sub>]·3DMF C, H, N, S (%): 18.0, 3.4, 5.9, 7.7; found C, H, N, S (%): 17.7, 3.4, 5.4, 7.6.



## Structural data

### SCXRD

Crystallographic data and refinement details for **1-3** are given in Table S1. The diffraction data were collected on a New Xcalibur (Agilent Technologies) diffractometer with MoK $\alpha$  radiation ( $\lambda = 0.71073$ ) by doing  $\varphi$  scans of narrow ( $0.5^\circ$ ) frames. Absorption correction was done empirically using SCALE3 ABSPACK (CrysAlisPro, Agilent Technologies, Version 1.171.37.35 (release 13-08-2014 CrysAlis171 .NET)). Structures were solved by SHELXT<sup>1</sup> and refined by full-matrix least-squares treatment against  $|F|^2$  in anisotropic approximation with SHELX 2014/7<sup>2</sup> in ShelXle program.<sup>3</sup> The main geometrical parameters are present in Table S2. H-atoms of organic ligands were refined in calculated positions.

In the structure of **2** a lot of NMP molecules have positional disorder which avoids refinement of this parts in anisotropic approximation without RIGU restraints. The positions of highly disordered NMP solvent molecules were not located. The complex composition was found from elemental analysis.

In the structure of **3** counter NO $_3^-$  anions and DMF molecules located in the voids between silver clusters were not refined. The SQUEEZE procedure<sup>4</sup> of PLATON program<sup>5</sup> gives 153.5e per formula unit. This can be approximated as 2 NO $_3^-$  and 2.25 DMF molecules. This fully correlates with elemental analysis.

The crystallographic data have been deposited in the Cambridge Crystallographic Data Centre under the deposition codes CCDC 2072541 (**1**), 2072542 (**2**), 2072543 (**3**).

### References

- (1) Sheldrick, G. M. SHELXT – Integrated Space-Group and Crystal-Structure Determination. *Acta Crystallogr. Sect. A Found. Adv.* **2015**, *71* (1), 3–8.
- (2) Sheldrick, G. M. Crystal Structure Refinement with SHELXL. *Acta Crystallogr. Sect. C Struct. Chem.* **2015**, *71* (1), 3–8.
- (3) Hübschle, C. B.; Sheldrick, G. M.; Dittrich, B. ShelXle : A Qt Graphical User Interface for SHELXL. *J. Appl. Crystallogr.* **2011**, *44* (6), 1281–1284.
- (4) Spek, A. L. PLATON SQUEEZE: A Tool for the Calculation of the Disordered Solvent Contribution to the Calculated Structure Factors. *Acta Crystallogr. Sect. C Struct. Chem.* **2015**, *71* (1), 9–18.
- (5) Spek, A. L. Structure Validation in Chemical Crystallography. *Acta Cryst* **2009**, *65*, 148–155.

**Table S1.** Experimental details

|                                                                            | <b>1</b>                                                                                          | <b>2</b>                                                                                                       | <b>3</b>                                                                                         |
|----------------------------------------------------------------------------|---------------------------------------------------------------------------------------------------|----------------------------------------------------------------------------------------------------------------|--------------------------------------------------------------------------------------------------|
| Chemical formula                                                           | C <sub>58</sub> H <sub>132</sub> Ag <sub>20</sub> N <sub>16</sub> O <sub>36</sub> S <sub>10</sub> | C <sub>226.50</sub> H <sub>459</sub> Ag <sub>58</sub> N <sub>46.40</sub> O <sub>94.20</sub><br>S <sub>30</sub> | C <sub>41</sub> H <sub>86</sub> Ag <sub>16</sub> BrN <sub>8</sub> O <sub>18</sub> S <sub>8</sub> |
| $M_r$                                                                      | 4107.79                                                                                           | 12558.43                                                                                                       | 3041.48                                                                                          |
| Crystal system, space group                                                | Monoclinic, $P2_1/n$                                                                              | Triclinic, $P\bar{1}$                                                                                          | Monoclinic, $C2/c$                                                                               |
| Temperature (K)                                                            | 140                                                                                               | 140                                                                                                            | 120                                                                                              |
| $a, b, c$ (Å)                                                              | 16.9481(9),<br>12.5260(7),<br>26.7721(13)                                                         | 15.9769(4), 25.0801(4),<br>25.4499(4)                                                                          | 18.2444(5), 41.9711(12),<br>15.2141(6)                                                           |
| $\alpha, \beta, \gamma$ (°)                                                | 90, 92.723(4), 90                                                                                 | 100.571(1), 101.461(2),<br>102.566(2)                                                                          | 90, 91.211(3), 90                                                                                |
| $V$ (Å <sup>3</sup> )                                                      | 5677.1 (5)                                                                                        | 9477.2 (3)                                                                                                     | 11647.4 (7)                                                                                      |
| $Z$                                                                        | 2                                                                                                 | 1                                                                                                              | 4                                                                                                |
| $\mu$ (mm <sup>-1</sup> )                                                  | 3.62                                                                                              | 3.15                                                                                                           | 3.15                                                                                             |
| Crystal size (mm)                                                          | 0.20 × 0.10 × 0.08                                                                                | 0.20 × 0.10 × 0.10                                                                                             | 0.20 × 0.20 × 0.10                                                                               |
| $T_{\min}, T_{\max}$                                                       | 0.768, 1.000                                                                                      | 0.897, 1.000                                                                                                   | 0.869, 1.000                                                                                     |
| No. of measured, independent and observed [ $I > 2\sigma(I)$ ] reflections | 31711, 13522, 8672                                                                                | 88057, 44174, 22283                                                                                            | 31002, 13848, 8388                                                                               |
| $R_{\text{int}}$                                                           | 0.050                                                                                             | 0.056                                                                                                          | 0.032                                                                                            |
| $\theta$ values (°)                                                        | $\theta_{\max} = 29.5, \theta_{\min} = 1.8$                                                       | $\theta_{\max} = 29.5, \theta_{\min} = 1.9$                                                                    | $\theta_{\max} = 29.6, \theta_{\min} = 2.3$                                                      |
| $(\sin \theta/\lambda)_{\max}$ (Å <sup>-1</sup> )                          | 0.693                                                                                             | 0.692                                                                                                          | 0.694                                                                                            |
| Range of $h, k, l$                                                         | $-19 \leq h \leq 21,$<br>$-16 \leq k \leq 15,$<br>$-36 \leq l \leq 27$                            | $-21 \leq h \leq 13,$<br>$-34 \leq k \leq 33,$<br>$-34 \leq l \leq 34$                                         | $-24 \leq h \leq 22,$<br>$-56 \leq k \leq 45,$<br>$-16 \leq l \leq 19$                           |
| $R[F^2 > 2\sigma(F^2)], wR(F^2), S$                                        | 0.050, 0.089, 0.97                                                                                | 0.075, 0.201, 1.00                                                                                             | 0.063, 0.210, 1.12                                                                               |
| No. of reflections, parameters, restraints                                 | 13522, 617, 6                                                                                     | 44174, 2006, 176                                                                                               | 13848, 413, 1                                                                                    |
| Weighting scheme                                                           | $w = 1/[\sigma^2(F_o^2) + (0.0279P)^2]$<br>where $P = (F_o^2 + 2F_c^2)/3$                         | $w = 1/[\sigma^2(F_o^2) + (0.0838P)^2]$<br>where $P = (F_o^2 + 2F_c^2)/3$                                      | $w = 1/[\sigma^2(F_o^2) + (0.1066P)^2 + 1.1259P]$<br>where $P = (F_o^2 + 2F_c^2)/3$              |
| $\Delta\rho_{\max}, \Delta\rho_{\min}$ (e Å <sup>-3</sup> )                | 1.83, -1.03                                                                                       | 3.21, -1.38                                                                                                    | 1.51, -0.86                                                                                      |

Computer programs: *CrysAlis PRO* 1.171.38.41 (Rigaku OD, 2015), *SHELXS2014* (Sheldrick, 2014), *SHELXL2014* (Sheldrick, 2014), *ShelXle* (Hübschle, 2011), *CIFTAB-2014* (Sheldrick, 2014).

**Table S2.** Selected geometric parameters (Å)

| <b>1</b>                 |             |                         |             |
|--------------------------|-------------|-------------------------|-------------|
| Ag1—Ag2                  | 3.1459 (7)  | S2—Ag7                  | 2.4617 (16) |
| Ag1—Ag7 <sup>i</sup>     | 3.1662 (7)  | S3—Ag3                  | 2.4244 (15) |
| Ag1—Ag9 <sup>i</sup>     | 3.1239 (8)  | S3—Ag5                  | 2.5122 (16) |
| Ag2—Ag3                  | 2.8980 (7)  | S3—Ag8                  | 2.4735 (15) |
| Ag2—Ag9 <sup>i</sup>     | 2.9193 (7)  | S3—Ag10 <sup>i</sup>    | 2.4946 (15) |
| Ag2—Ag10 <sup>i</sup>    | 3.0964 (7)  | S4—Ag1 <sup>i</sup>     | 2.6089 (17) |
| Ag3—Ag6B <sup>i</sup>    | 3.322 (10)  | S4—Ag7                  | 2.4697 (16) |
| Ag3—Ag6A <sup>i</sup>    | 3.0973 (11) | S4—Ag8                  | 2.4440 (16) |
| Ag3—Ag10 <sup>i</sup>    | 3.1048 (7)  | S4—Ag9                  | 2.3788 (15) |
| Ag4—Ag5                  | 3.0299 (7)  | S5—Ag2 <sup>i</sup>     | 2.6183 (16) |
| Ag4—Ag10 <sup>i</sup>    | 3.0648 (7)  | S5—Ag4 <sup>i</sup>     | 2.4699 (15) |
| Ag5—Ag7                  | 3.0235 (7)  | S5—Ag9                  | 2.3853 (15) |
| Ag5—Ag8                  | 3.0494 (7)  | S5—Ag10                 | 2.4971 (15) |
| Ag5—Ag10 <sup>i</sup>    | 3.0508 (7)  | O1—Ag1                  | 2.296 (5)   |
| Ag6B—Ag7                 | 3.125 (9)   | O3—Ag2                  | 2.350 (4)   |
| Ag6A—Ag6B                | 0.623 (7)   | O5—Ag2                  | 2.558 (4)   |
| Ag8—Ag9                  | 3.2092 (7)  | O6—Ag5                  | 2.389 (4)   |
| S1—Ag1                   | 2.5217 (17) | O7—Ag7                  | 2.584 (5)   |
| S1—Ag2                   | 2.5530 (16) | O8—Ag7                  | 2.385 (4)   |
| S1—Ag3                   | 2.4254 (15) | O10A—Ag5 <sup>i</sup>   | 2.513 (9)   |
| S1—Ag6B <sup>i</sup>     | 2.353 (10)  | O11—Ag10                | 2.308 (4)   |
| S1—Ag6A <sup>i</sup>     | 2.5765 (18) | O14B—Ag6A <sup>i</sup>  | 2.577 (13)  |
| S2—Ag4                   | 2.4493 (16) | Ag6A—O18                | 2.261 (11)  |
| S2—Ag5                   | 2.5229 (16) | Ag6A—O19 <sup>ii</sup>  | 2.388 (10)  |
| S2—Ag6B                  | 2.344 (10)  | Ag8—O17                 | 2.546 (10)  |
| S2—Ag6A                  | 2.5282 (18) |                         |             |
| <b>2</b>                 |             |                         |             |
| Ag1—Ag2                  | 3.0126 (12) | S7—Ag3                  | 2.489 (3)   |
| Ag1—Ag3                  | 3.2429 (13) | S7—Ag20                 | 2.419 (2)   |
| Ag1—Ag21                 | 3.0186 (13) | S7—Ag21                 | 2.584 (3)   |
| Ag2—Ag4                  | 3.0752 (14) | S8—Ag1                  | 2.527 (3)   |
| Ag2—Ag21                 | 2.9423 (13) | S8—Ag2                  | 2.421 (3)   |
| Ag2—Ag32                 | 3.368 (11)  | S8—Ag4                  | 2.554 (3)   |
| Ag4—Ag5                  | 2.9008 (16) | S8—Ag5                  | 2.678 (3)   |
| Ag4—Ag7                  | 3.1514 (13) | S8—Ag30                 | 2.464 (12)  |
| Ag4—Ag32                 | 0.692 (9)   | S8—Ag32                 | 2.331 (11)  |
| Ag5—Ag30                 | 1.074 (13)  | S9—Ag10                 | 2.448 (4)   |
| Ag5—Ag32                 | 2.219 (10)  | S9—Ag25 <sup>iii</sup>  | 2.559 (3)   |
| Ag6—Ag8                  | 2.9943 (12) | S9—Ag27                 | 2.432 (3)   |
| Ag7—Ag8                  | 2.9896 (11) | S9—Ag28                 | 2.543 (3)   |
| Ag7—Ag9                  | 3.1394 (12) | S10—Ag22 <sup>iii</sup> | 2.593 (3)   |
| Ag9—Ag12                 | 3.1132 (13) | S10—Ag26                | 2.439 (4)   |
| Ag9—Ag13                 | 2.9696 (12) | S10—Ag27                | 2.433 (3)   |
| Ag10—Ag11                | 3.2279 (14) | S10—Ag29                | 2.523 (4)   |
| Ag10—Ag25 <sup>iii</sup> | 3.0908 (14) | S11—Ag11 <sup>iii</sup> | 2.601 (3)   |
| Ag11—Ag22                | 3.229 (2)   | S11—Ag24                | 2.433 (3)   |
| Ag11—Ag25 <sup>iii</sup> | 3.2949 (19) | S11—Ag25                | 2.532 (3)   |
| Ag11—Ag26 <sup>iii</sup> | 3.0227 (13) | S11—Ag26                | 2.434 (3)   |
| Ag12—Ag13                | 3.0510 (11) | S12—Ag10                | 2.438 (4)   |
| Ag13—Ag14                | 3.1102 (12) | S12—Ag11                | 2.536 (3)   |

|                          |             |                         |            |
|--------------------------|-------------|-------------------------|------------|
| Ag13—Ag15                | 3.2154 (14) | S12—Ag22                | 2.573 (4)  |
| Ag14—Ag15                | 3.1258 (12) | S12—Ag23                | 2.440 (3)  |
| Ag14—Ag18                | 3.2450 (14) | S13—Ag23                | 2.422 (3)  |
| Ag15—Ag16                | 3.0982 (12) | S13—Ag24                | 2.451 (3)  |
| Ag15—Ag17                | 3.2446 (16) | S13—Ag28 <sup>iii</sup> | 2.608 (3)  |
| Ag16—Ag17                | 3.1046 (13) | S13—Ag29 <sup>iii</sup> | 2.590 (3)  |
| Ag17—Ag18                | 3.1760 (13) | S14—Ag14                | 2.410 (3)  |
| Ag17—Ag19                | 3.1507 (16) | S14—Ag15                | 2.578 (3)  |
| Ag18—Ag19                | 3.2131 (15) | S14—Ag17                | 2.518 (3)  |
| Ag19—Ag20                | 3.2556 (12) | S14—Ag18                | 2.413 (3)  |
| Ag19—Ag21                | 3.2121 (14) | S15—Ag7                 | 2.404 (3)  |
| Ag20—Ag21                | 2.9972 (11) | S15—Ag9                 | 2.566 (3)  |
| Ag22—Ag23                | 3.1241 (15) | S15—Ag13                | 2.611 (3)  |
| Ag22—Ag26 <sup>iii</sup> | 3.2593 (17) | S15—Ag14                | 2.404 (3)  |
| Ag22—Ag29 <sup>iii</sup> | 3.1059 (18) | O1—Ag8                  | 2.562 (8)  |
| Ag23—Ag29 <sup>iii</sup> | 3.1739 (17) | O2—Ag9                  | 2.372 (8)  |
| Ag24—Ag25                | 3.3224 (13) | O4—Ag8                  | 2.311 (7)  |
| Ag24—Ag28 <sup>iii</sup> | 2.9717 (15) | O5B—Ag13                | 2.23 (3)   |
| Ag25—Ag28 <sup>iii</sup> | 3.1414 (18) | O8—Ag5                  | 2.300 (11) |
| Ag27—Ag28                | 3.0432 (13) | O9B—Ag30                | 2.27 (2)   |
| Ag27—Ag29                | 3.1965 (14) | O9A—Ag5                 | 2.59 (4)   |
| Ag30—Ag32                | 2.914 (16)  | O9A—Ag30                | 2.36 (4)   |
| S1—Ag3                   | 2.440 (3)   | O11—Ag1                 | 2.275 (8)  |
| S1—Ag5                   | 2.451 (3)   | O12—Ag21                | 2.515 (7)  |
| S1—Ag6                   | 2.387 (2)   | O13—Ag21                | 2.366 (9)  |
| S1—Ag30                  | 2.475 (12)  | O14—Ag19                | 2.491 (10) |
| S2—Ag4                   | 2.504 (3)   | O16—Ag19                | 2.252 (8)  |
| S2—Ag7                   | 2.428 (3)   | O17—Ag17                | 2.540 (7)  |
| S2—Ag8                   | 2.512 (3)   | O19—Ag15                | 2.353 (8)  |
| S2—Ag32                  | 2.291 (11)  | O20—Ag20                | 2.583 (8)  |
| S3—Ag6                   | 2.442 (3)   | O23—Ag16                | 2.582 (8)  |
| S3—Ag8                   | 2.592 (3)   | O26—Ag4                 | 2.498 (9)  |
| S3—Ag9                   | 2.526 (3)   | O27B—Ag4                | 2.56 (3)   |
| S3—Ag12                  | 2.456 (3)   | O29—Ag11                | 2.495 (11) |
| S4—Ag12                  | 2.425 (2)   | O31—Ag17                | 2.261 (17) |
| S4—Ag13                  | 2.616 (3)   | O33—Ag28                | 2.294 (11) |
| S4—Ag15                  | 2.532 (2)   | O34—Ag28                | 2.393 (15) |
| S4—Ag16                  | 2.410 (3)   | O35—Ag29                | 2.438 (17) |
| S5—Ag16                  | 2.460 (3)   | O37—Ag29                | 2.349 (12) |
| S5—Ag17                  | 2.541 (3)   | O38—Ag25                | 2.249 (10) |
| S5—Ag19                  | 2.517 (3)   | O39—Ag15                | 2.520 (11) |
| S5—Ag20                  | 2.458 (2)   | O40A—Ag13               | 2.383 (13) |
| S6—Ag2                   | 2.430 (3)   | O41—Ag3                 | 2.460 (8)  |
| S6—Ag18                  | 2.403 (3)   | O49—Ag11                | 2.367 (8)  |
| S6—Ag19                  | 2.604 (3)   | O50—Ag29                | 2.23 (4)   |
| S6—Ag21                  | 2.598 (3)   | O55—Ag22                | 2.346 (19) |
| S7—Ag1                   | 2.496 (3)   |                         |            |
| <b>3</b>                 |             |                         |            |
| Ag1—Ag2 <sup>iv</sup>    | 3.0365 (10) | S1—Ag3 <sup>iv</sup>    | 2.500 (2)  |
| Ag1—Ag2                  | 3.0365 (10) | S1—Ag9                  | 2.410 (2)  |
| Ag1—Ag3 <sup>iv</sup>    | 3.2996 (9)  | S2—Ag2                  | 2.435 (2)  |
| Ag1—Ag3                  | 3.2997 (9)  | S2—Ag3                  | 2.508 (2)  |
| Ag2—Ag3                  | 3.1272 (10) | S2—Ag4                  | 2.488 (2)  |
| Ag2—Ag5                  | 3.2829 (9)  | S2—Ag5                  | 2.446 (2)  |

|                       |             |                       |            |
|-----------------------|-------------|-----------------------|------------|
| Ag2—Ag9               | 3.2851 (9)  | S3—Ag5                | 2.455 (2)  |
| Ag3—Ag4               | 3.3451 (11) | S3—Ag6                | 2.508 (2)  |
| Ag3—Ag9 <sup>iv</sup> | 3.1695 (11) | S3—Ag7                | 2.414 (2)  |
| Ag4—Ag5               | 3.0248 (9)  | S3—Ag8 <sup>iv</sup>  | 2.487 (2)  |
| Ag4—Ag8 <sup>iv</sup> | 3.1390 (11) | S4—Ag4 <sup>iv</sup>  | 2.518 (2)  |
| Ag4—Ag9 <sup>iv</sup> | 3.0585 (10) | S4—Ag7                | 2.409 (2)  |
| Ag5—Ag7               | 3.1775 (9)  | S4—Ag8                | 2.488 (2)  |
| Ag5—Ag8 <sup>iv</sup> | 3.0377 (10) | S4—Ag9                | 2.417 (2)  |
| Ag6—Ag7 <sup>iv</sup> | 3.2115 (10) | O1X—Ag6               | 2.254 (15) |
| Ag6—Ag7               | 3.2115 (10) | O2—Ag4                | 2.343 (13) |
| Ag6—Ag8 <sup>iv</sup> | 3.3782 (9)  | O3—Ag1                | 2.370 (14) |
| Ag6—Ag8               | 3.3783 (9)  | O8—Ag8                | 2.310 (10) |
| Ag7—Ag8               | 3.0841 (10) | O14—Ag4 <sup>iv</sup> | 2.47 (2)   |
| Ag7—Ag9               | 3.3066 (10) | Ag3—O12B              | 2.21 (4)   |
| S1—Ag1                | 2.499 (2)   | Ag3—O12A              | 2.327 (13) |
| S1—Ag2                | 2.442 (2)   | Ag5—Br1               | 2.9554 (7) |

Symmetry code(s): (i)  $-x+1, -y+1, -z+1$ ; (ii)  $-x+1, -y, -z+1$ ; (iii)  $-x+1, -y+2, -z+1$ ; (iv)  $-x+1, y, -z+1/2$ .

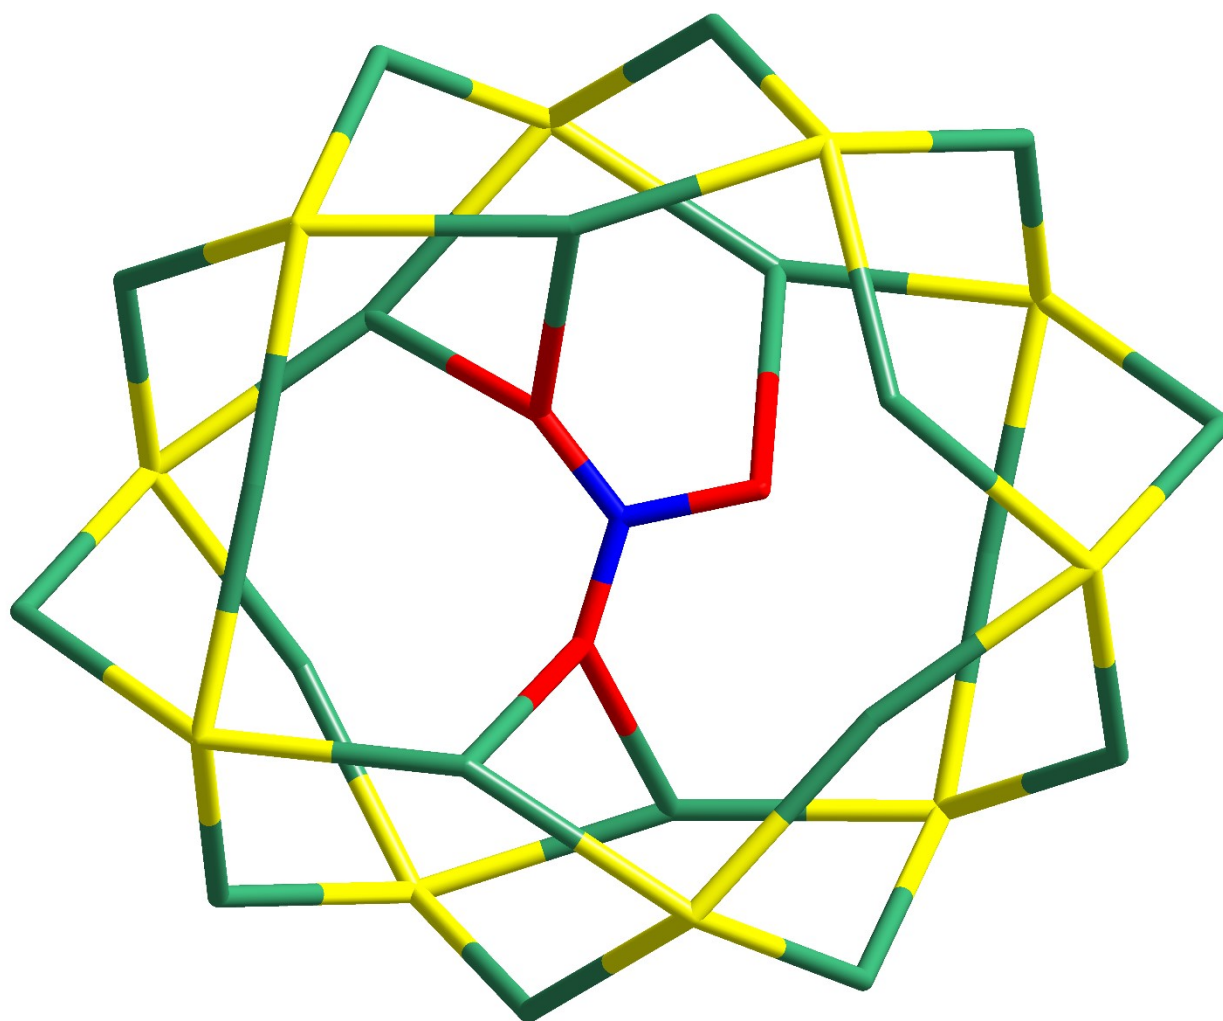

**Fig. S1.** The position of NO<sub>3</sub><sup>-</sup> inside {Ag<sub>20</sub>(tBuS)<sub>10</sub>} cluster core in the crystal structure of **1**.

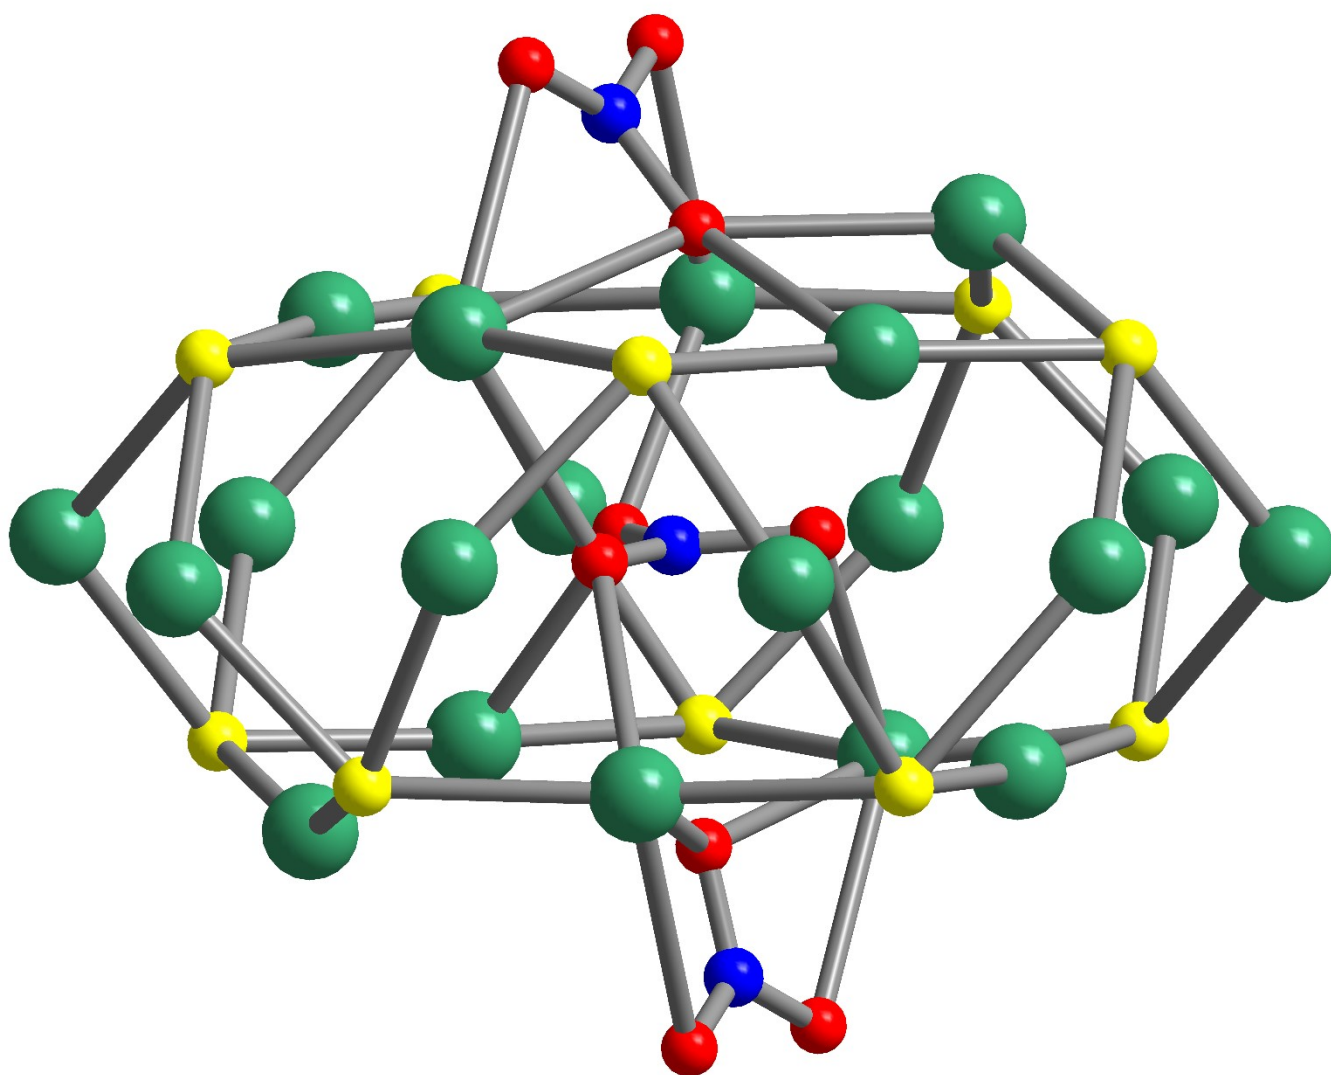

**Fig. S2.** The capping and central NO<sub>3</sub><sup>-</sup> anions inside {Ag<sub>20</sub>(tBuS)<sub>10</sub>} cluster core in the crystal structure of **1**.

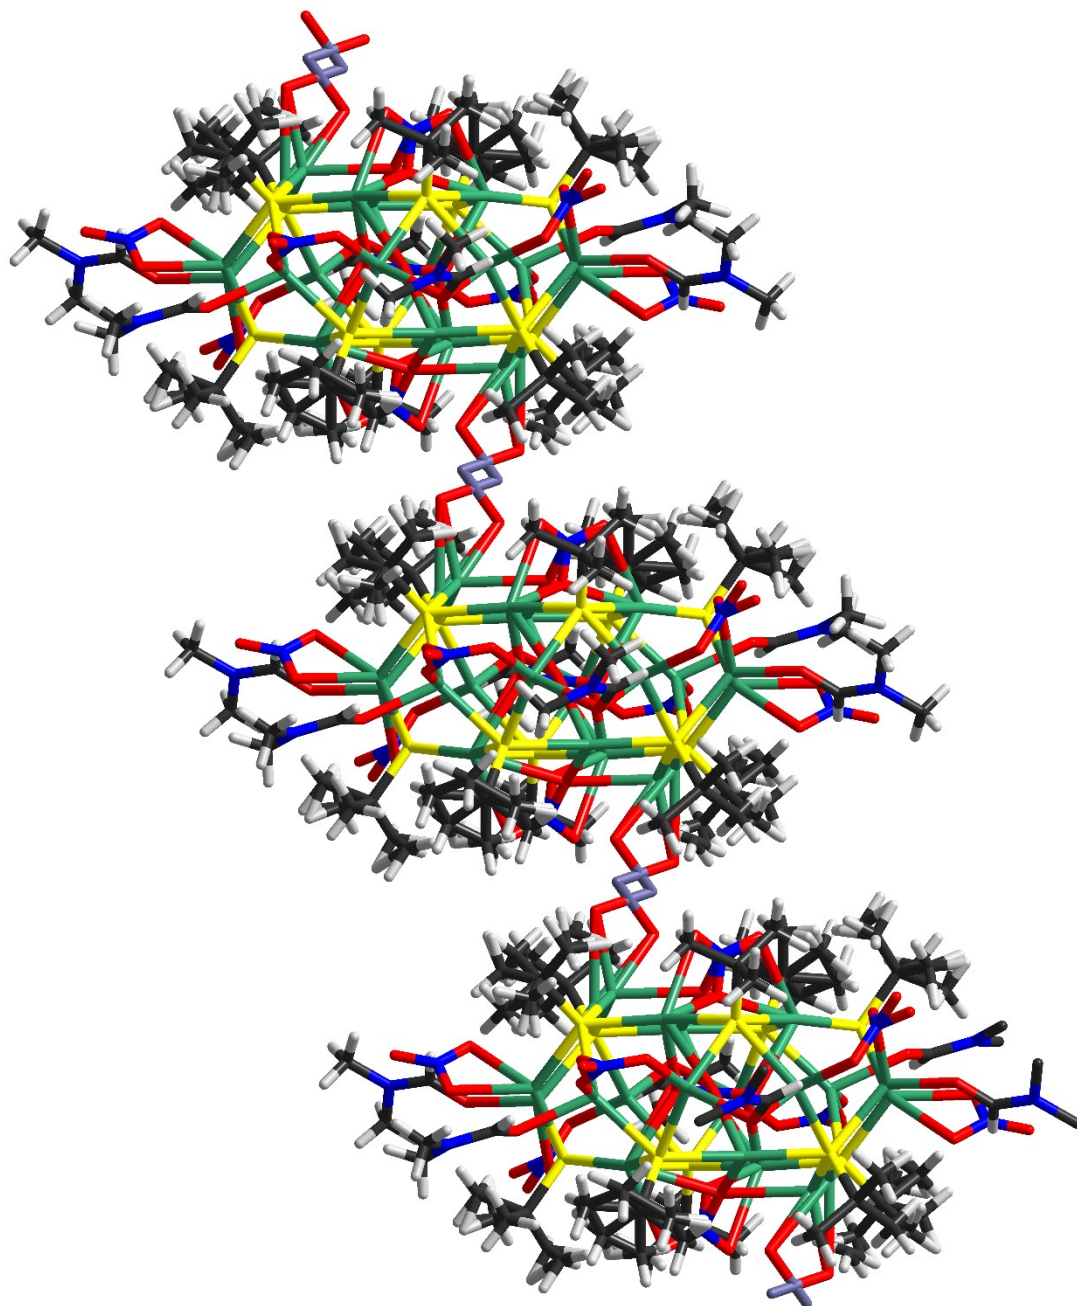

**Fig. S3.** The cluster chain fragment in the crystal structure of **1**.



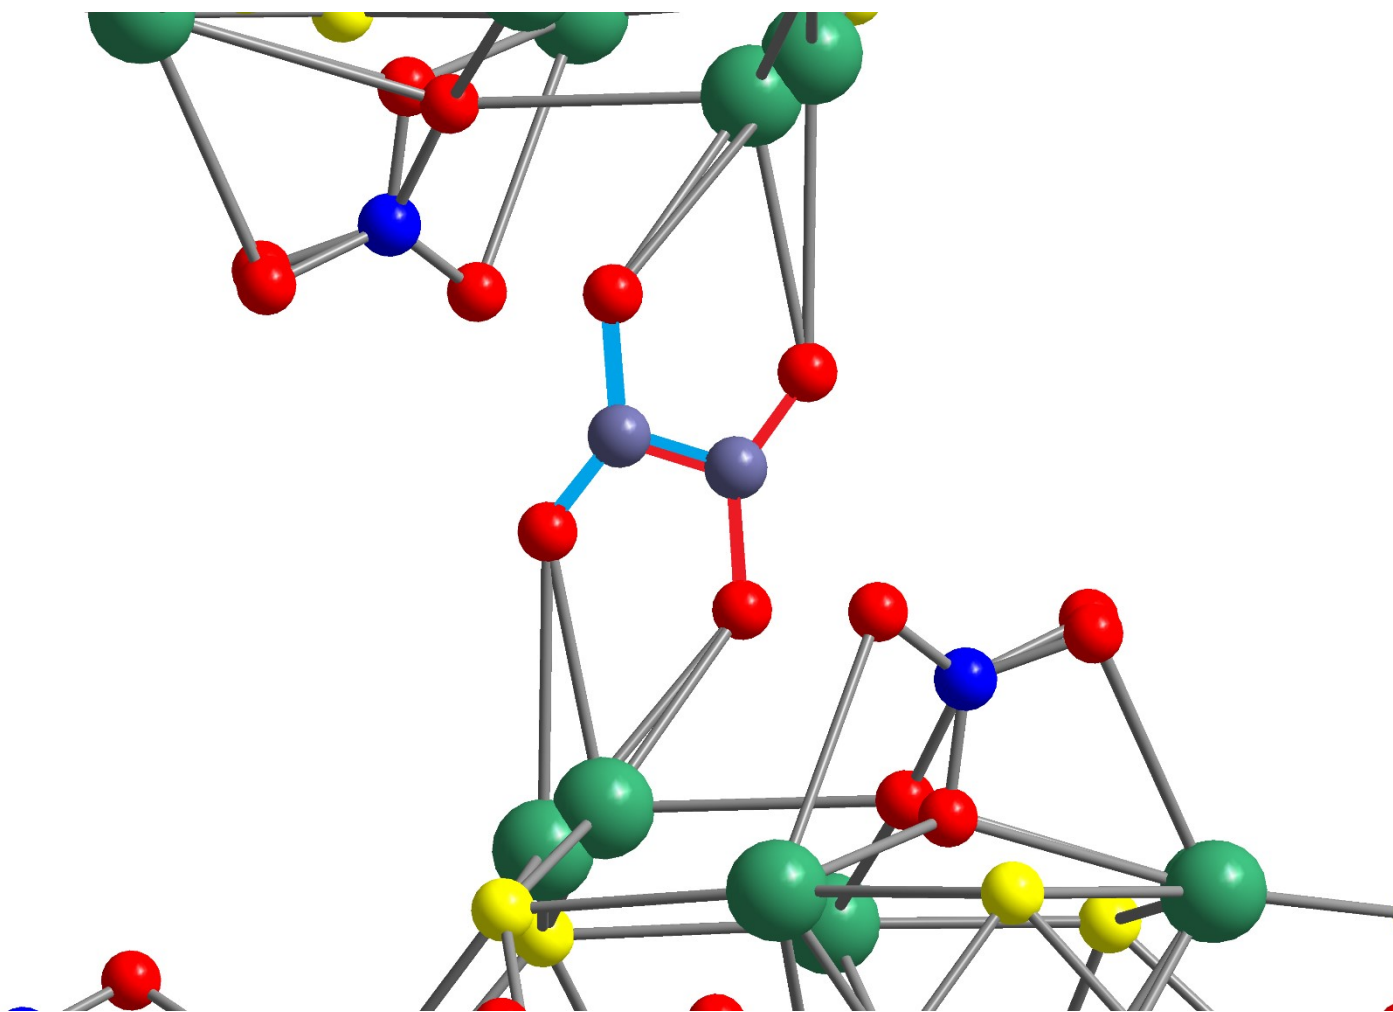

**Fig. S4.** Disordering of the bridged NO<sub>3</sub><sup>-</sup> in the crystal structure of **1**.

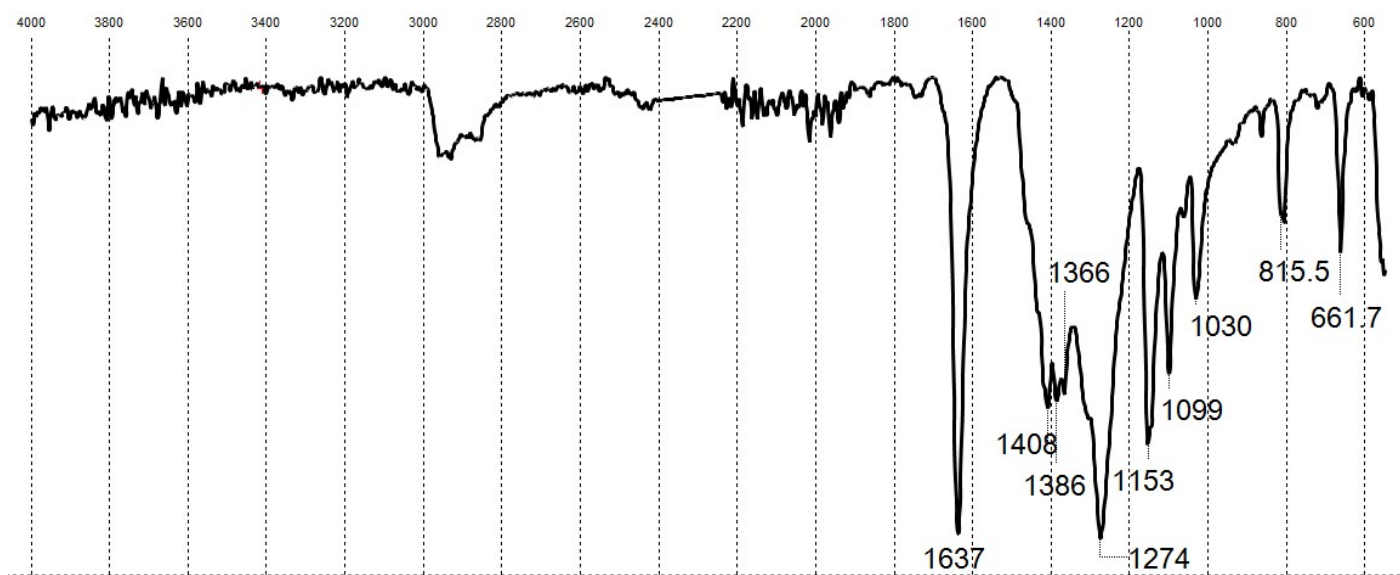

**Fig. S5.** The FT-IR spectrum of **1**.

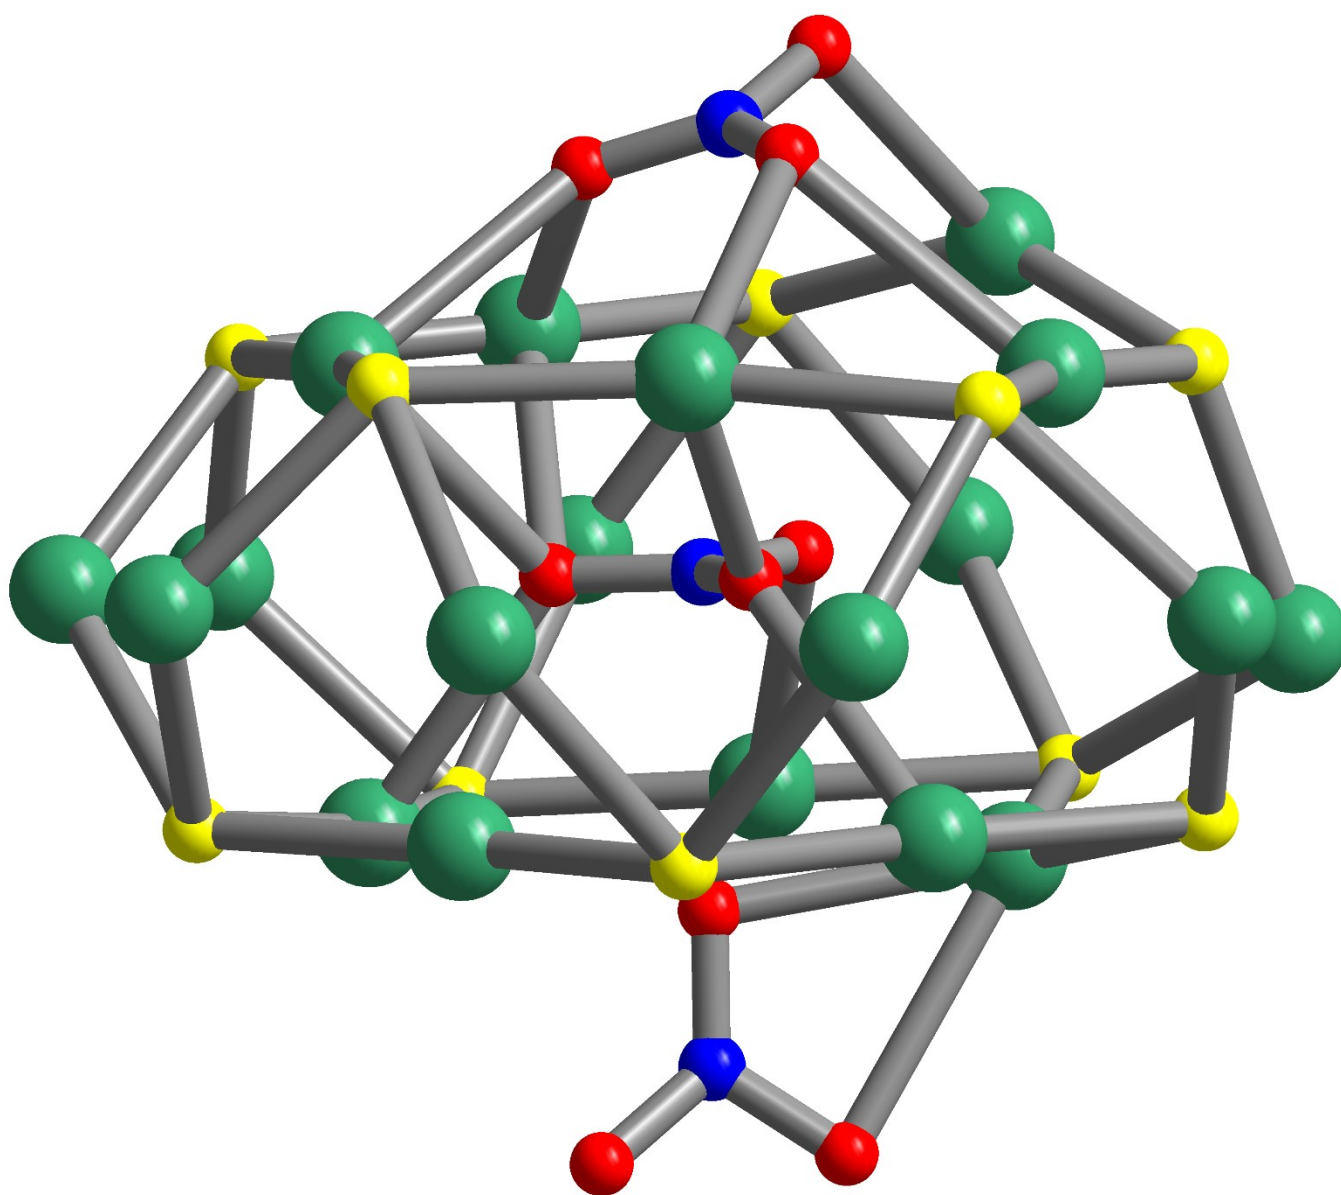

**Fig. S6.** The capping and central  $\text{NO}_3^-$  anions inside  $\{\text{Ag}_{19}(\text{tBuS})_{10}\}$  cluster core in the crystal structure of **2**.

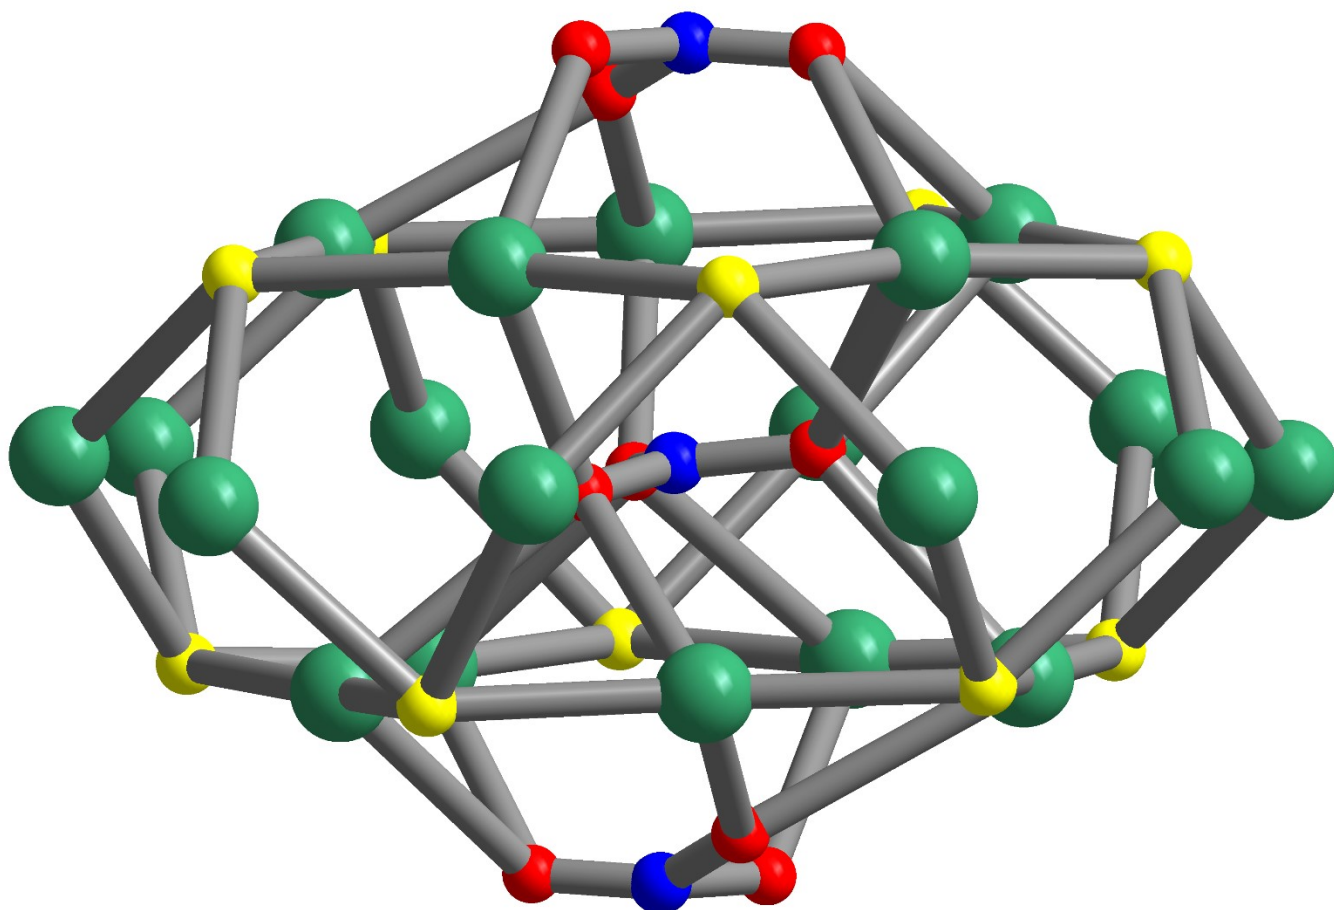

**Fig. S7.** The capping and central  $\text{NO}_3^-$  anions inside  $\{\text{Ag}_{20}(\text{tBuS})_{10}\}$  cluster core in the crystal structure of **2**.



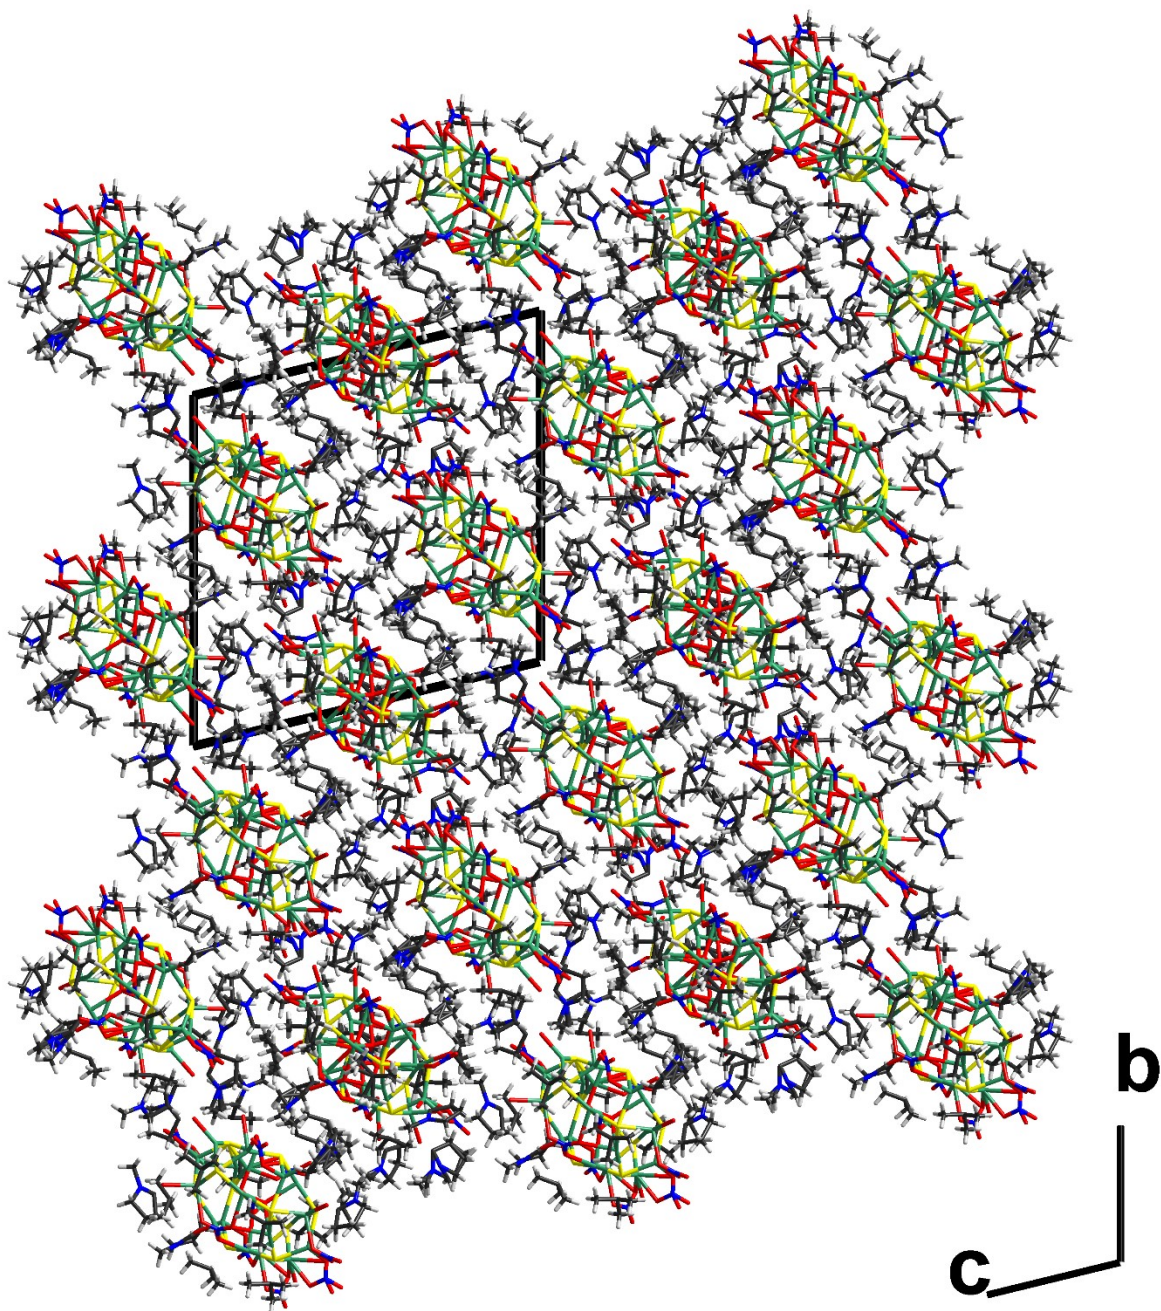

**Fig. S8.** The crystal packing of **2**.

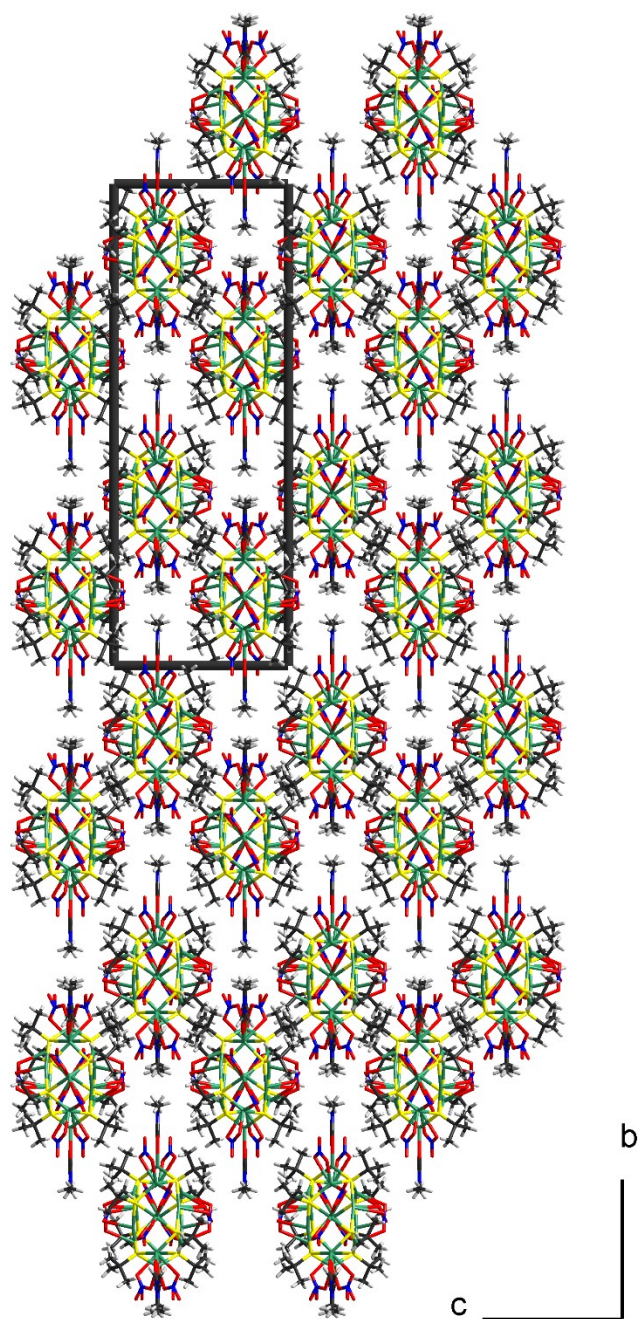

**Fig. S9.** Crystal packing of **3**. View along crystal axes *a*.



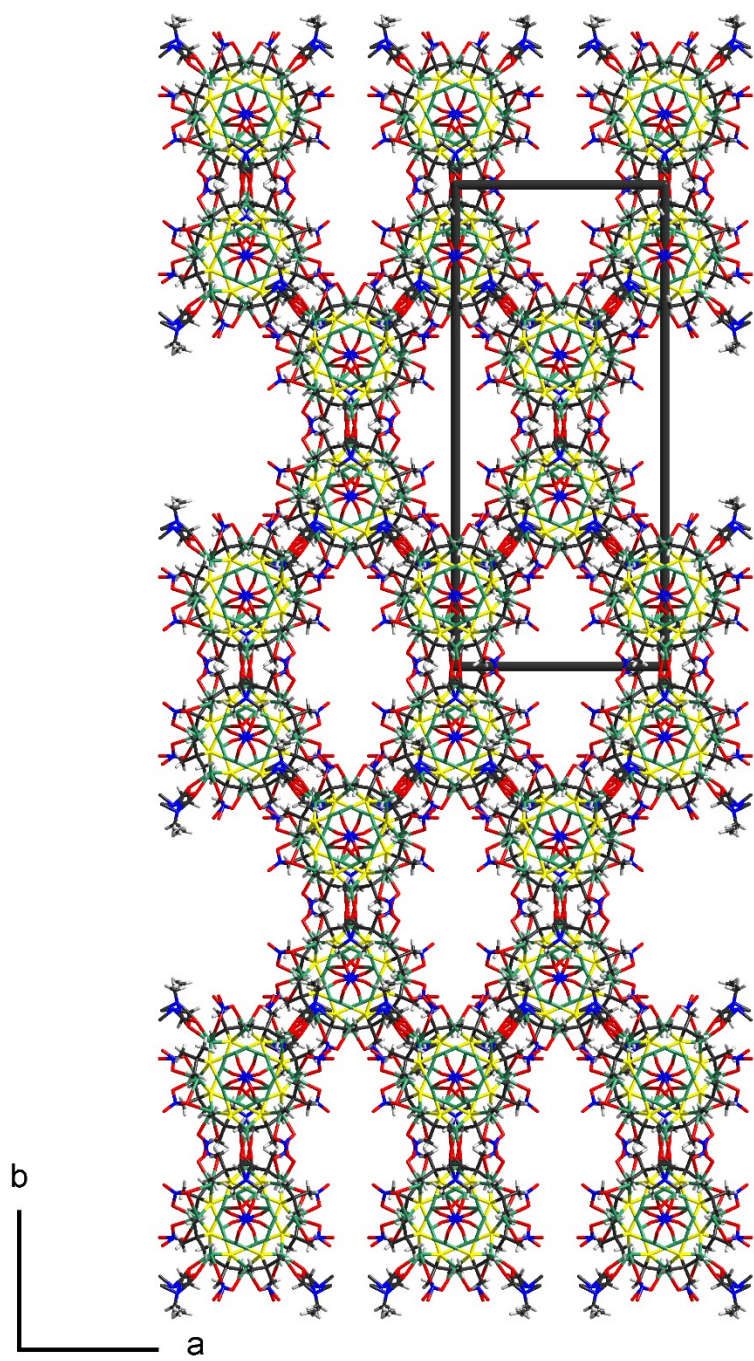

**Fig. S10.** Crystal packing of **3**. View along crystal axes *c*.

## HR-ESI-MS data

The high-resolution electrospray ionization mass spectrometric (HR-ESI-MS) measurements were performed at the Center of Collective Use «Mass spectrometric investigations» SB RAS. Spectra were obtained with a direct injection of liquid samples on an ESI quadrupole time-of-flight (ESI-q-TOF) high-resolution mass spectrometer Maxis 4G (Bruker Daltonics, Germany). The spectra were recorded in the 300-3000 m/z range in negative and positive modes.

**Fig. S11.** Full HR-ESI-MS(-) spectrum of **1** in CH<sub>3</sub>CN solution.

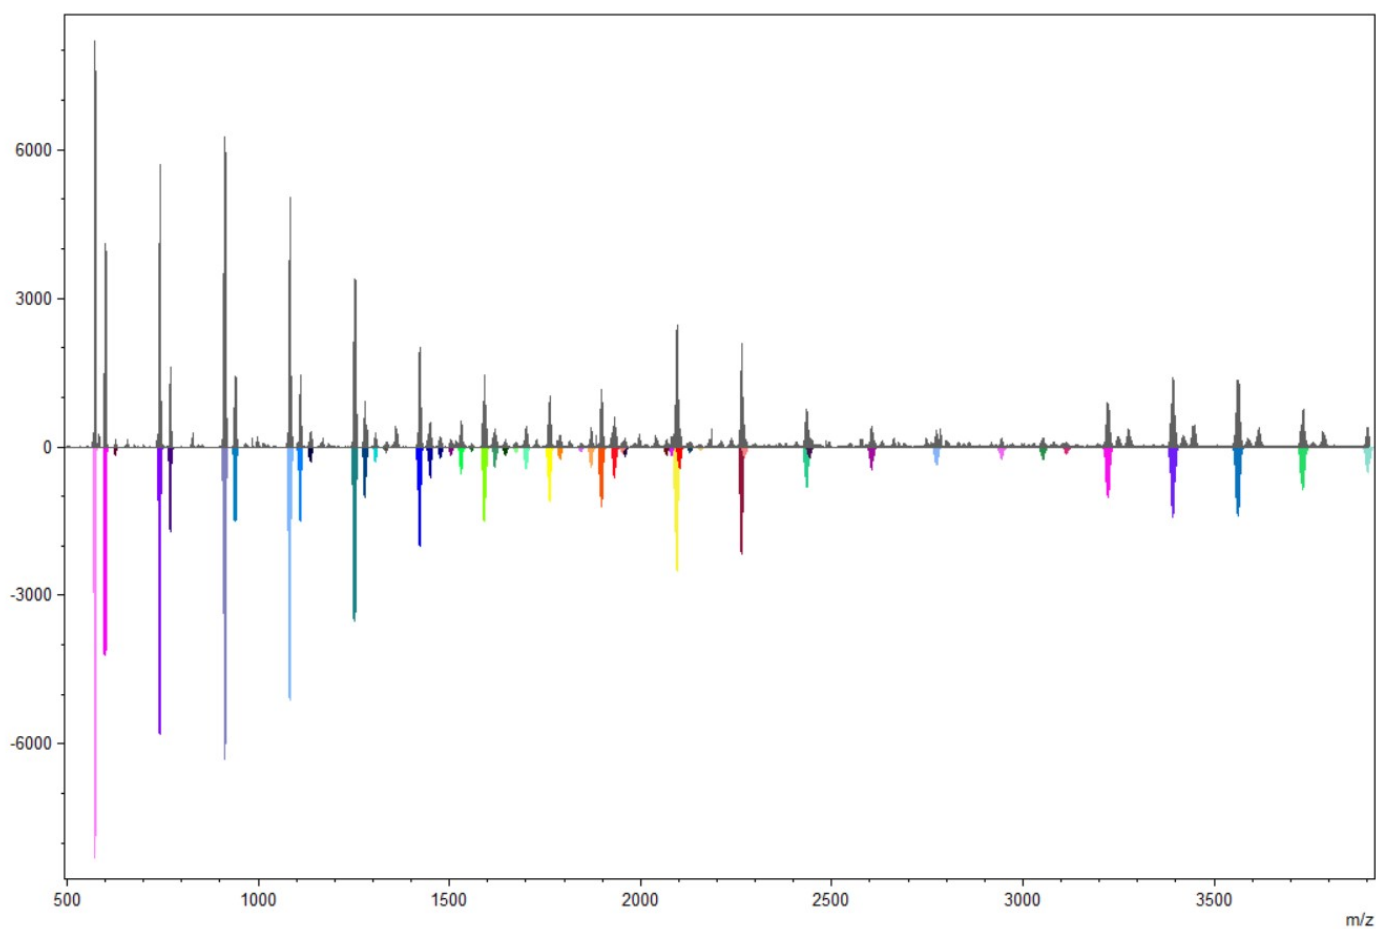



**Table S3.** Peak assignment for the spectrum of **1** presented in Fig. S11.

| anion                                                                        | m/z exp  | m/z calc |
|------------------------------------------------------------------------------|----------|----------|
| $[\text{Ag}_3(\text{NO}_3)_4]^-$                                             | 571.664  | 571.665  |
| $[\text{Ag}_3(\text{C}_4\text{H}_9\text{S})(\text{NO}_3)_3]^-$               | 598.722  | 598.723  |
| $[\text{Ag}_3(\text{C}_4\text{H}_9\text{S})_2(\text{NO}_3)_2]^-$             | 625.777  | 625.778  |
| $[\text{Ag}_4(\text{NO}_3)_5]^-$                                             | 741.556  | 741.560  |
| $[\text{Ag}_4(\text{C}_4\text{H}_9\text{S})(\text{NO}_3)_4]^-$               | 768.615  | 768.613  |
| $[\text{Ag}_5(\text{NO}_3)_6]^-$                                             | 911.450  | 911.451  |
| $[\text{Ag}_5(\text{C}_4\text{H}_9\text{S})(\text{NO}_3)_5]^-$               | 938.501  | 938.508  |
| $[\text{Ag}_6(\text{NO}_3)_7]^-$                                             | 1081.348 | 1081.343 |
| $[\text{Ag}_6(\text{C}_4\text{H}_9\text{S})(\text{NO}_3)_6]^-$               | 1108.396 | 1108.400 |
| $[\text{Ag}_6(\text{C}_4\text{H}_9\text{S})_2(\text{NO}_3)_5]^-$             | 1135.458 | 1135.454 |
| $[\text{Ag}_7(\text{NO}_3)_8]^-$                                             | 1251.237 | 1251.236 |
| $[\text{Ag}_7(\text{C}_4\text{H}_9\text{S})(\text{NO}_3)_7]^-$               | 1278.295 | 1278.293 |
| $[\text{Ag}_7(\text{C}_4\text{H}_9\text{S})_2(\text{NO}_3)_6]^-$             | 1305.343 | 1305.349 |
| $[\text{Ag}_7(\text{C}_4\text{H}_9\text{S})_3(\text{NO}_3)_5]^-$             | 1332.402 | 1332.403 |
| $[\text{Ag}_8(\text{NO}_3)_9]^-$                                             | 1421.127 | 1421.131 |
| $[\text{Ag}_8(\text{C}_4\text{H}_9\text{S})(\text{NO}_3)_8]^-$               | 1448.179 | 1448.185 |
| $[\text{Ag}_8(\text{C}_4\text{H}_9\text{S})_2(\text{NO}_3)_7]^-$             | 1475.236 | 1475.239 |
| $[\text{Ag}_8(\text{C}_4\text{H}_9\text{S})_3(\text{NO}_3)_6]^-$             | 1502.295 | 1502.294 |
| $[\text{Ag}_8(\text{C}_4\text{H}_9\text{S})_4(\text{NO}_3)_5]^-$             | 1529.341 | 1529.349 |
| $[\text{Ag}_8(\text{C}_4\text{H}_9\text{S})_5(\text{NO}_3)_4]^-$             | 1556.411 | 1556.403 |
| $[\text{Ag}_9(\text{NO}_3)_{10}]^-$                                          | 1591.027 | 1591.022 |
| $[\text{Ag}_9(\text{C}_4\text{H}_9\text{S})(\text{NO}_3)_9]^-$               | 1618.083 | 1618.079 |
| $[\text{Ag}_9(\text{C}_4\text{H}_9\text{S})_2(\text{NO}_3)_8]^-$             | 1645.133 | 1645.134 |
| $[\text{Ag}_9(\text{C}_4\text{H}_9\text{S})_3(\text{NO}_3)_7]^-$             | 1672.191 | 1672.188 |
| $[\text{Ag}_9(\text{C}_4\text{H}_9\text{S})_4(\text{NO}_3)_6]^-$             | 1699.250 | 1699.244 |
| $[\text{Ag}_{10}(\text{NO}_3)_{11}]^-$                                       | 1760.913 | 1760.916 |
| $[\text{Ag}_{10}(\text{C}_4\text{H}_9\text{S})(\text{NO}_3)_{10}]^-$         | 1787.977 | 1787.971 |
| $[\text{Ag}_{10}(\text{C}_4\text{H}_9\text{S})_3(\text{NO}_3)_8]^-$          | 1842.082 | 1842.079 |
| $[\text{Ag}_{10}(\text{C}_4\text{H}_9\text{S})_4(\text{NO}_3)_7]^-$          | 1869.130 | 1869.134 |
| $[\text{Ag}_{20}(\text{C}_4\text{H}_9\text{S})_{10}(\text{NO}_3)_{12}]^{2-}$ | 1896.687 | 1896.690 |
| $[\text{Ag}_{11}(\text{NO}_3)_{12}]^-$                                       | 1930.805 | 1930.808 |
| $[\text{Ag}_{11}(\text{C}_4\text{H}_9\text{S})(\text{NO}_3)_{11}]^-$         | 1957.862 | 1957.864 |
| $[\text{Ag}_{11}(\text{C}_4\text{H}_9\text{S})_5(\text{NO}_3)_7]^-$          | 2066.091 | 2066.084 |
| $[\text{Ag}_{22}(\text{C}_4\text{H}_9\text{S})_{11}(\text{NO}_3)_{13}]^{2-}$ | 2080.111 | 2080.110 |
| $[\text{Ag}_{11}(\text{C}_4\text{H}_9\text{S})_6(\text{NO}_3)_6]^-$          | 2094.134 | 2094.136 |
| $[\text{Ag}_{12}(\text{NO}_3)_{13}]^-$                                       | 2100.697 | 2100.702 |
| $[\text{Ag}_{12}(\text{C}_4\text{H}_9\text{S})(\text{NO}_3)_{12}]^-$         | 2127.763 | 2127.756 |
| $[\text{Ag}_{12}(\text{C}_4\text{H}_9\text{S})_2(\text{NO}_3)_{11}]^-$       | 2154.802 | 2154.810 |
| $[\text{Ag}_{24}(\text{C}_4\text{H}_9\text{S})_{12}(\text{NO}_3)_{14}]^{2-}$ | 2263.526 | 2263.529 |
| $[\text{Ag}_{13}(\text{NO}_3)_{14}]^-$                                       | 2270.597 | 2270.593 |
| $[\text{Ag}_{13}(\text{C}_4\text{H}_9\text{S})_6(\text{NO}_3)_8]^-$          | 2433.912 | 2433.921 |
| $[\text{Ag}_{14}(\text{NO}_3)_{15}]^-$                                       | 2440.483 | 2440.487 |
| $[\text{Ag}_{14}(\text{C}_4\text{H}_9\text{S})_6(\text{NO}_3)_9]^-$          | 2602.808 | 2602.814 |
| $[\text{Ag}_{15}(\text{C}_4\text{H}_9\text{S})_6(\text{NO}_3)_{10}]^-$       | 2772.716 | 2772.709 |
| $[\text{Ag}_{16}(\text{C}_4\text{H}_9\text{S})_6(\text{NO}_3)_{11}]^-$       | 2942.606 | 2942.600 |
| $[\text{Ag}_{16}(\text{C}_4\text{H}_9\text{S})_{10}(\text{NO}_3)_7]^-$       | 3051.810 | 3051.821 |
| $[\text{Ag}_{17}(\text{C}_4\text{H}_9\text{S})_6(\text{NO}_3)_{12}]^-$       | 3112.500 | 3112.495 |

|                                                                           |          |          |
|---------------------------------------------------------------------------|----------|----------|
| $[\text{Ag}_{17}(\text{C}_4\text{H}_9\text{S})_{10}(\text{NO}_3)_8]^-$    | 3221.720 | 3221.710 |
| $[\text{Ag}_{18}(\text{C}_4\text{H}_9\text{S})_{10}(\text{NO}_3)_9]^-$    | 3391.609 | 3391.606 |
| $[\text{Ag}_{19}(\text{C}_4\text{H}_9\text{S})_{10}(\text{NO}_3)_{10}]^-$ | 3561.504 | 3561.495 |
| $[\text{Ag}_{20}(\text{C}_4\text{H}_9\text{S})_{10}(\text{NO}_3)_{11}]^-$ | 3731.389 | 3731.392 |
| $[\text{Ag}_{21}(\text{C}_4\text{H}_9\text{S})_{10}(\text{NO}_3)_{12}]^-$ | 3901.286 | 3901.282 |

**Fig. S12.** The comparison of observed and calculated isotopic patterns for the spectrum of **1** presented in Fig. S11.

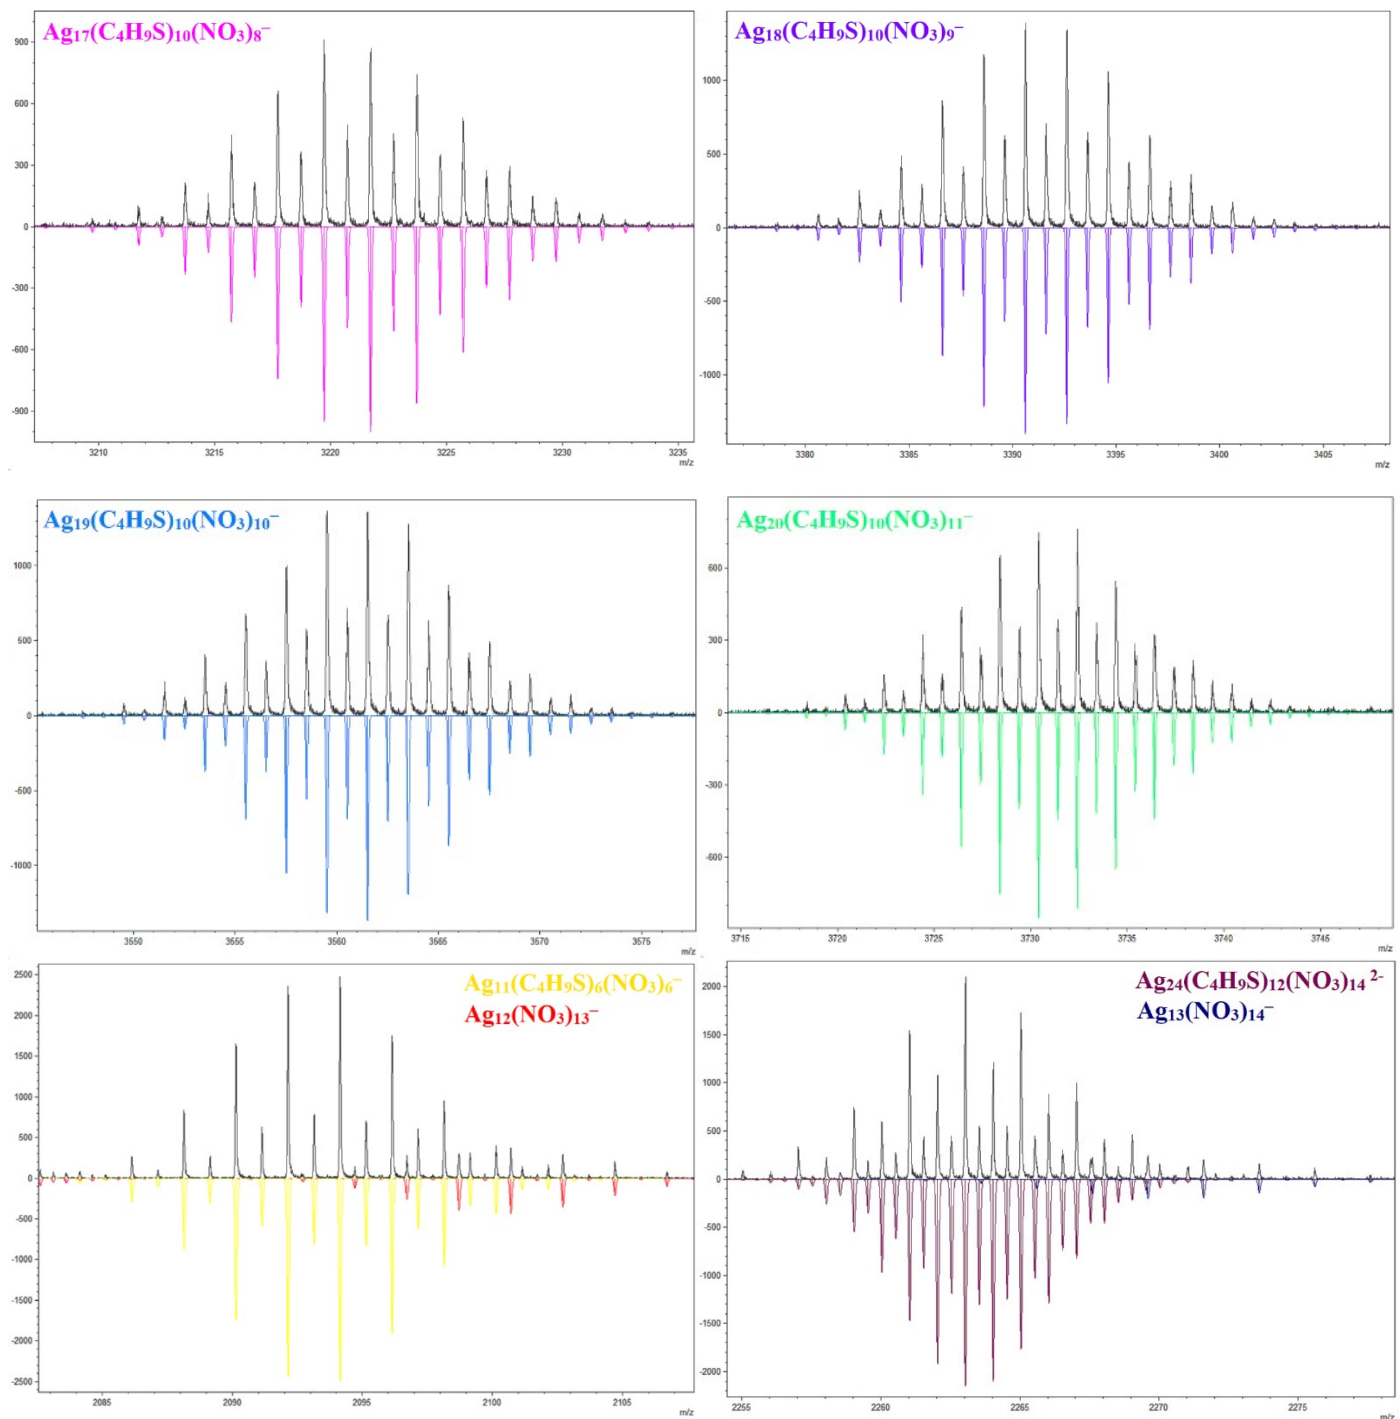

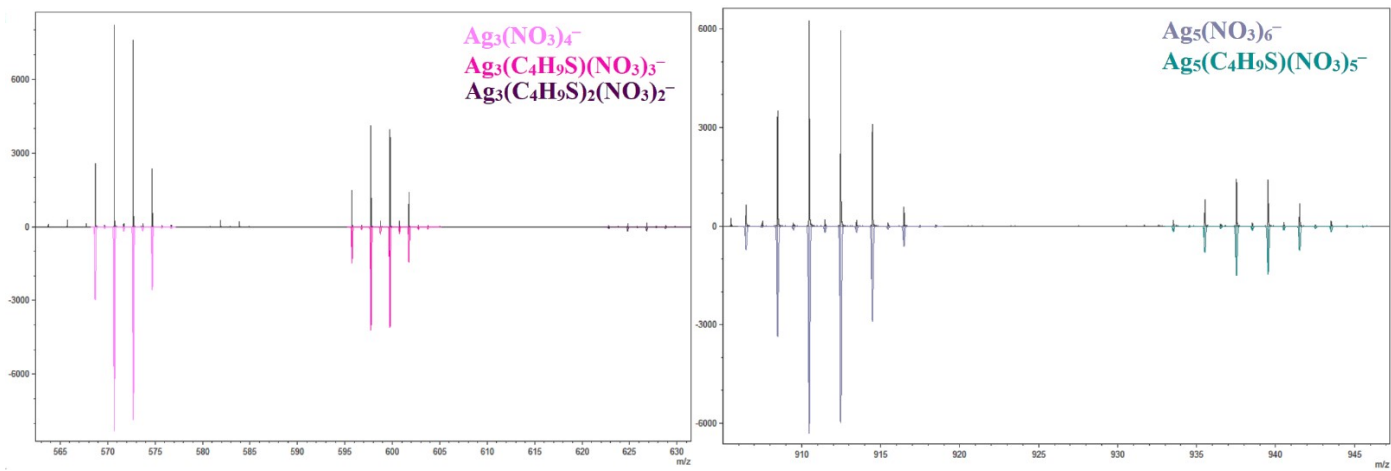

**Fig. S13.** Full HR-ESI-MS(+) spectrum of **1** in CH<sub>3</sub>CN solution.

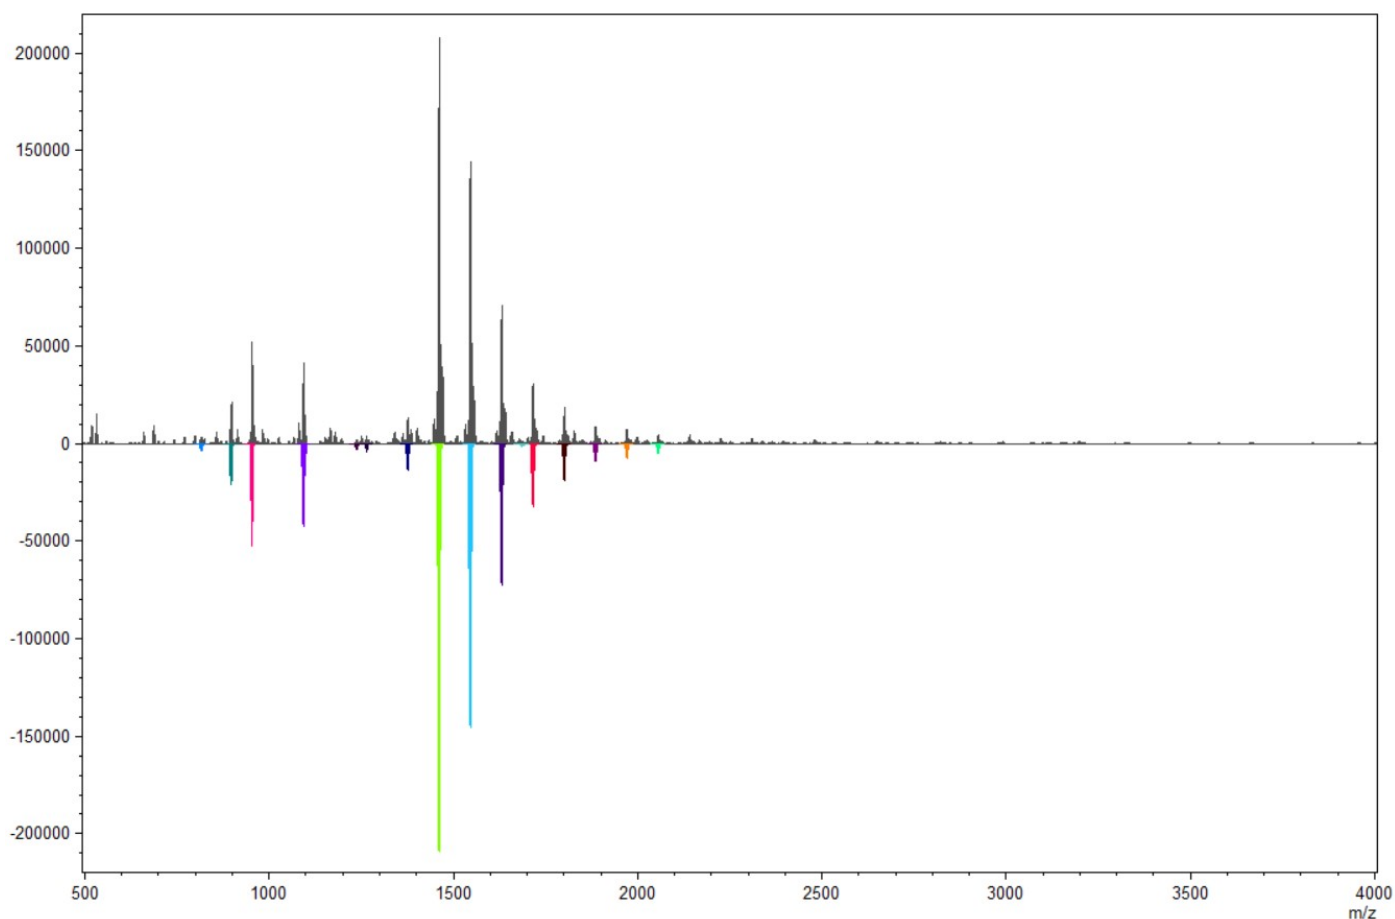

**Table S4.** Peak assignment for the spectrum of **1** presented in Fig. S13.

| cation                                                                                                            | m/z exp  | m/z calc |
|-------------------------------------------------------------------------------------------------------------------|----------|----------|
| [Ag <sub>5</sub> (C <sub>4</sub> H <sub>9</sub> S)(NO <sub>3</sub> ) <sub>3</sub> ] <sup>+</sup>                  | 814.531  | 814.532  |
| [Ag <sub>10</sub> (C <sub>4</sub> H <sub>9</sub> S) <sub>8</sub> ] <sup>2+</sup>                                  | 896.192  | 896.195  |
| [Ag <sub>16</sub> (C <sub>4</sub> H <sub>9</sub> S) <sub>12</sub> (NO <sub>3</sub> ) <sub>3</sub> ] <sup>3+</sup> | 952.661  | 952.659  |
| [Ag <sub>6</sub> (C <sub>4</sub> H <sub>9</sub> S) <sub>5</sub> ] <sup>+</sup>                                    | 1092.638 | 1092.641 |
| [Ag <sub>7</sub> (C <sub>4</sub> H <sub>9</sub> S) <sub>4</sub> (NO <sub>3</sub> ) <sub>2</sub> ] <sup>+</sup>    | 1235.475 | 1235.482 |
| [Ag <sub>14</sub> (C <sub>4</sub> H <sub>9</sub> S) <sub>10</sub> (NO <sub>3</sub> ) <sub>2</sub> ] <sup>2+</sup> | 1264.035 | 1264.043 |
| [Ag <sub>15</sub> (C <sub>4</sub> H <sub>9</sub> S) <sub>12</sub> (NO <sub>3</sub> ) <sub>2</sub> ] <sup>2+</sup> | 1375.036 | 1375.035 |
| [Ag <sub>16</sub> (C <sub>4</sub> H <sub>9</sub> S) <sub>12</sub> (NO <sub>3</sub> ) <sub>2</sub> ] <sup>2+</sup> | 1459.983 | 1459.982 |
| [Ag <sub>17</sub> (C <sub>4</sub> H <sub>9</sub> S) <sub>12</sub> (NO <sub>3</sub> ) <sub>3</sub> ] <sup>2+</sup> | 1544.926 | 1544.928 |
| [Ag <sub>18</sub> (C <sub>4</sub> H <sub>9</sub> S) <sub>12</sub> (NO <sub>3</sub> ) <sub>4</sub> ] <sup>2+</sup> | 1629.873 | 1629.875 |
| [Ag <sub>19</sub> (C <sub>4</sub> H <sub>9</sub> S) <sub>12</sub> (NO <sub>3</sub> ) <sub>5</sub> ] <sup>2+</sup> | 1714.819 | 1714.820 |
| [Ag <sub>20</sub> (C <sub>4</sub> H <sub>9</sub> S) <sub>12</sub> (NO <sub>3</sub> ) <sub>6</sub> ] <sup>2+</sup> | 1799.769 | 1799.768 |
| [Ag <sub>21</sub> (C <sub>4</sub> H <sub>9</sub> S) <sub>12</sub> (NO <sub>3</sub> ) <sub>7</sub> ] <sup>2+</sup> | 1884.715 | 1884.713 |
| [Ag <sub>22</sub> (C <sub>4</sub> H <sub>9</sub> S) <sub>12</sub> (NO <sub>3</sub> ) <sub>8</sub> ] <sup>2+</sup> | 1969.665 | 1969.660 |
| [Ag <sub>23</sub> (C <sub>4</sub> H <sub>9</sub> S) <sub>12</sub> (NO <sub>3</sub> ) <sub>9</sub> ] <sup>2+</sup> | 2054.604 | 2054.606 |

**Fig. S14.** The comparison of observed and calculated isotopic patterns for the spectrum of **1** presented in Fig. S13.

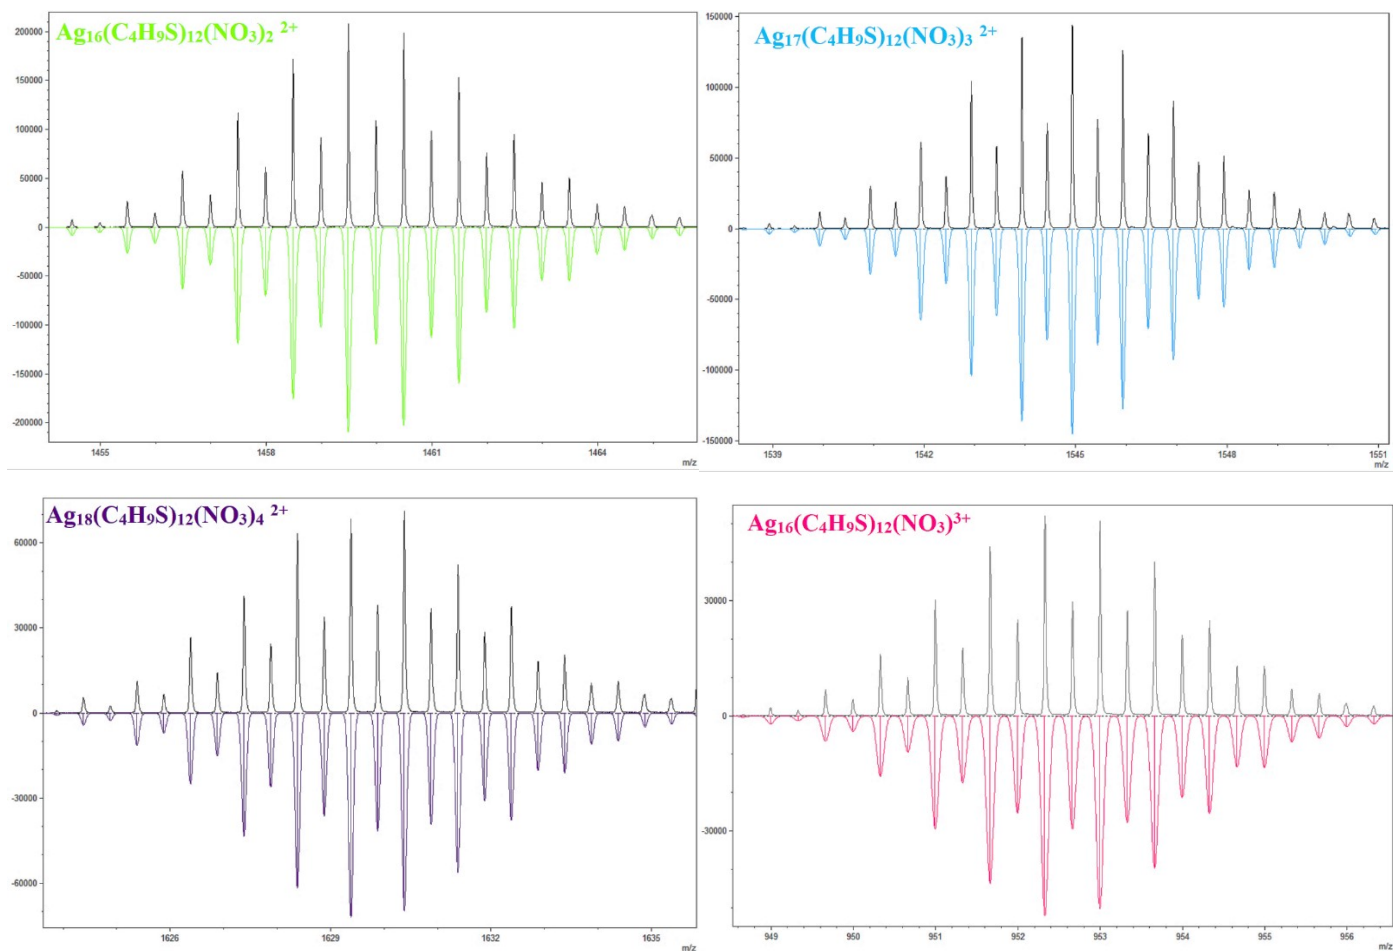

**Fig. S15.** Full HR-ESI-MS(+) spectrum of **1** in CH<sub>3</sub>CN solution after some period of time.

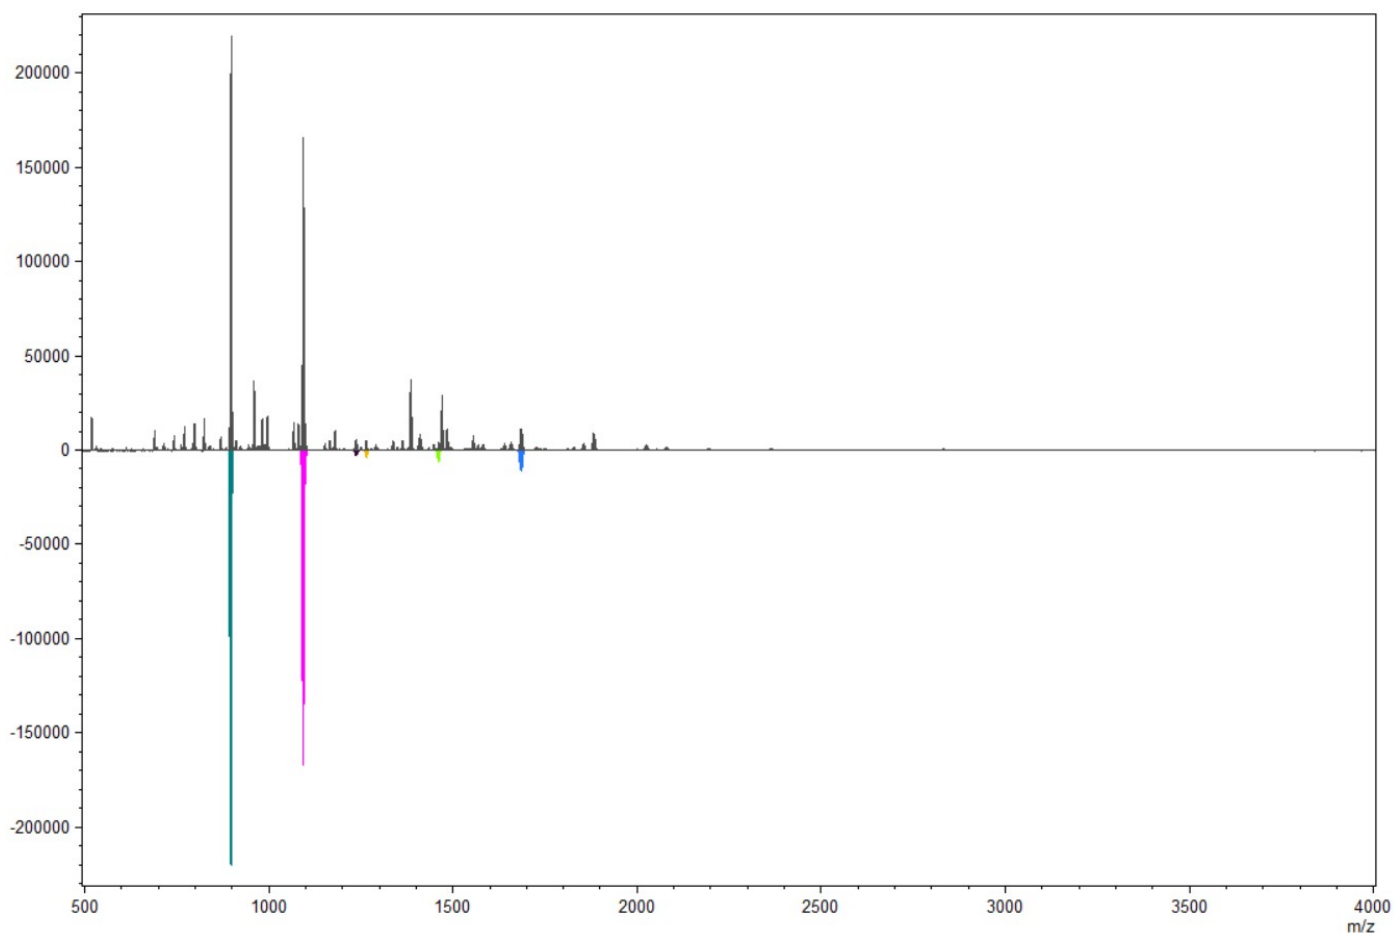

**Table S5.** Peak assignment for the spectrum of **1** presented in Fig. S15.

| cation                                                                                                            | m/z exp  | m/z calc |
|-------------------------------------------------------------------------------------------------------------------|----------|----------|
| [Ag <sub>10</sub> (C <sub>4</sub> H <sub>9</sub> S) <sub>8</sub> ] <sup>2+</sup>                                  | 896.197  | 896.195  |
| [Ag <sub>6</sub> (C <sub>4</sub> H <sub>9</sub> S) <sub>5</sub> ] <sup>+</sup>                                    | 1092.643 | 1092.641 |
| [Ag <sub>7</sub> (C <sub>4</sub> H <sub>9</sub> S) <sub>4</sub> (NO <sub>3</sub> ) <sub>2</sub> ] <sup>+</sup>    | 1253.480 | 1235.482 |
| [Ag <sub>14</sub> (C <sub>4</sub> H <sub>9</sub> S) <sub>10</sub> (NO <sub>3</sub> ) <sub>2</sub> ] <sup>2+</sup> | 1264.035 | 1264.043 |
| [Ag <sub>16</sub> (C <sub>4</sub> H <sub>9</sub> S) <sub>12</sub> (NO <sub>3</sub> ) <sub>2</sub> ] <sup>2+</sup> | 1459.987 | 1459.982 |
| [Ag <sub>9</sub> (C <sub>4</sub> H <sub>9</sub> S) <sub>8</sub> ] <sup>+</sup>                                    | 1684.485 | 1684.483 |

**Fig. S16.** The comparison of observed and calculated isotopic patterns for the spectrum of **1** presented in Fig. S15.

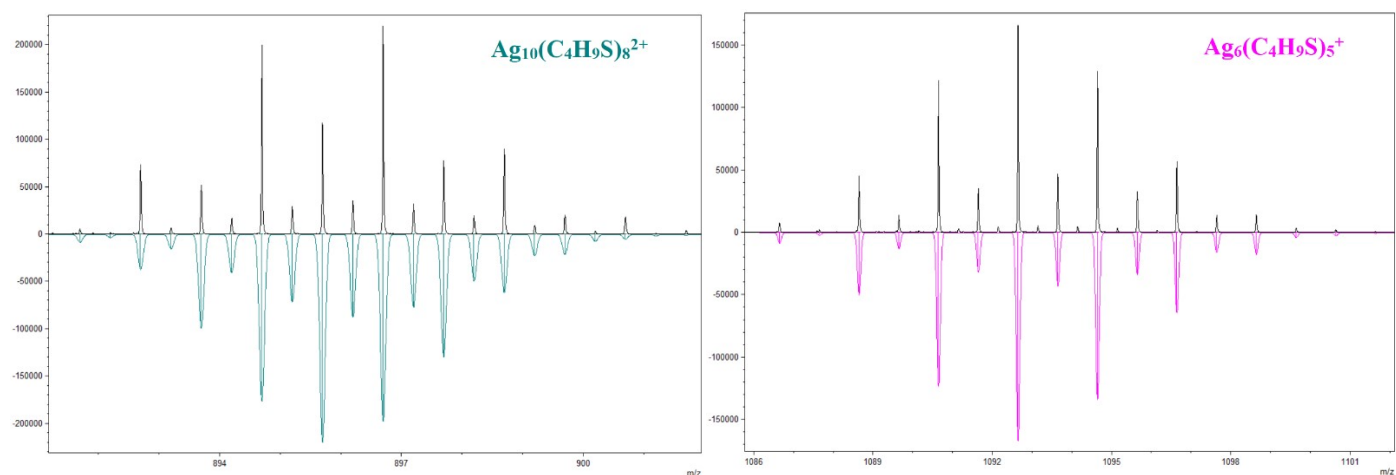

**Fig. S17.** Full HR-ESI-MS(-) spectrum of **2** in CH<sub>3</sub>CN solution.

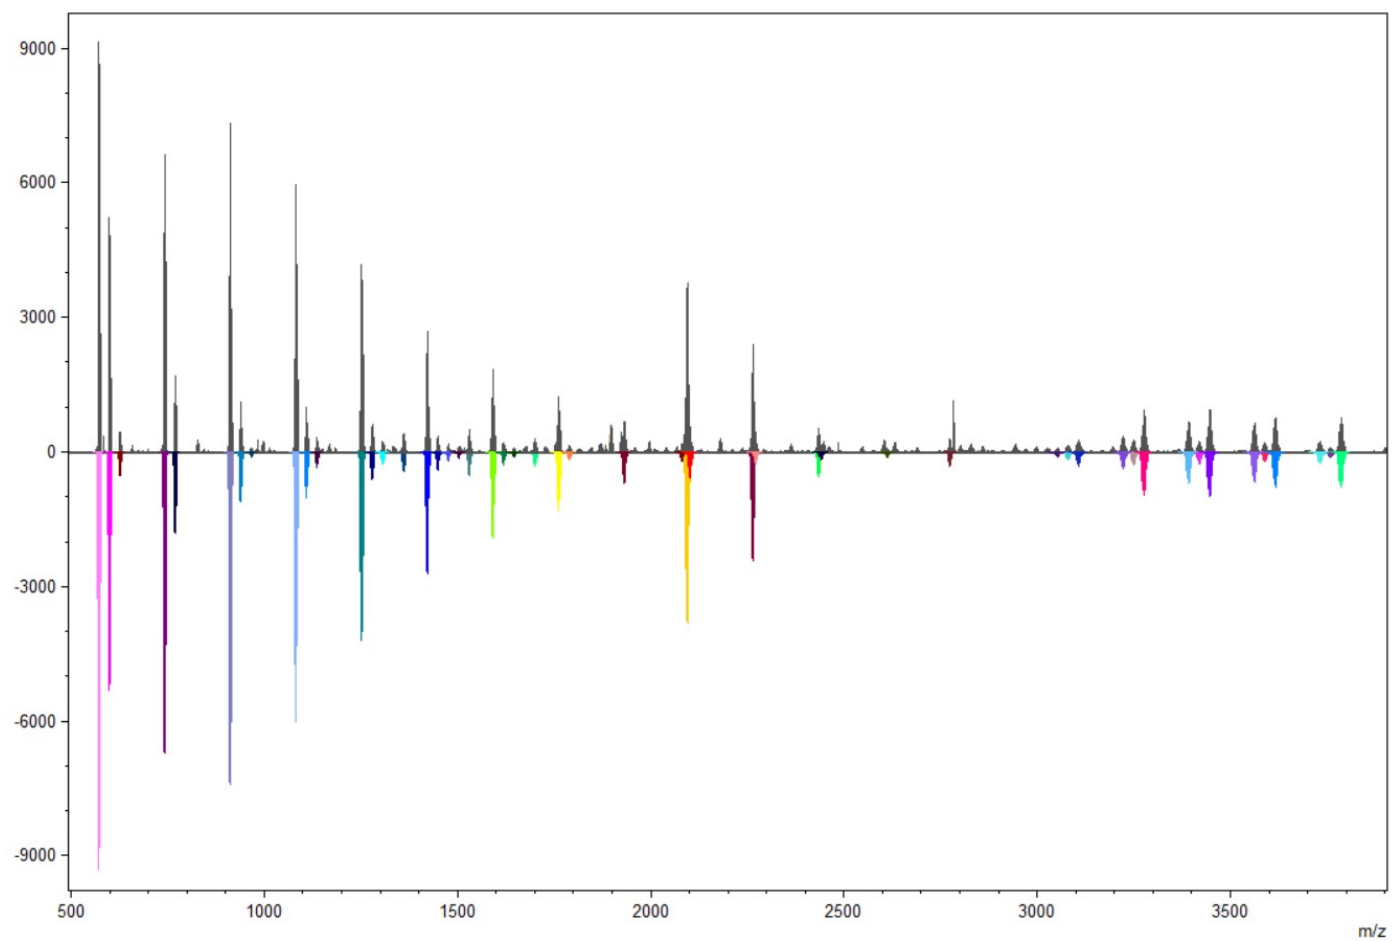

**Table S6.** Peak assignment for the spectrum of **2** presented in Fig. S17.

| anion                                                                                                              | m/z exp  | m/z calc |
|--------------------------------------------------------------------------------------------------------------------|----------|----------|
| [Ag <sub>3</sub> (NO <sub>3</sub> ) <sub>4</sub> ] <sup>-</sup>                                                    | 571.662  | 571.666  |
| [Ag <sub>3</sub> (C <sub>4</sub> H <sub>9</sub> S)(NO <sub>3</sub> ) <sub>3</sub> ] <sup>-</sup>                   | 598.722  | 598.723  |
| [Ag <sub>3</sub> (C <sub>4</sub> H <sub>9</sub> S) <sub>2</sub> (NO <sub>3</sub> ) <sub>2</sub> ] <sup>-</sup>     | 625.784  | 625.778  |
| [Ag <sub>4</sub> (NO <sub>3</sub> ) <sub>5</sub> ] <sup>-</sup>                                                    | 741.559  | 741.560  |
| [Ag <sub>4</sub> (C <sub>4</sub> H <sub>9</sub> S)(NO <sub>3</sub> ) <sub>4</sub> ] <sup>-</sup>                   | 768.611  | 768.614  |
| [Ag <sub>5</sub> (NO <sub>3</sub> ) <sub>6</sub> ] <sup>-</sup>                                                    | 911.455  | 911.451  |
| [Ag <sub>5</sub> (C <sub>4</sub> H <sub>9</sub> S)(NO <sub>3</sub> ) <sub>5</sub> ] <sup>-</sup>                   | 938.514  | 938.508  |
| [Ag <sub>5</sub> (C <sub>4</sub> H <sub>9</sub> S) <sub>2</sub> (NO <sub>3</sub> ) <sub>4</sub> ] <sup>-</sup>     | 965.568  | 965.563  |
| [Ag <sub>6</sub> (NO <sub>3</sub> ) <sub>7</sub> ] <sup>-</sup>                                                    | 1081.341 | 1081.345 |
| [Ag <sub>6</sub> (C <sub>4</sub> H <sub>9</sub> S)(NO <sub>3</sub> ) <sub>6</sub> ] <sup>-</sup>                   | 1108.400 | 1108.400 |
| [Ag <sub>6</sub> (C <sub>4</sub> H <sub>9</sub> S) <sub>2</sub> (NO <sub>3</sub> ) <sub>5</sub> ] <sup>-</sup>     | 1135.452 | 1135.454 |
| [Ag <sub>7</sub> (NO <sub>3</sub> ) <sub>8</sub> ] <sup>-</sup>                                                    | 1251.236 | 1251.237 |
| [Ag <sub>7</sub> (C <sub>4</sub> H <sub>9</sub> S)(NO <sub>3</sub> ) <sub>7</sub> ] <sup>-</sup>                   | 1278.294 | 1278.294 |
| [Ag <sub>7</sub> (C <sub>4</sub> H <sub>9</sub> S) <sub>2</sub> (NO <sub>3</sub> ) <sub>6</sub> ] <sup>-</sup>     | 1305.352 | 1305.349 |
| [Ag <sub>7</sub> (C <sub>4</sub> H <sub>9</sub> S) <sub>4</sub> (NO <sub>3</sub> ) <sub>4</sub> ] <sup>-</sup>     | 1359.461 | 1359.458 |
| [Ag <sub>8</sub> (NO <sub>3</sub> ) <sub>9</sub> ] <sup>-</sup>                                                    | 1421.126 | 1421.131 |
| [Ag <sub>8</sub> (C <sub>4</sub> H <sub>9</sub> S)(NO <sub>3</sub> ) <sub>8</sub> ] <sup>-</sup>                   | 1448.176 | 1448.185 |
| [Ag <sub>8</sub> (C <sub>4</sub> H <sub>9</sub> S) <sub>2</sub> (NO <sub>3</sub> ) <sub>7</sub> ] <sup>-</sup>     | 1475.238 | 1475.240 |
| [Ag <sub>8</sub> (C <sub>4</sub> H <sub>9</sub> S) <sub>3</sub> (NO <sub>3</sub> ) <sub>6</sub> ] <sup>-</sup>     | 1502.289 | 1502.294 |
| [Ag <sub>8</sub> (C <sub>4</sub> H <sub>9</sub> S) <sub>4</sub> (NO <sub>3</sub> ) <sub>5</sub> ] <sup>-</sup>     | 1529.351 | 1529.345 |
| [Ag <sub>9</sub> (NO <sub>3</sub> ) <sub>10</sub> ] <sup>-</sup>                                                   | 1591.026 | 1591.022 |
| [Ag <sub>9</sub> (C <sub>4</sub> H <sub>9</sub> S)(NO <sub>3</sub> ) <sub>9</sub> ] <sup>-</sup>                   | 1618.071 | 1618.079 |
| [Ag <sub>9</sub> (C <sub>4</sub> H <sub>9</sub> S) <sub>2</sub> (NO <sub>3</sub> ) <sub>8</sub> ] <sup>-</sup>     | 1645.133 | 1645.134 |
| [Ag <sub>9</sub> (C <sub>4</sub> H <sub>9</sub> S) <sub>4</sub> (NO <sub>3</sub> ) <sub>6</sub> ] <sup>-</sup>     | 1699.243 | 1699.244 |
| [Ag <sub>10</sub> (NO <sub>3</sub> ) <sub>11</sub> ] <sup>-</sup>                                                  | 1760.912 | 1760.916 |
| [Ag <sub>10</sub> (C <sub>4</sub> H <sub>9</sub> S)(NO <sub>3</sub> ) <sub>10</sub> ] <sup>-</sup>                 | 1787.971 | 1787.971 |
| [Ag <sub>10</sub> (C <sub>4</sub> H <sub>9</sub> S) <sub>4</sub> (NO <sub>3</sub> ) <sub>7</sub> ] <sup>-</sup>    | 1869.129 | 1869.134 |
| [Ag <sub>20</sub> (C <sub>4</sub> H <sub>9</sub> S) <sub>10</sub> (NO <sub>3</sub> ) <sub>12</sub> ] <sup>2-</sup> | 1896.686 | 1896.690 |
| [Ag <sub>11</sub> (NO <sub>3</sub> ) <sub>12</sub> ] <sup>-</sup>                                                  | 1930.816 | 1930.808 |
| [Ag <sub>22</sub> (C <sub>4</sub> H <sub>9</sub> S) <sub>11</sub> (NO <sub>3</sub> ) <sub>13</sub> ] <sup>2-</sup> | 2080.097 | 2080.110 |
| [Ag <sub>11</sub> (C <sub>4</sub> H <sub>9</sub> S) <sub>6</sub> (NO <sub>3</sub> ) <sub>6</sub> ] <sup>-</sup>    | 2094.133 | 2094.136 |
| [Ag <sub>12</sub> (NO <sub>3</sub> ) <sub>13</sub> ] <sup>-</sup>                                                  | 2100.695 | 2100.701 |
| [Ag <sub>24</sub> (C <sub>4</sub> H <sub>9</sub> S) <sub>12</sub> (NO <sub>3</sub> ) <sub>14</sub> ] <sup>2-</sup> | 2263.538 | 2263.530 |
| [Ag <sub>13</sub> (NO <sub>3</sub> ) <sub>14</sub> ] <sup>-</sup>                                                  | 2270.588 | 2270.593 |
| [Ag <sub>26</sub> (C <sub>4</sub> H <sub>9</sub> S) <sub>12</sub> (NO <sub>3</sub> ) <sub>16</sub> ] <sup>2-</sup> | 2433.421 | 2433.423 |
| [Ag <sub>14</sub> (NO <sub>3</sub> ) <sub>15</sub> ] <sup>-</sup>                                                  | 2440.481 | 2440.487 |
| [Ag <sub>15</sub> (NO <sub>3</sub> ) <sub>16</sub> ] <sup>-</sup>                                                  | 2610.381 | 2610.379 |
| [Ag <sub>16</sub> (C <sub>4</sub> H <sub>9</sub> S) <sub>10</sub> (NO <sub>3</sub> ) <sub>7</sub> ] <sup>-</sup>   | 3051.824 | 3051.820 |
| [Ag <sub>16</sub> (C <sub>4</sub> H <sub>9</sub> S) <sub>11</sub> (NO <sub>3</sub> ) <sub>6</sub> ] <sup>-</sup>   | 3078.880 | 3078.875 |
| [Ag <sub>16</sub> (C <sub>4</sub> H <sub>9</sub> S) <sub>12</sub> (NO <sub>3</sub> ) <sub>5</sub> ] <sup>-</sup>   | 3105.922 | 3105.930 |
| [Ag <sub>17</sub> (C <sub>4</sub> H <sub>9</sub> S) <sub>10</sub> (NO <sub>3</sub> ) <sub>8</sub> ] <sup>-</sup>   | 3221.719 | 3221.711 |
| [Ag <sub>17</sub> (C <sub>4</sub> H <sub>9</sub> S) <sub>11</sub> (NO <sub>3</sub> ) <sub>7</sub> ] <sup>-</sup>   | 3248.764 | 3248.765 |
| [Ag <sub>17</sub> (C <sub>4</sub> H <sub>9</sub> S) <sub>12</sub> (NO <sub>3</sub> ) <sub>6</sub> ] <sup>-</sup>   | 3275.819 | 3275.820 |
| [Ag <sub>18</sub> (C <sub>4</sub> H <sub>9</sub> S) <sub>10</sub> (NO <sub>3</sub> ) <sub>9</sub> ] <sup>-</sup>   | 3391.607 | 3391.606 |
| [Ag <sub>18</sub> (C <sub>4</sub> H <sub>9</sub> S) <sub>11</sub> (NO <sub>3</sub> ) <sub>8</sub> ] <sup>-</sup>   | 3418.657 | 3418.661 |
| [Ag <sub>18</sub> (C <sub>4</sub> H <sub>9</sub> S) <sub>12</sub> (NO <sub>3</sub> ) <sub>7</sub> ] <sup>-</sup>   | 3445.718 | 3445.715 |
| [Ag <sub>19</sub> (C <sub>4</sub> H <sub>9</sub> S) <sub>10</sub> (NO <sub>3</sub> ) <sub>10</sub> ] <sup>-</sup>  | 3561.499 | 3561.496 |
| [Ag <sub>19</sub> (C <sub>4</sub> H <sub>9</sub> S) <sub>11</sub> (NO <sub>3</sub> ) <sub>9</sub> ] <sup>-</sup>   | 3588.546 | 3588.551 |
| [Ag <sub>19</sub> (C <sub>4</sub> H <sub>9</sub> S) <sub>12</sub> (NO <sub>3</sub> ) <sub>8</sub> ] <sup>-</sup>   | 3615.603 | 3615.606 |



|                                                                           |          |          |
|---------------------------------------------------------------------------|----------|----------|
| $[\text{Ag}_{20}(\text{C}_4\text{H}_9\text{S})_{10}(\text{NO}_3)_{11}]^-$ | 3731.397 | 3731.392 |
| $[\text{Ag}_{20}(\text{C}_4\text{H}_9\text{S})_{11}(\text{NO}_3)_{10}]^-$ | 3758.444 | 3758.446 |
| $[\text{Ag}_{20}(\text{C}_4\text{H}_9\text{S})_{12}(\text{NO}_3)_9]^-$    | 3785.511 | 3785.500 |

**Fig. S18.** The comparison of observed and calculated isotopic patterns for the spectrum of **2** presented in Fig. S17.

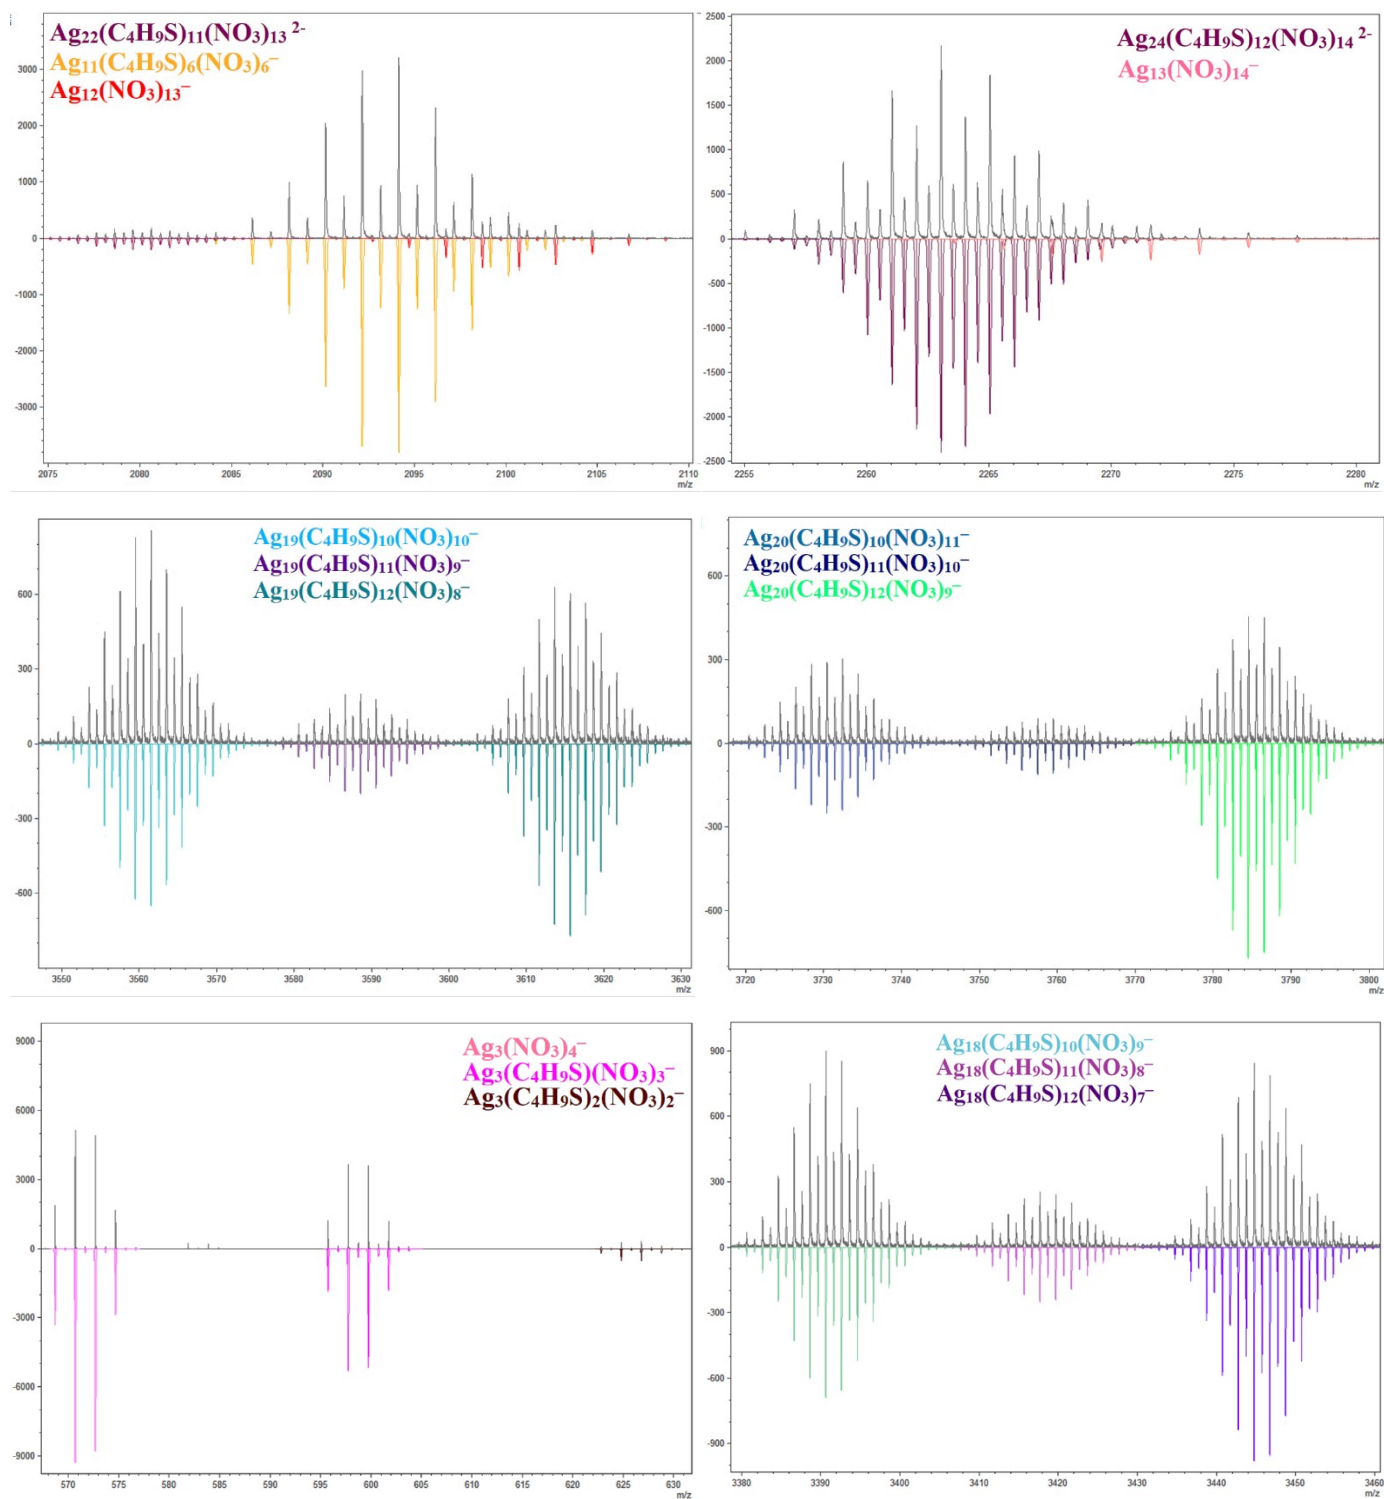

**Fig. S19.** Full HR-ESI-MS(+) spectrum of **2** in CH<sub>3</sub>CN solution.

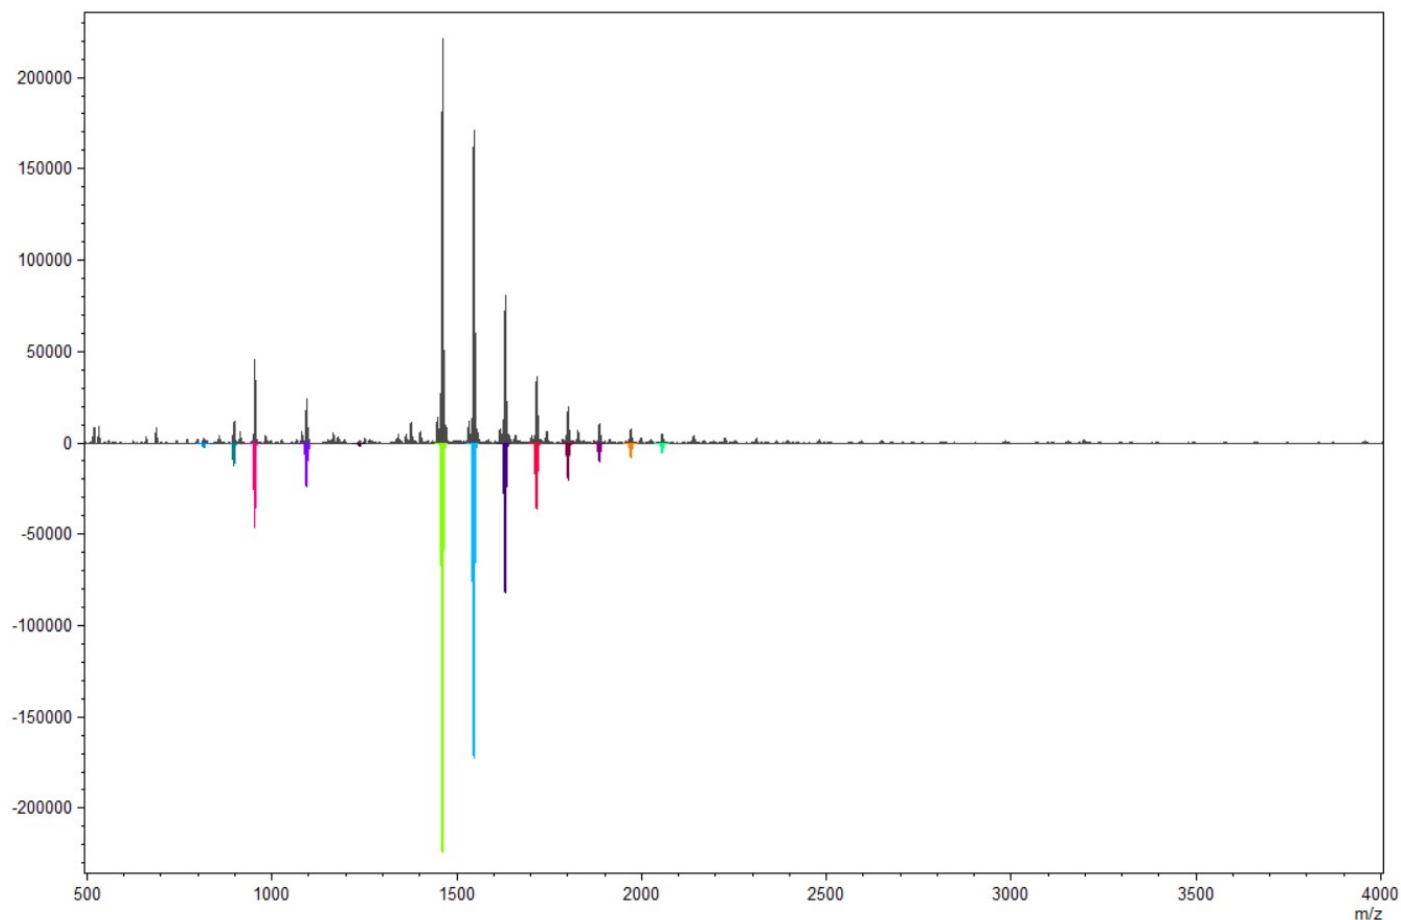

**Table S7.** Peak assignment for the spectrum of **2** presented in Fig. S19.

| cation                                                                                                            | m/z exp  | m/z calc |
|-------------------------------------------------------------------------------------------------------------------|----------|----------|
| [Ag <sub>5</sub> (C <sub>4</sub> H <sub>9</sub> S)(NO <sub>3</sub> ) <sub>3</sub> ] <sup>+</sup>                  | 814.527  | 814.532  |
| [Ag <sub>10</sub> (C <sub>4</sub> H <sub>9</sub> S) <sub>8</sub> ] <sup>2+</sup>                                  | 896.192  | 896.195  |
| [Ag <sub>16</sub> (C <sub>4</sub> H <sub>9</sub> S) <sub>12</sub> (NO <sub>3</sub> ) <sub>3</sub> ] <sup>3+</sup> | 952.660  | 952.659  |
| [Ag <sub>6</sub> (C <sub>4</sub> H <sub>9</sub> S) <sub>5</sub> ] <sup>+</sup>                                    | 1092.638 | 1092.641 |
| [Ag <sub>14</sub> (C <sub>4</sub> H <sub>9</sub> S) <sub>10</sub> (NO <sub>3</sub> ) <sub>2</sub> ] <sup>2+</sup> | 1235.986 | 1235.980 |
| [Ag <sub>16</sub> (C <sub>4</sub> H <sub>9</sub> S) <sub>12</sub> (NO <sub>3</sub> ) <sub>2</sub> ] <sup>2+</sup> | 1459.983 | 1459.982 |
| [Ag <sub>17</sub> (C <sub>4</sub> H <sub>9</sub> S) <sub>12</sub> (NO <sub>3</sub> ) <sub>3</sub> ] <sup>2+</sup> | 1544.931 | 1544.928 |
| [Ag <sub>18</sub> (C <sub>4</sub> H <sub>9</sub> S) <sub>12</sub> (NO <sub>3</sub> ) <sub>4</sub> ] <sup>2+</sup> | 1629.873 | 1629.875 |
| [Ag <sub>19</sub> (C <sub>4</sub> H <sub>9</sub> S) <sub>12</sub> (NO <sub>3</sub> ) <sub>5</sub> ] <sup>2+</sup> | 1714.819 | 1714.820 |
| [Ag <sub>20</sub> (C <sub>4</sub> H <sub>9</sub> S) <sub>12</sub> (NO <sub>3</sub> ) <sub>6</sub> ] <sup>2+</sup> | 1799.769 | 1799.768 |
| [Ag <sub>21</sub> (C <sub>4</sub> H <sub>9</sub> S) <sub>12</sub> (NO <sub>3</sub> ) <sub>7</sub> ] <sup>2+</sup> | 1884.715 | 1884.713 |
| [Ag <sub>22</sub> (C <sub>4</sub> H <sub>9</sub> S) <sub>12</sub> (NO <sub>3</sub> ) <sub>8</sub> ] <sup>2+</sup> | 1969.658 | 1969.661 |
| [Ag <sub>23</sub> (C <sub>4</sub> H <sub>9</sub> S) <sub>12</sub> (NO <sub>3</sub> ) <sub>9</sub> ] <sup>2+</sup> | 2054.610 | 2054.606 |

**Fig. S20.** The comparison of observed and calculated isotopic patterns for the spectrum of **2** presented in Fig. S19.

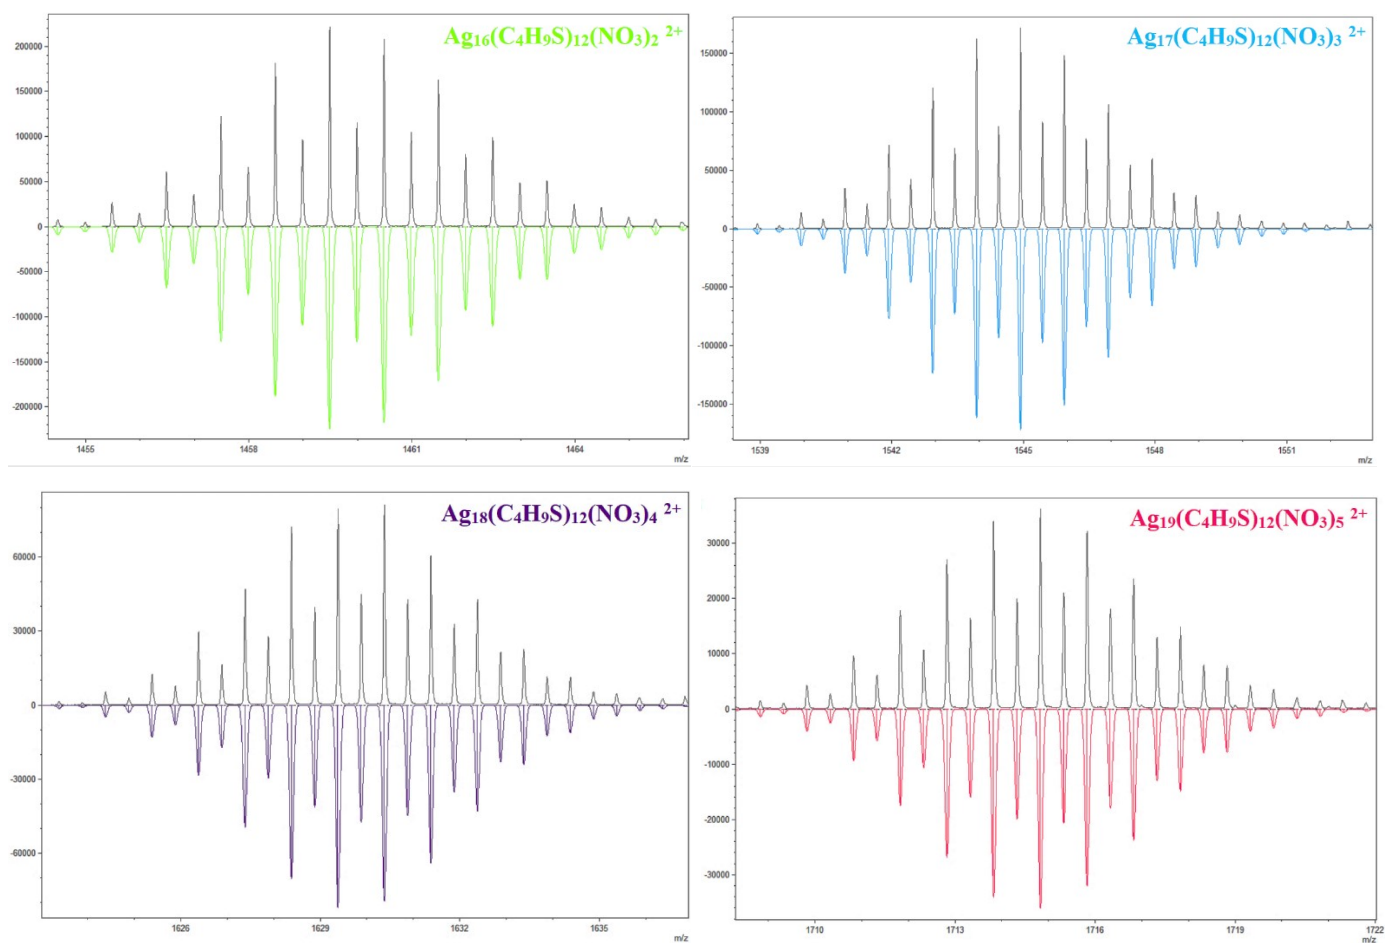

**Fig. S21.** Full HR-ESI-MS(+) spectrum of **2** in CH<sub>3</sub>CN solution after some period of time.

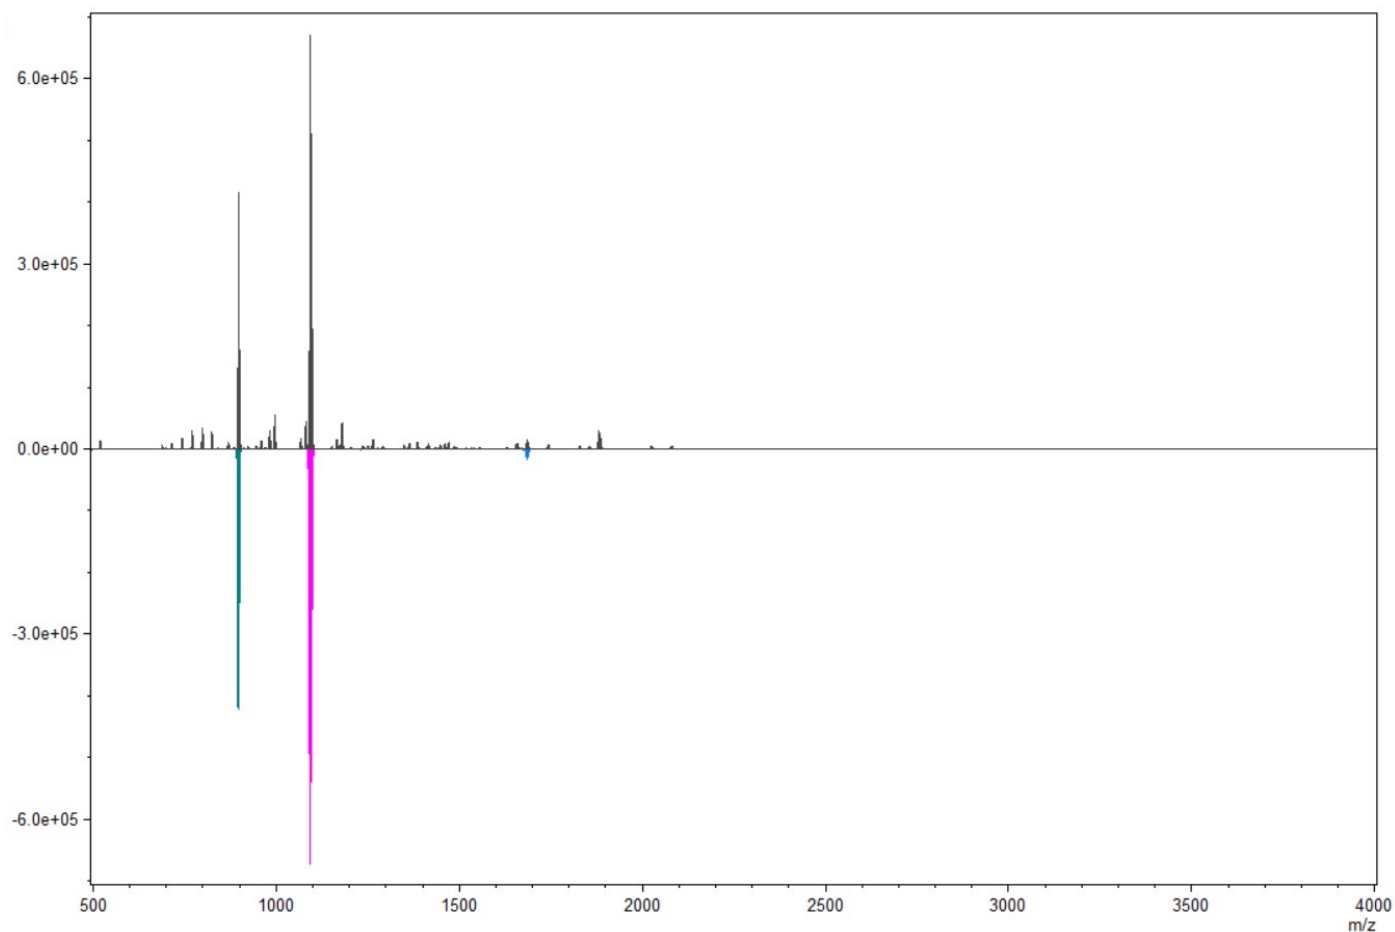

**Table S8.** Peak assignment for the spectrum of **2** presented in Fig. S21.

| cation                                                                           | m/z exp  | m/z calc |
|----------------------------------------------------------------------------------|----------|----------|
| [Ag <sub>10</sub> (C <sub>4</sub> H <sub>9</sub> S) <sub>8</sub> ] <sup>2+</sup> | 896.197  | 896.195  |
| [Ag <sub>6</sub> (C <sub>4</sub> H <sub>9</sub> S) <sub>5</sub> ] <sup>+</sup>   | 1092.643 | 1092.641 |
| [Ag <sub>9</sub> (C <sub>4</sub> H <sub>9</sub> S) <sub>8</sub> ] <sup>+</sup>   | 1684.485 | 1684.483 |

**Fig. S22.** The comparison of observed and calculated isotopic patterns for the spectrum of **2** presented in Fig. S21.

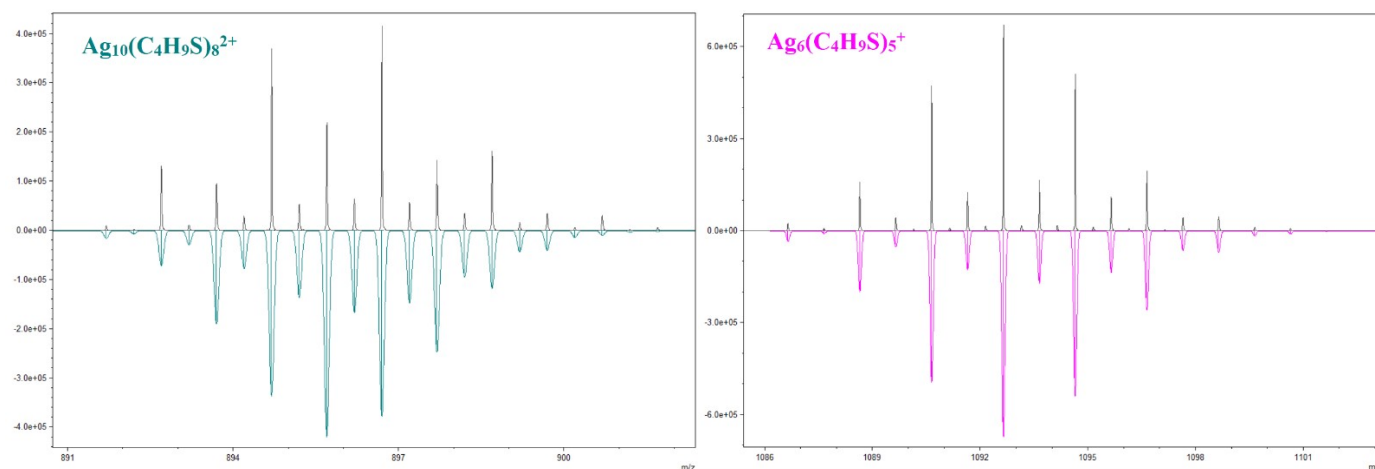

**Fig. S23.** Full HR-ESI-MS(-) spectrum of **3** in CH<sub>3</sub>CN solution.

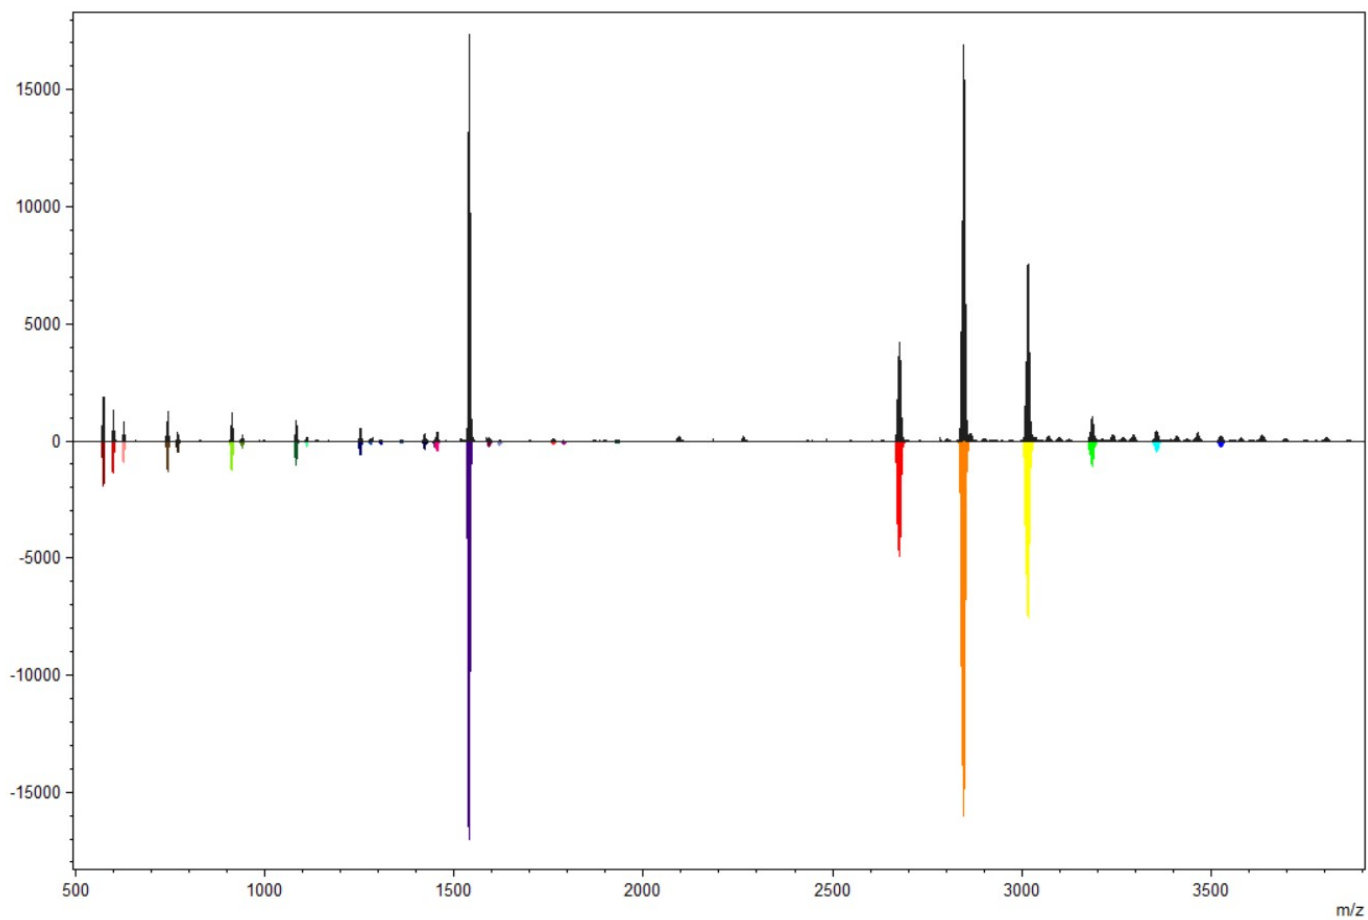

**Table S9.** Peak assignment for the spectrum of **3** presented in Fig. S23.

| anion                                                                                                              | m/z exp  | m/z calc |
|--------------------------------------------------------------------------------------------------------------------|----------|----------|
| [Ag <sub>3</sub> (NO <sub>3</sub> ) <sub>4</sub> ] <sup>-</sup>                                                    | 571.662  | 571.664  |
| [Ag <sub>3</sub> (C <sub>4</sub> H <sub>9</sub> S)(NO <sub>3</sub> ) <sub>3</sub> ] <sup>-</sup>                   | 598.721  | 598.722  |
| [Ag <sub>3</sub> (C <sub>4</sub> H <sub>9</sub> S) <sub>2</sub> (NO <sub>3</sub> ) <sub>2</sub> ] <sup>-</sup>     | 625.777  | 625.778  |
| [Ag <sub>4</sub> (NO <sub>3</sub> ) <sub>5</sub> ] <sup>-</sup>                                                    | 741.558  | 741.559  |
| [Ag <sub>4</sub> (C <sub>4</sub> H <sub>9</sub> S)(NO <sub>3</sub> ) <sub>4</sub> ] <sup>-</sup>                   | 768.612  | 768.614  |
| [Ag <sub>5</sub> (NO <sub>3</sub> ) <sub>6</sub> ] <sup>-</sup>                                                    | 911.448  | 911.451  |
| [Ag <sub>5</sub> (C <sub>4</sub> H <sub>9</sub> S)(NO <sub>3</sub> ) <sub>5</sub> ] <sup>-</sup>                   | 938.502  | 938.508  |
| [Ag <sub>6</sub> (NO <sub>3</sub> ) <sub>7</sub> ] <sup>-</sup>                                                    | 1081.342 | 1081.345 |
| [Ag <sub>6</sub> (C <sub>4</sub> H <sub>9</sub> S)(NO <sub>3</sub> ) <sub>6</sub> ] <sup>-</sup>                   | 1108.402 | 1108.399 |
| [Ag <sub>7</sub> (NO <sub>3</sub> ) <sub>8</sub> ] <sup>-</sup>                                                    | 1251.242 | 1251.237 |
| [Ag <sub>7</sub> (C <sub>4</sub> H <sub>9</sub> S)(NO <sub>3</sub> ) <sub>7</sub> ] <sup>-</sup>                   | 1278.290 | 1278.293 |
| [Ag <sub>7</sub> (C <sub>4</sub> H <sub>9</sub> S) <sub>2</sub> (NO <sub>3</sub> ) <sub>6</sub> ] <sup>-</sup>     | 1305.353 | 1305.348 |
| [Ag <sub>7</sub> (C <sub>4</sub> H <sub>9</sub> S) <sub>4</sub> (NO <sub>3</sub> ) <sub>4</sub> ] <sup>-</sup>     | 1359.467 | 1359.458 |
| [Ag <sub>8</sub> (NO <sub>3</sub> ) <sub>9</sub> ] <sup>-</sup>                                                    | 1421.127 | 1421.130 |
| [Ag <sub>8</sub> (C <sub>4</sub> H <sub>9</sub> S)(NO <sub>3</sub> ) <sub>8</sub> ] <sup>-</sup>                   | 1448.177 | 1448.185 |
| [Ag <sub>15</sub> (C <sub>4</sub> H <sub>9</sub> S) <sub>8</sub> (NO <sub>3</sub> ) <sub>8</sub> Br] <sup>2-</sup> | 1453.866 | 1453.868 |
| [Ag <sub>16</sub> (C <sub>4</sub> H <sub>9</sub> S) <sub>8</sub> (NO <sub>3</sub> ) <sub>9</sub> Br] <sup>2-</sup> | 1538.809 | 1538.813 |
| [Ag <sub>9</sub> (NO <sub>3</sub> ) <sub>10</sub> ] <sup>-</sup>                                                   | 1591.017 | 1591.022 |
| [Ag <sub>9</sub> (C <sub>4</sub> H <sub>9</sub> S)(NO <sub>3</sub> ) <sub>9</sub> ] <sup>-</sup>                   | 1618.078 | 1618.079 |
| [Ag <sub>10</sub> (NO <sub>3</sub> ) <sub>11</sub> ] <sup>-</sup>                                                  | 1760.920 | 1760.916 |
| [Ag <sub>10</sub> (C <sub>4</sub> H <sub>9</sub> S)(NO <sub>3</sub> ) <sub>10</sub> ] <sup>-</sup>                 | 1787.982 | 1787.971 |
| [Ag <sub>11</sub> (NO <sub>3</sub> ) <sub>12</sub> ] <sup>-</sup>                                                  | 1930.805 | 1930.807 |
| [Ag <sub>14</sub> (C <sub>4</sub> H <sub>9</sub> S) <sub>8</sub> (NO <sub>3</sub> ) <sub>6</sub> Br] <sup>-</sup>  | 2675.848 | 2675.852 |
| [Ag <sub>15</sub> (C <sub>4</sub> H <sub>9</sub> S) <sub>8</sub> (NO <sub>3</sub> ) <sub>7</sub> Br] <sup>-</sup>  | 2845.751 | 2845.748 |
| [Ag <sub>16</sub> (C <sub>4</sub> H <sub>9</sub> S) <sub>8</sub> (NO <sub>3</sub> ) <sub>8</sub> Br] <sup>-</sup>  | 3015.636 | 3015.637 |
| [Ag <sub>17</sub> (C <sub>4</sub> H <sub>9</sub> S) <sub>8</sub> (NO <sub>3</sub> ) <sub>9</sub> Br] <sup>-</sup>  | 3185.538 | 3185.534 |
| [Ag <sub>18</sub> (C <sub>4</sub> H <sub>9</sub> S) <sub>8</sub> (NO <sub>3</sub> ) <sub>10</sub> Br] <sup>-</sup> | 3355.432 | 3355.423 |
| [Ag <sub>19</sub> (C <sub>4</sub> H <sub>9</sub> S) <sub>8</sub> (NO <sub>3</sub> ) <sub>11</sub> Br] <sup>-</sup> | 3525.327 | 3525.319 |

**Fig. S24.** The comparison of observed and calculated isotopic patterns for the spectrum of **3** presented in Fig. S23.

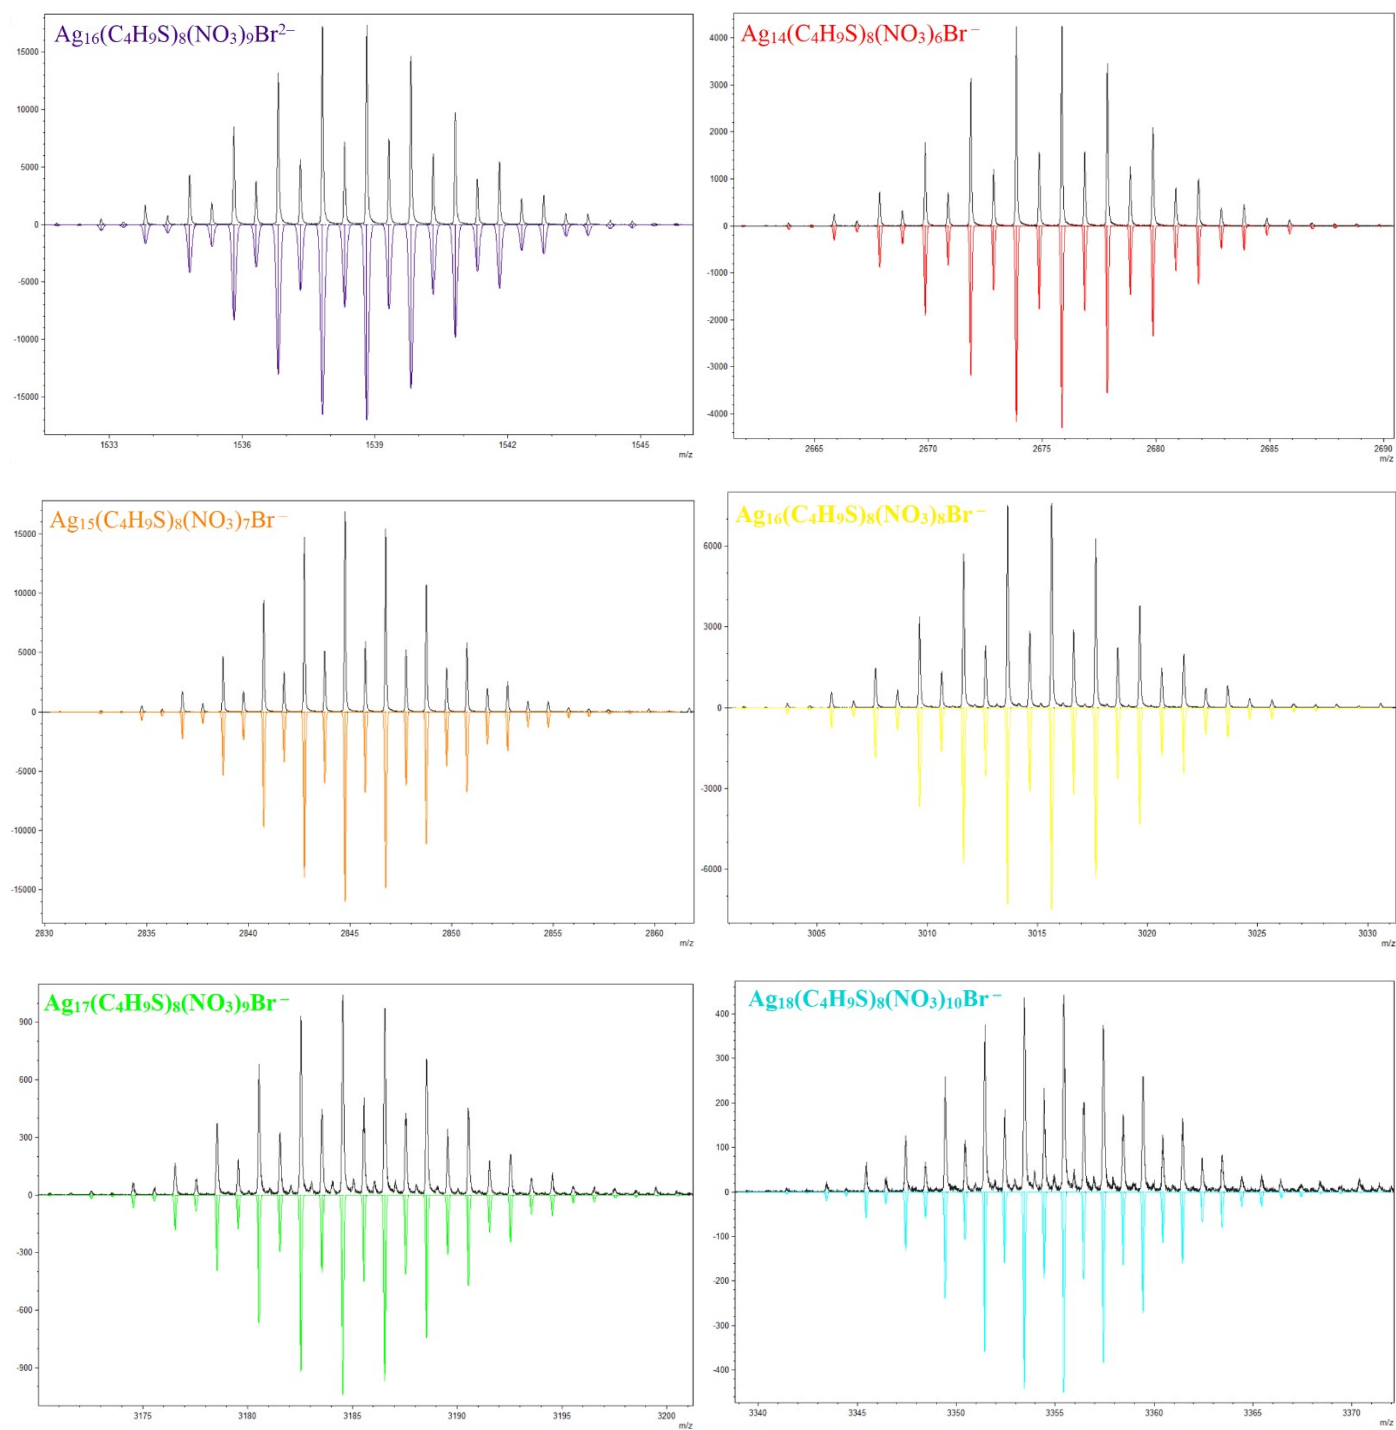

**Fig. S25.** Full HR-ESI-MS(+) spectrum of **3** in CH<sub>3</sub>CN solution.

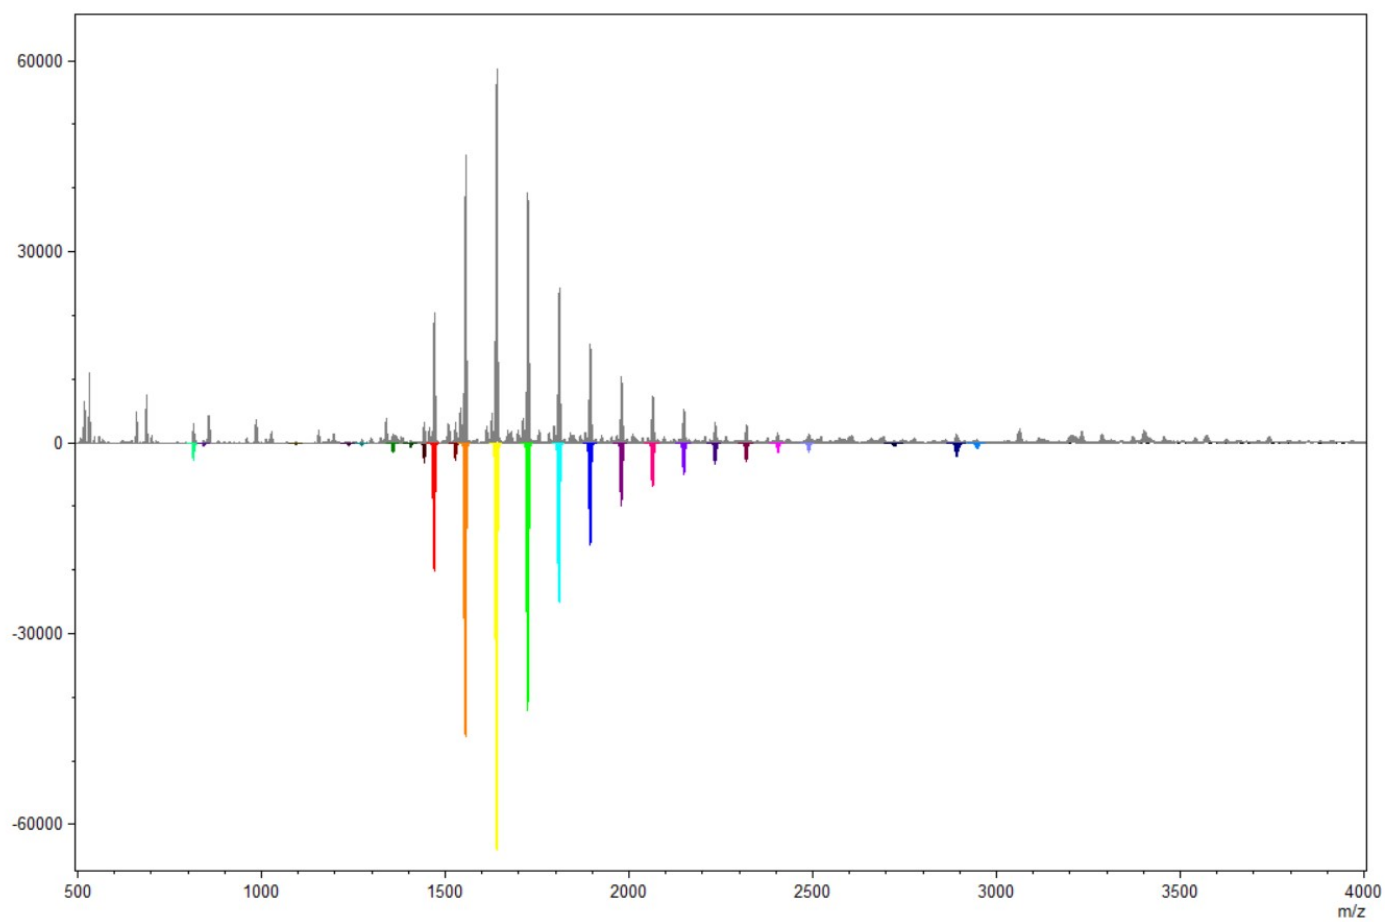



**Table S10.** Peak assignment for the spectrum of **3** presented in Fig. S25.

| cation                                                                                | m/z exp  | m/z calc |
|---------------------------------------------------------------------------------------|----------|----------|
| $[\text{Ag}_5(\text{C}_4\text{H}_9\text{S})(\text{NO}_3)_3]^+$                        | 814.533  | 814.532  |
| $[\text{Ag}_5(\text{C}_4\text{H}_9\text{S})_2(\text{NO}_3)_2]^+$                      | 841.581  | 841.586  |
| $[\text{Ag}_6(\text{C}_4\text{H}_9\text{S})_5]^+$                                     | 1092.638 | 1092.641 |
| $[\text{Ag}_7(\text{C}_4\text{H}_9\text{S})_4(\text{NO}_3)_2]^+$                      | 1235.486 | 1235.482 |
| $[\text{Ag}_{14}(\text{C}_4\text{H}_9\text{S})_8(\text{NO}_3)_4(\text{DMF})]^{2+}$    | 1272.505 | 1272.507 |
| $[\text{Ag}_{15}(\text{C}_4\text{H}_9\text{S})_8(\text{NO}_3)_5(\text{DMF})]^{2+}$    | 1357.447 | 1357.452 |
| $[\text{Ag}_{16}(\text{C}_4\text{H}_9\text{S})_8(\text{NO}_3)_6]^{2+}$                | 1405.882 | 1405.873 |
| $[\text{Ag}_{16}(\text{C}_4\text{H}_9\text{S})_8(\text{NO}_3)_6(\text{DMF})]^{2+}$    | 1442.399 | 1442.400 |
| $[\text{Ag}_{16}(\text{C}_4\text{H}_9\text{S})_{12}(\text{NO}_3)\text{Br}]^{2+}$      | 1468.950 | 1468.946 |
| $[\text{Ag}_{17}(\text{C}_4\text{H}_9\text{S})_8(\text{NO}_3)_7(\text{DMF})]^{2+}$    | 1527.339 | 1527.345 |
| $[\text{Ag}_{17}(\text{C}_4\text{H}_9\text{S})_{12}(\text{NO}_3)_2\text{Br}]^{2+}$    | 1553.897 | 1553.894 |
| $[\text{Ag}_{18}(\text{C}_4\text{H}_9\text{S})_{12}(\text{NO}_3)_3\text{Br}]^{2+}$    | 1638.838 | 1638.839 |
| $[\text{Ag}_{19}(\text{C}_4\text{H}_9\text{S})_{12}(\text{NO}_3)_4\text{Br}]^{2+}$    | 1723.785 | 1723.786 |
| $[\text{Ag}_{20}(\text{C}_4\text{H}_9\text{S})_{12}(\text{NO}_3)_5\text{Br}]^{2+}$    | 1808.733 | 1808.731 |
| $[\text{Ag}_{21}(\text{C}_4\text{H}_9\text{S})_{12}(\text{NO}_3)_6\text{Br}]^{2+}$    | 1893.681 | 1893.679 |
| $[\text{Ag}_{22}(\text{C}_4\text{H}_9\text{S})_{12}(\text{NO}_3)_7\text{Br}]^{2+}$    | 1978.626 | 1978.624 |
| $[\text{Ag}_{23}(\text{C}_4\text{H}_9\text{S})_{12}(\text{NO}_3)_8\text{Br}]^{2+}$    | 2063.574 | 2063.572 |
| $[\text{Ag}_{24}(\text{C}_4\text{H}_9\text{S})_{12}(\text{NO}_3)_9\text{Br}]^{2+}$    | 2148.516 | 2148.517 |
| $[\text{Ag}_{25}(\text{C}_4\text{H}_9\text{S})_{12}(\text{NO}_3)_{10}\text{Br}]^{2+}$ | 2233.468 | 2233.464 |
| $[\text{Ag}_{26}(\text{C}_4\text{H}_9\text{S})_{12}(\text{NO}_3)_{11}\text{Br}]^{2+}$ | 2318.405 | 2318.410 |
| $[\text{Ag}_{27}(\text{C}_4\text{H}_9\text{S})_{12}(\text{NO}_3)_{12}\text{Br}]^{2+}$ | 2404.357 | 2404.365 |
| $[\text{Ag}_{28}(\text{C}_4\text{H}_9\text{S})_{12}(\text{NO}_3)_{13}\text{Br}]^{2+}$ | 2488.297 | 2488.302 |
| $[\text{Ag}_{15}(\text{C}_4\text{H}_9\text{S})_8(\text{NO}_3)_5\text{Br}]^+$          | 2721.781 | 2721.772 |
| $[\text{Ag}_{16}(\text{C}_4\text{H}_9\text{S})_8(\text{NO}_3)_6\text{Br}]^+$          | 2891.657 | 2891.661 |
| $[\text{Ag}_{16}(\text{C}_4\text{H}_9\text{S})_8(\text{NO}_3)_7\text{Br}]^+$          | 2946.773 | 2946.787 |

**Fig. S26.** The comparison of observed and calculated isotopic patterns for the spectrum of **3** presented in Fig. S25.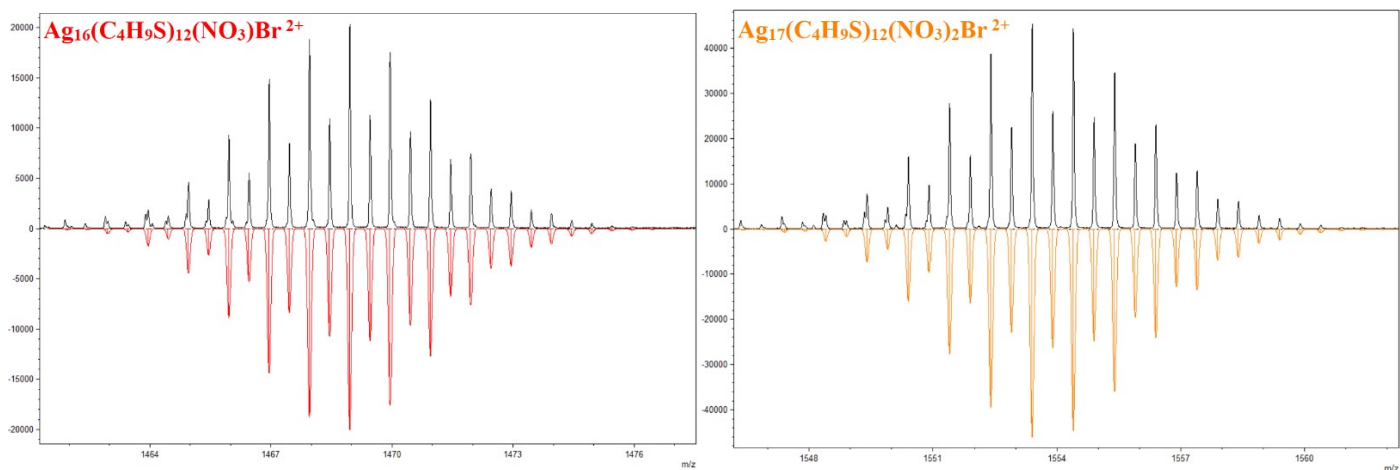

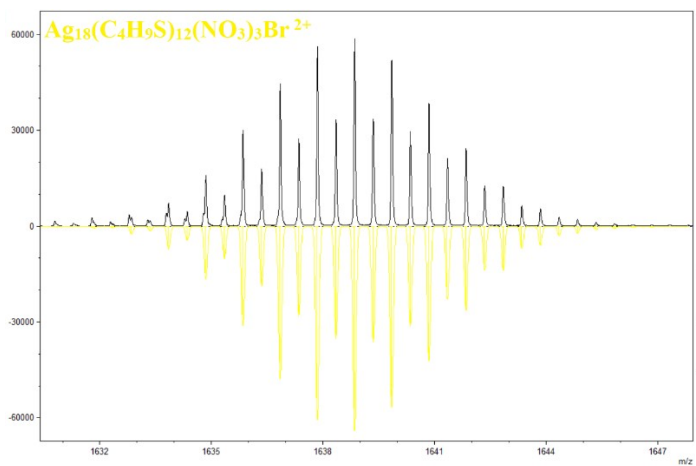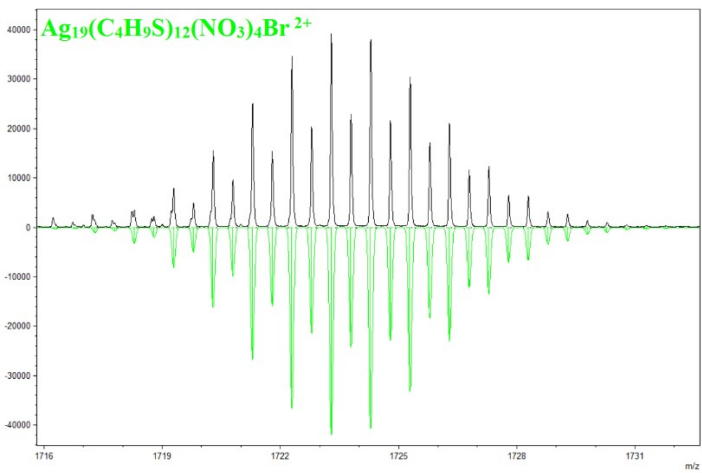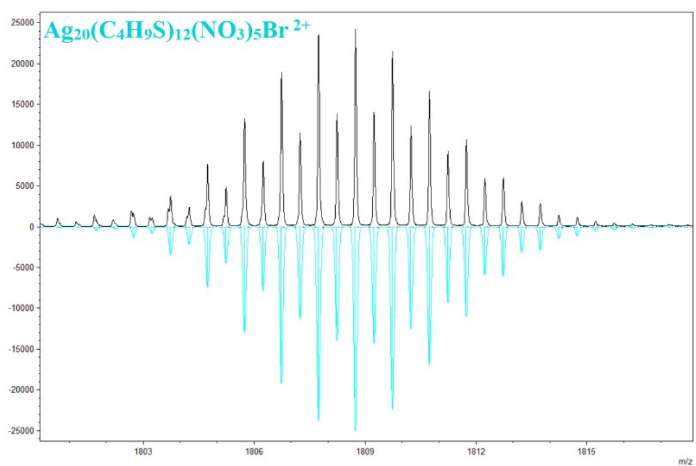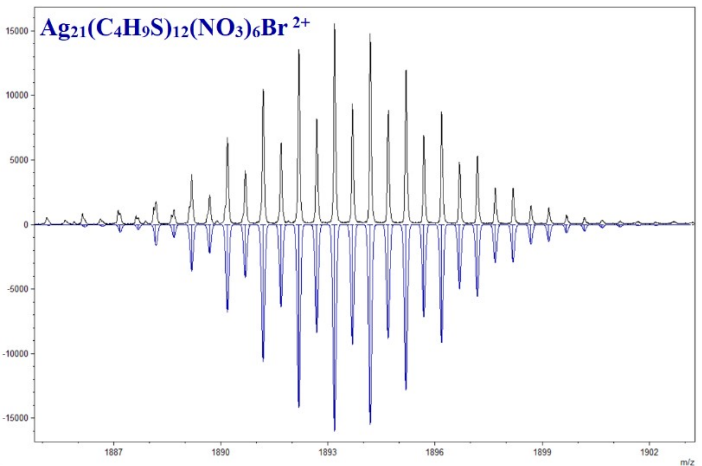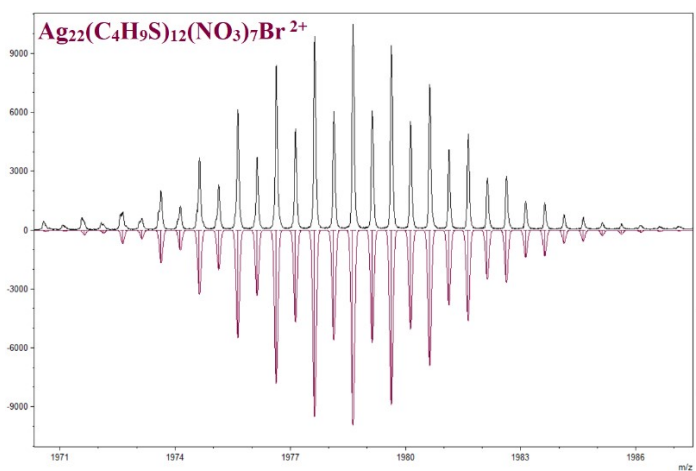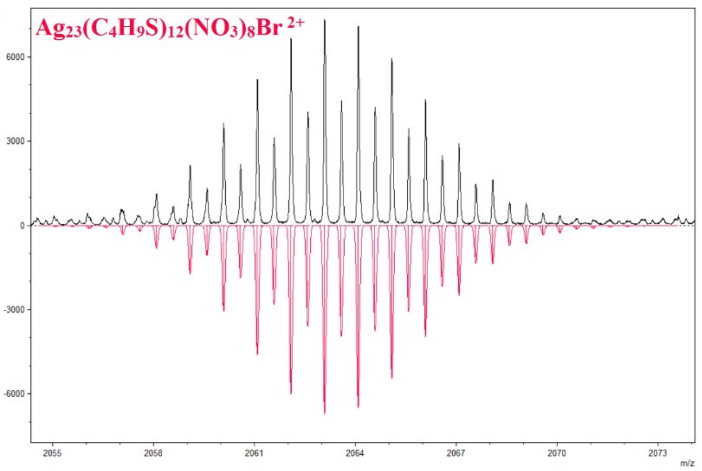

**Fig. S27.** Full HR-ESI-MS(+) spectrum of **3** in CH<sub>3</sub>CN solution after some period of time.

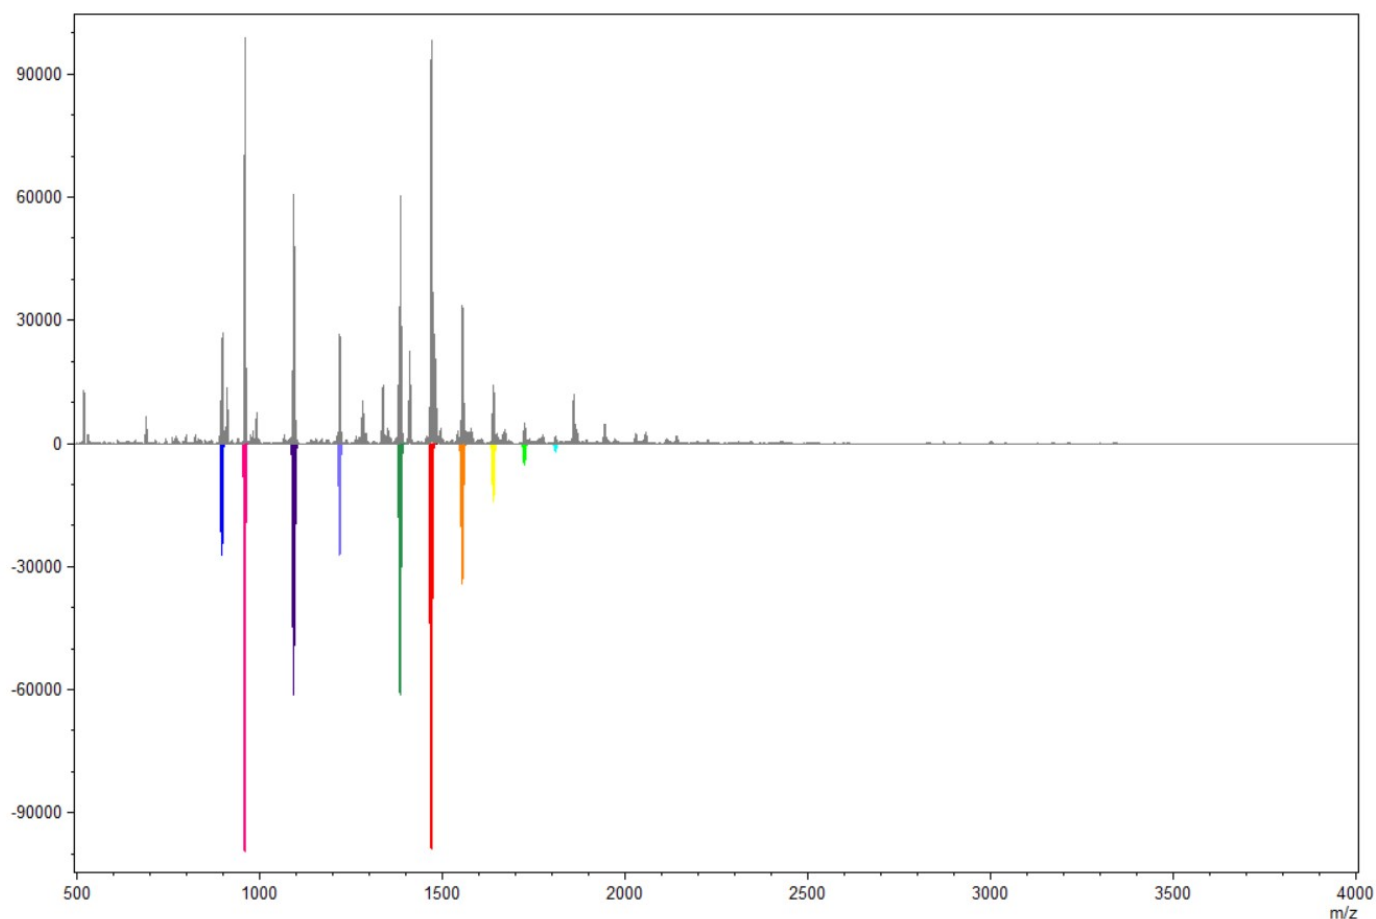

**Table S11.** Peak assignment for the spectrum of **3** presented in Fig. S27.

| cation                                                                                                              | m/z exp  | m/z calc |
|---------------------------------------------------------------------------------------------------------------------|----------|----------|
| [Ag <sub>10</sub> (C <sub>4</sub> H <sub>9</sub> S) <sub>8</sub> ] <sup>2+</sup>                                    | 896.193  | 896.195  |
| [Ag <sub>16</sub> (C <sub>4</sub> H <sub>9</sub> S) <sub>12</sub> (Br)] <sup>3+</sup>                               | 958.633  | 958.634  |
| [Ag <sub>6</sub> (C <sub>4</sub> H <sub>9</sub> S) <sub>5</sub> ] <sup>+</sup>                                      | 1092.638 | 1092.641 |
| [Ag <sub>20</sub> (C <sub>4</sub> H <sub>9</sub> S) <sub>15</sub> (Br) <sub>2</sub> ] <sup>3+</sup>                 | 1218.189 | 1218.189 |
| [Ag <sub>7</sub> (C <sub>4</sub> H <sub>9</sub> S) <sub>6</sub> ] <sup>+</sup>                                      | 1290.584 | 1290.588 |
| [Ag <sub>15</sub> (C <sub>4</sub> H <sub>9</sub> S) <sub>12</sub> Br] <sup>2+</sup>                                 | 1384.002 | 1384.001 |
| [Ag <sub>16</sub> (C <sub>4</sub> H <sub>9</sub> S) <sub>12</sub> (NO <sub>3</sub> )Br] <sup>2+</sup>               | 1468.944 | 1468.946 |
| [Ag <sub>17</sub> (C <sub>4</sub> H <sub>9</sub> S) <sub>12</sub> (NO <sub>3</sub> ) <sub>2</sub> Br] <sup>2+</sup> | 1553.896 | 1553.894 |
| [Ag <sub>18</sub> (C <sub>4</sub> H <sub>9</sub> S) <sub>12</sub> (NO <sub>3</sub> ) <sub>3</sub> Br] <sup>2+</sup> | 1638.834 | 1638.839 |
| [Ag <sub>19</sub> (C <sub>4</sub> H <sub>9</sub> S) <sub>12</sub> (NO <sub>3</sub> ) <sub>4</sub> Br] <sup>2+</sup> | 1723.792 | 1723.786 |
| [Ag <sub>20</sub> (C <sub>4</sub> H <sub>9</sub> S) <sub>12</sub> (NO <sub>3</sub> ) <sub>5</sub> Br] <sup>2+</sup> | 1808.732 | 1808.731 |

**Fig. S28.** The comparison of observed and calculated isotopic patterns for the spectrum of **3** presented in Fig. S27.

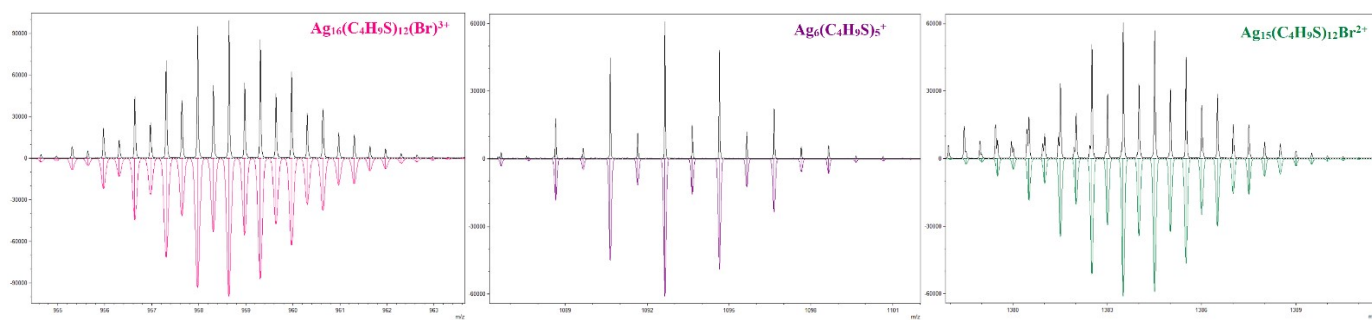

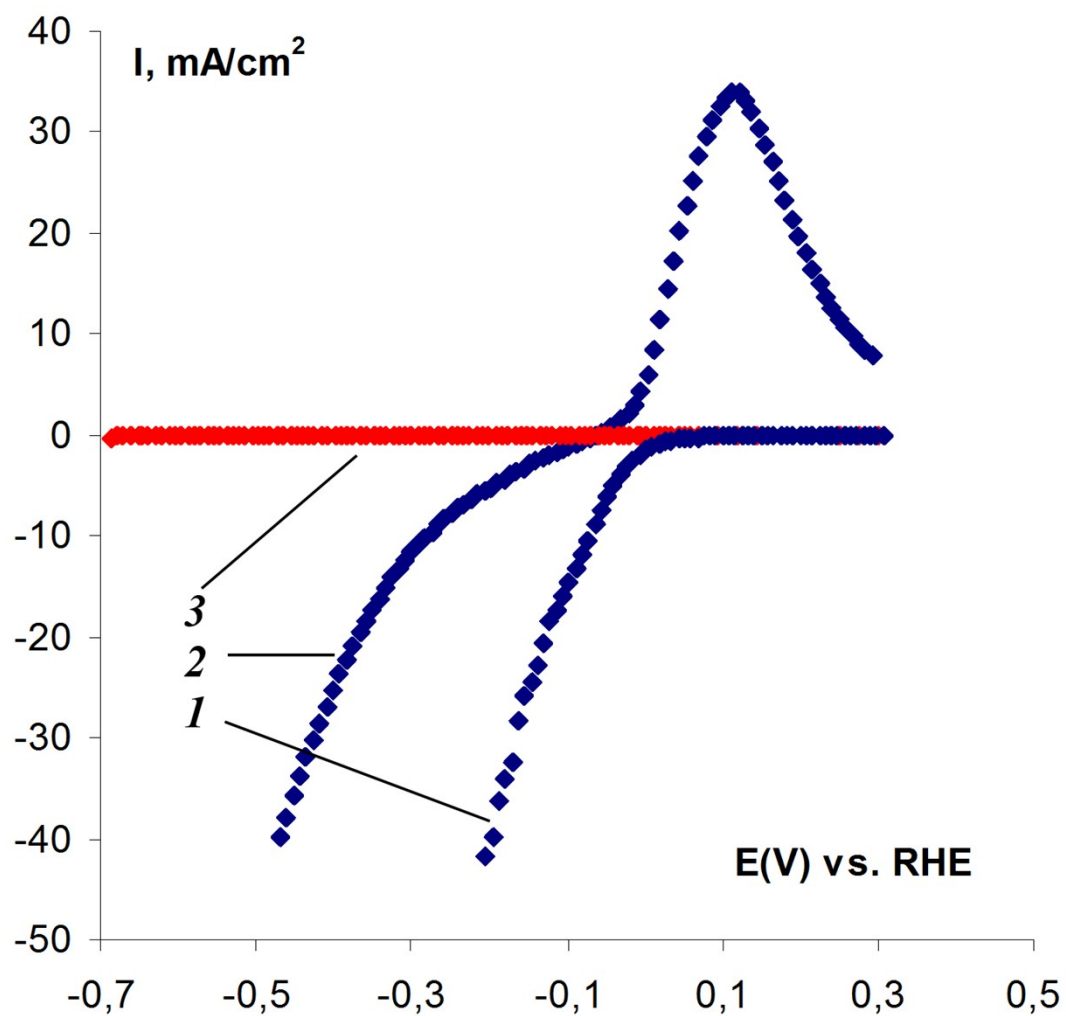

**Fig. S29.** Linear potential sweep (LRS) in the cathode region with **m-Ag<sub>2</sub>S** material fixed on the surface (1), Ag<sub>2</sub>S (2), blank 0.5 M H<sub>2</sub>SO<sub>4</sub> solution (3).

## Degradation

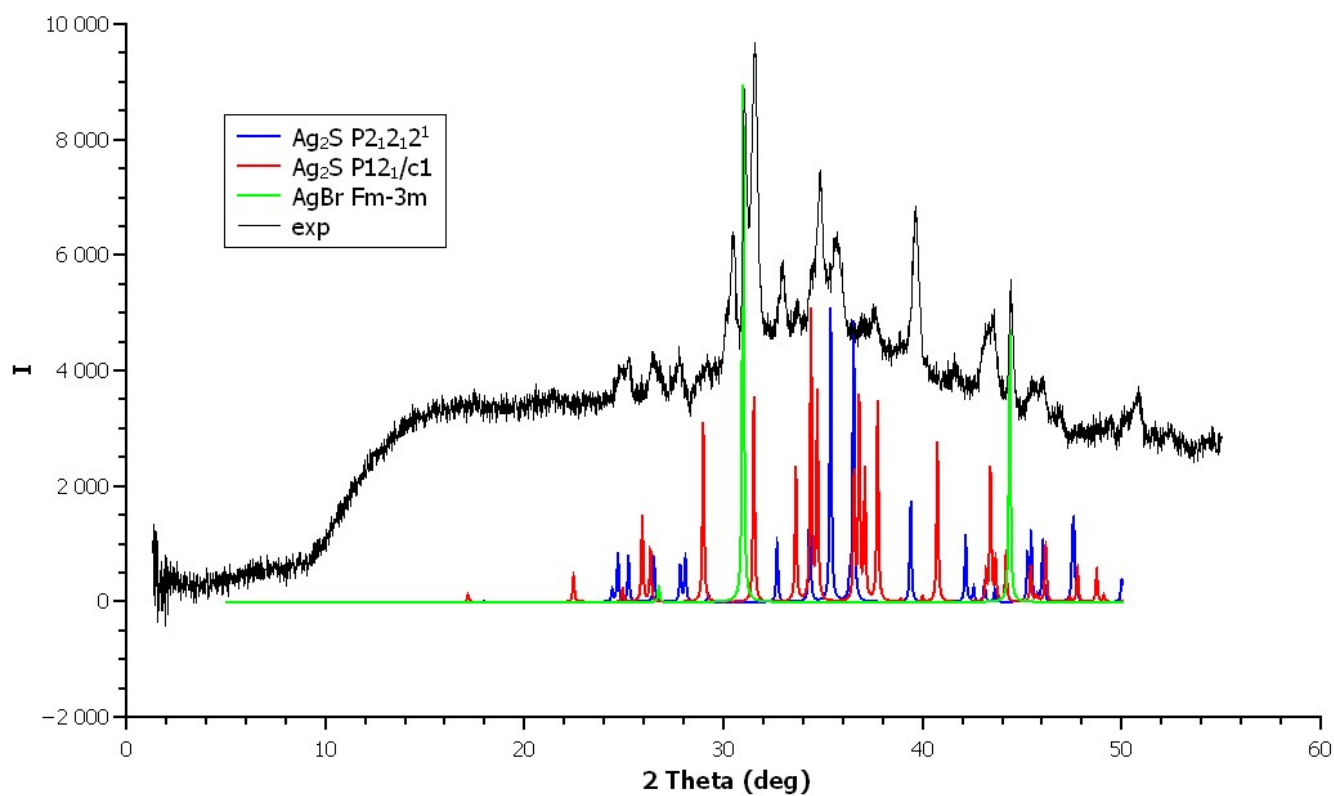

**Fig. S30.** XRPD of  $m\text{-Ag}_2\text{S}$ .

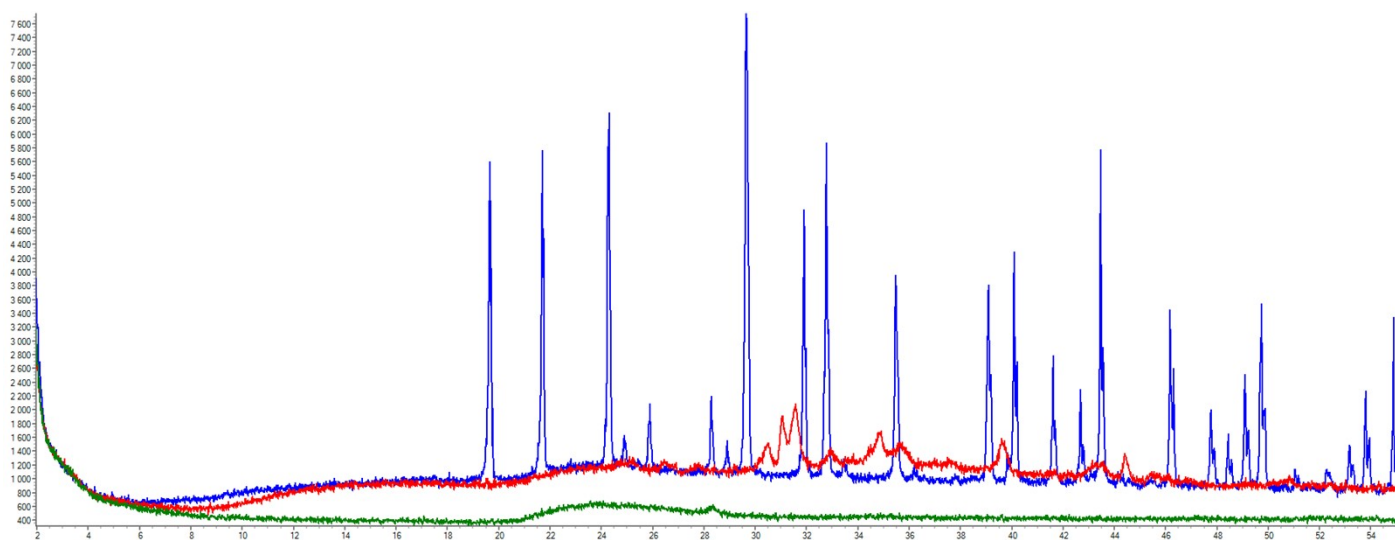

**Fig. S31.** XRPD patterns of  $m\text{-Ag}_2\text{S}$  (red),  $\text{AgNO}_3$  (blue) and holder (green).

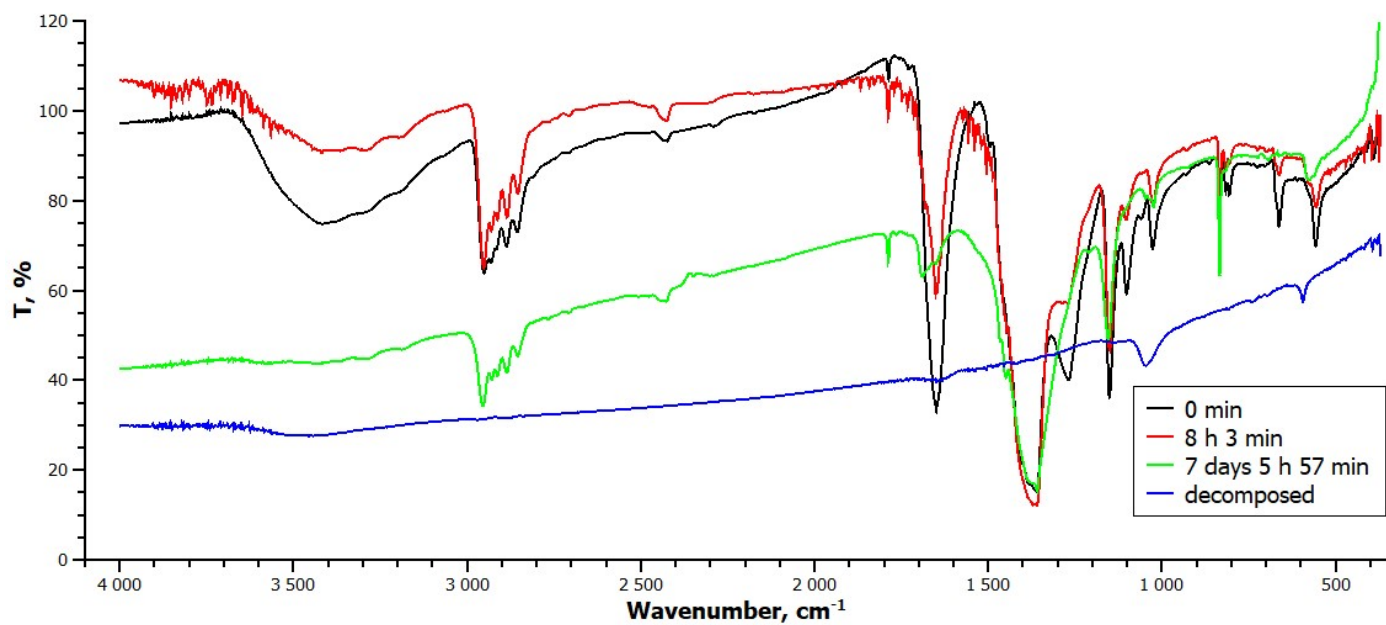

**Fig. S32.** The comparison of FTIR spectra during the decomposition of **3**.

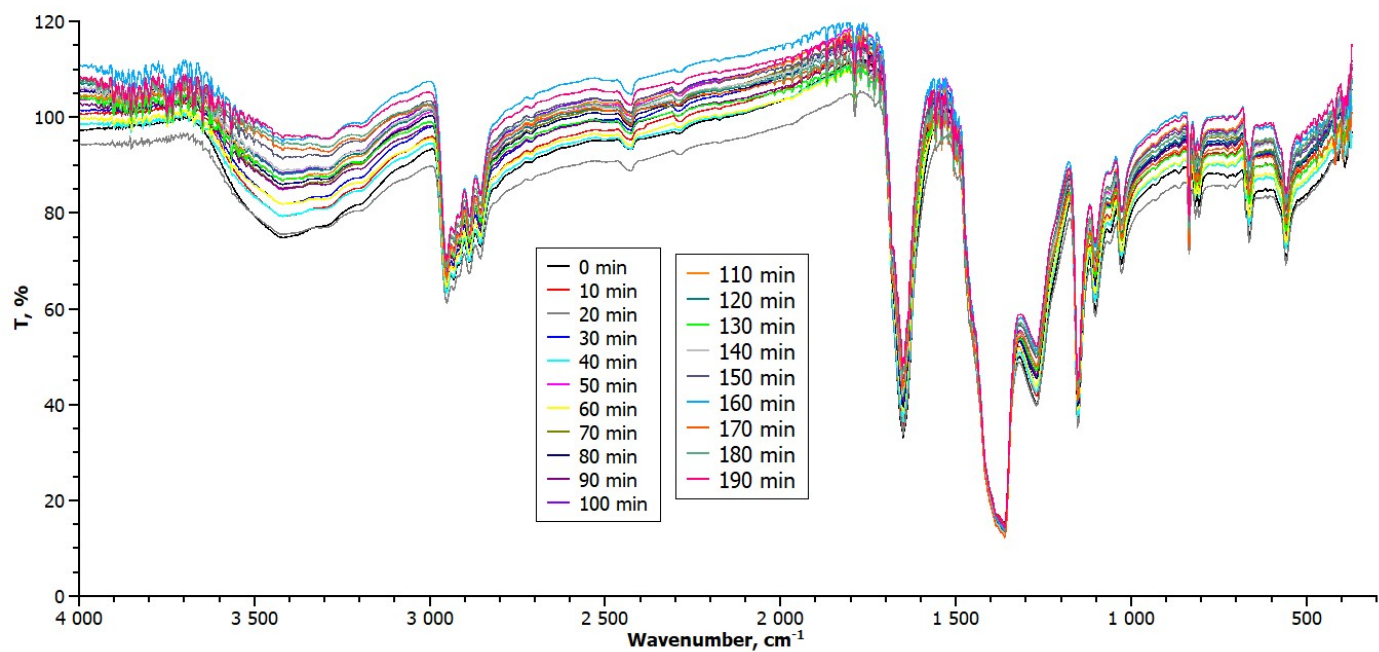

**Fig. S33.** The degradation of **3** in KBr pellet monitoring with FTIR.

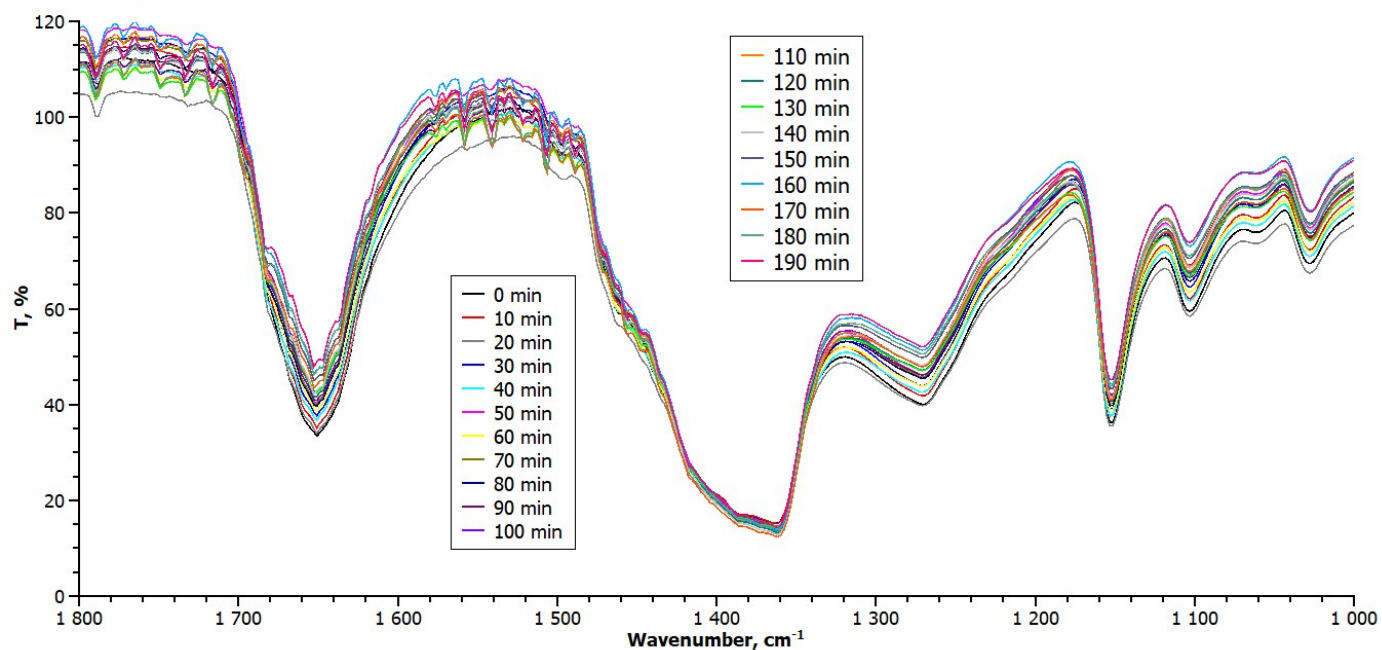

**Fig. 34.** The degradation of **3** in KBr pellet monitoring with FTIR (zoom 1800 – 1000  $\text{cm}^{-1}$ ).



## Microscopy

Surface morphology observation was carried out using a field-emission scanning electron microscope JEOL JSM 6700F (Jeol, Japan). The determination of elemental composition was studied with a Quantax 200 (Bruker, Germany) analyzer for X-ray energy dispersive spectroscopy (EDX).

The results of EDX analysis carried out at various points revealed that the sample contains elements, the characteristic spectra of which are shown in Fig. S29, and detailed information on their quantitative content is presented in Tables S12, S13.

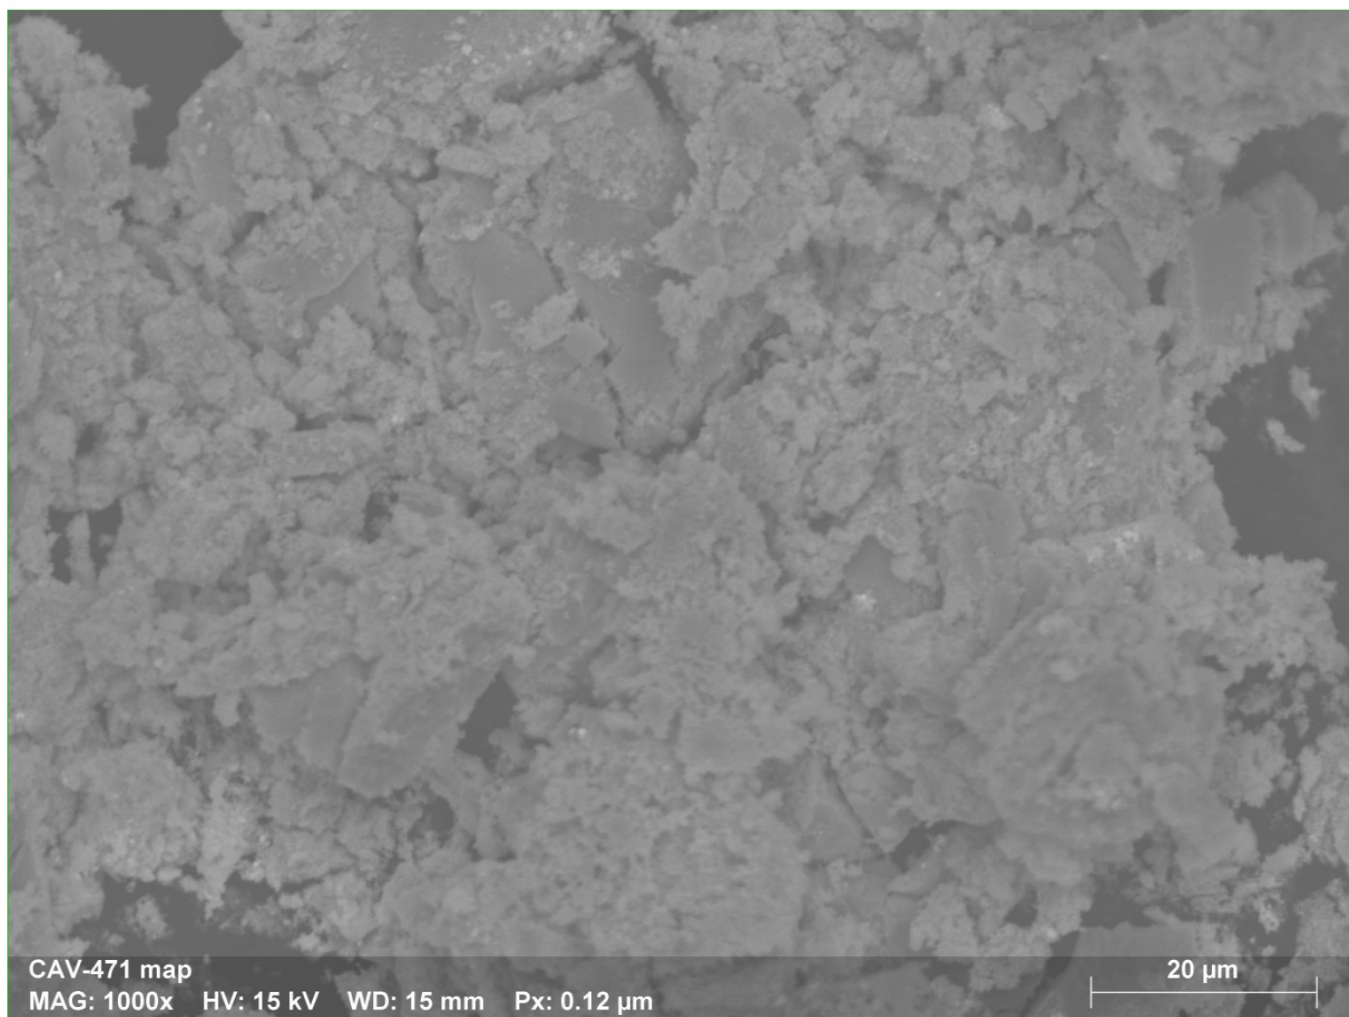

**Fig. S35.** SEM-image of **m-Ag<sub>2</sub>S** sample surface morphology.

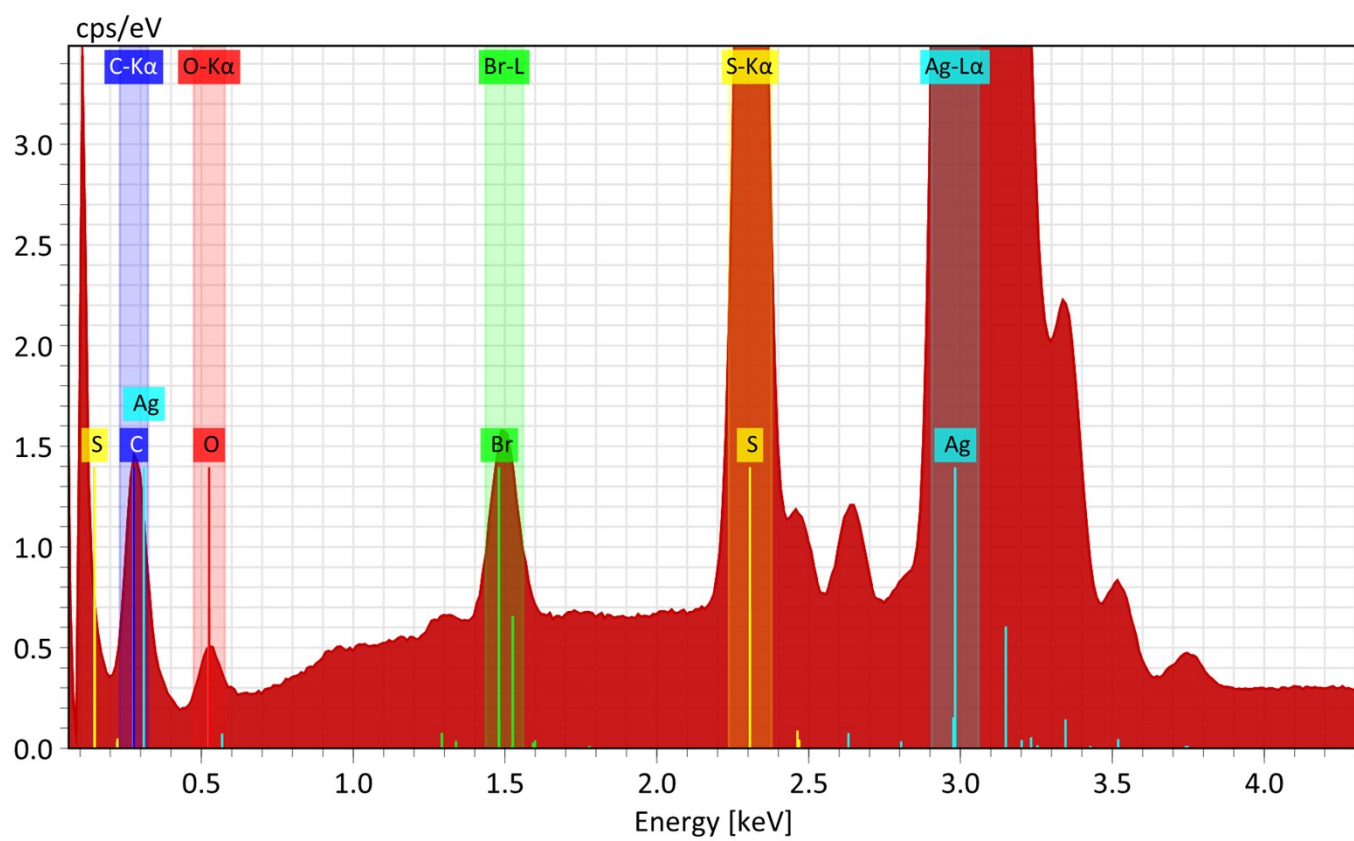

**Fig. S36.** Energy dispersive spectra for sample presented in Fig. S35.

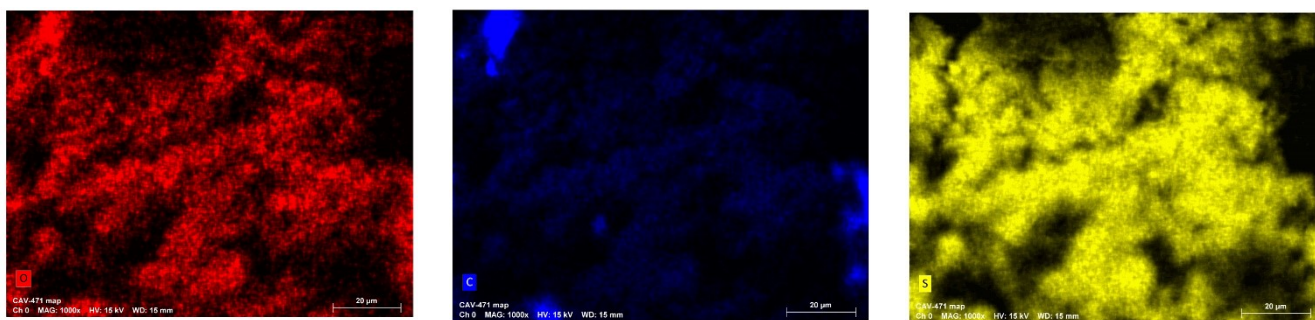

**Fig. S37.** EDX-mapping of the sample from Fig. S35.

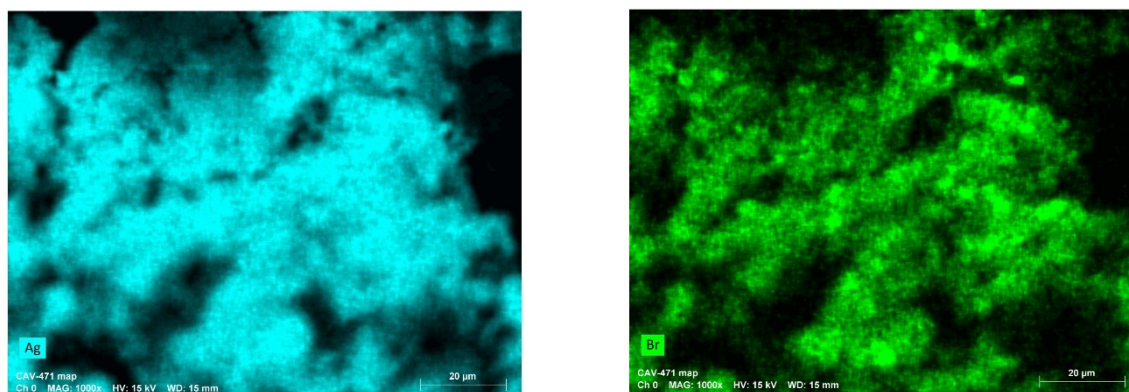

**Table S12.** Elemental composition of the sample.

| Element | At. No. | Netto      | Mass [%]      | Mass Norm. [%] | Atom [%]      | abs. error [%]<br>(1 sigma) | rel. error [%]<br>(1 sigma) |
|---------|---------|------------|---------------|----------------|---------------|-----------------------------|-----------------------------|
| Oxygen  | 8       | 19439      | 2.49          | 2.28           | 9.33          | 0.35                        | 13.87                       |
| Carbon  | 6       | 48969      | 3.54          | 3.24           | 17.65         | 0.44                        | 12.51                       |
| Sulfur  | 16      | 623414     | 11.62         | 10.65          | 21.70         | 0.43                        | 3.74                        |
| Silver  | 47      | 2543107    | 88.73         | 81.29          | 49.25         | 2.79                        | 3.15                        |
| Bromine | 35      | 77706      | 2.76          | 2.53           | 2.07          | 0.15                        | 5.58                        |
|         |         | <b>Sum</b> | <b>109.15</b> | <b>100.00</b>  | <b>100.00</b> |                             |                             |



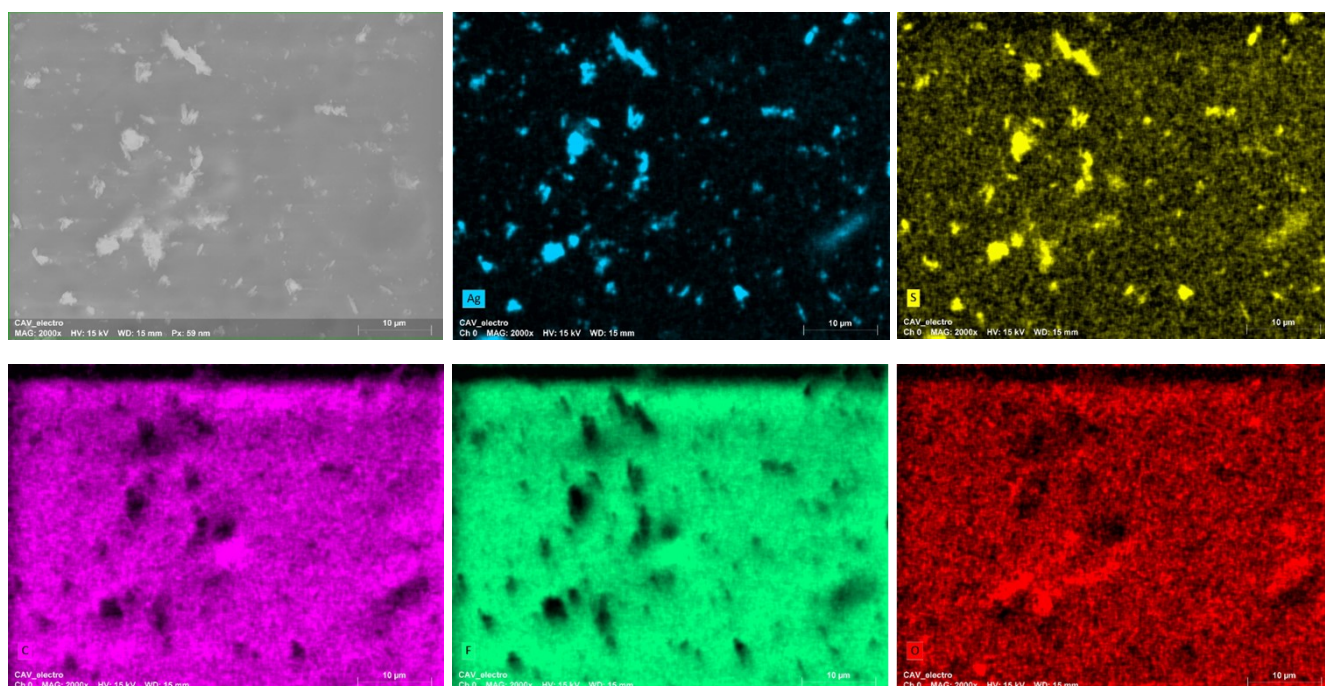

**Fig. S38.** EDX-mapping of the **m-Ag<sub>2</sub>S-cat** sample from Fig. 7b.

**Table S13.** Elemental composition of the sample from Fig. 7b.

| Element    | At. No. | Netto   | Mass [%]      | Mass Norm. [%] | Atom [%]      | abs. error [%]<br>(1 sigma) | rel. error [%]<br>(1 sigma) |
|------------|---------|---------|---------------|----------------|---------------|-----------------------------|-----------------------------|
| Carbon     | 6       | 539028  | 27.61         | 27.61          | 38.87         | 2.94                        | 10.64                       |
| Oxygen     | 8       | 61819   | 2.18          | 2.18           | 2.30          | 0.28                        | 12.76                       |
| Sulfur     | 16      | 254079  | 2.76          | 2.76           | 1.46          | 0.12                        | 4.44                        |
| Silver     | 47      | 176100  | 3.64          | 3.64           | 0.57          | 0.14                        | 3.82                        |
| Fluorine   | 9       | 3023961 | 63.81         | 63.81          | 56.80         | 6.55                        | 10.27                       |
| <b>Sum</b> |         |         | <b>100.00</b> | <b>100.00</b>  | <b>100.00</b> |                             |                             |

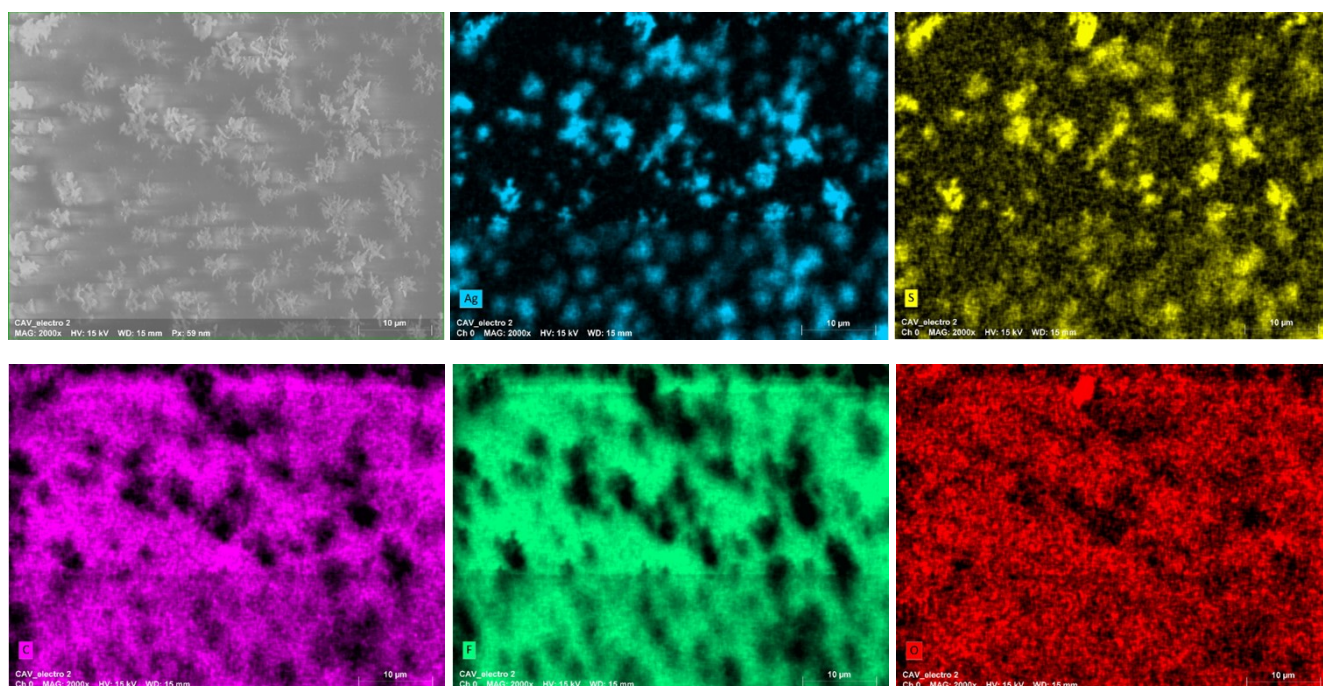

**Fig. S39.** EDX-mapping of the **m-Ag<sub>2</sub>S-cat** sample from Fig. 7c.

**Table S14.** Elemental composition of the sample from Fig. 7c.

| Element  | At. No. | Netto      | Mass [%]     | Mass Norm. [%] | Atom [%]      | abs. error [%] (1 sigma) | rel. error [%] (1 sigma) |
|----------|---------|------------|--------------|----------------|---------------|--------------------------|--------------------------|
| Carbon   | 6       | 526876     | 24.32        | 26.19          | 38.26         | 2.59                     | 10.65                    |
| Oxygen   | 8       | 50368      | 1.74         | 1.88           | 2.06          | 0.23                     | 13.22                    |
| Sulfur   | 16      | 272398     | 2.78         | 2.99           | 1.64          | 0.12                     | 4.43                     |
| Silver   | 47      | 342520     | 6.85         | 7.38           | 1.20          | 0.24                     | 3.49                     |
| Fluorine | 9       | 2736956    | 57.15        | 61.56          | 56.85         | 5.88                     | 10.29                    |
|          |         | <b>Sum</b> | <b>92.84</b> | <b>100.00</b>  | <b>100.00</b> |                          |                          |



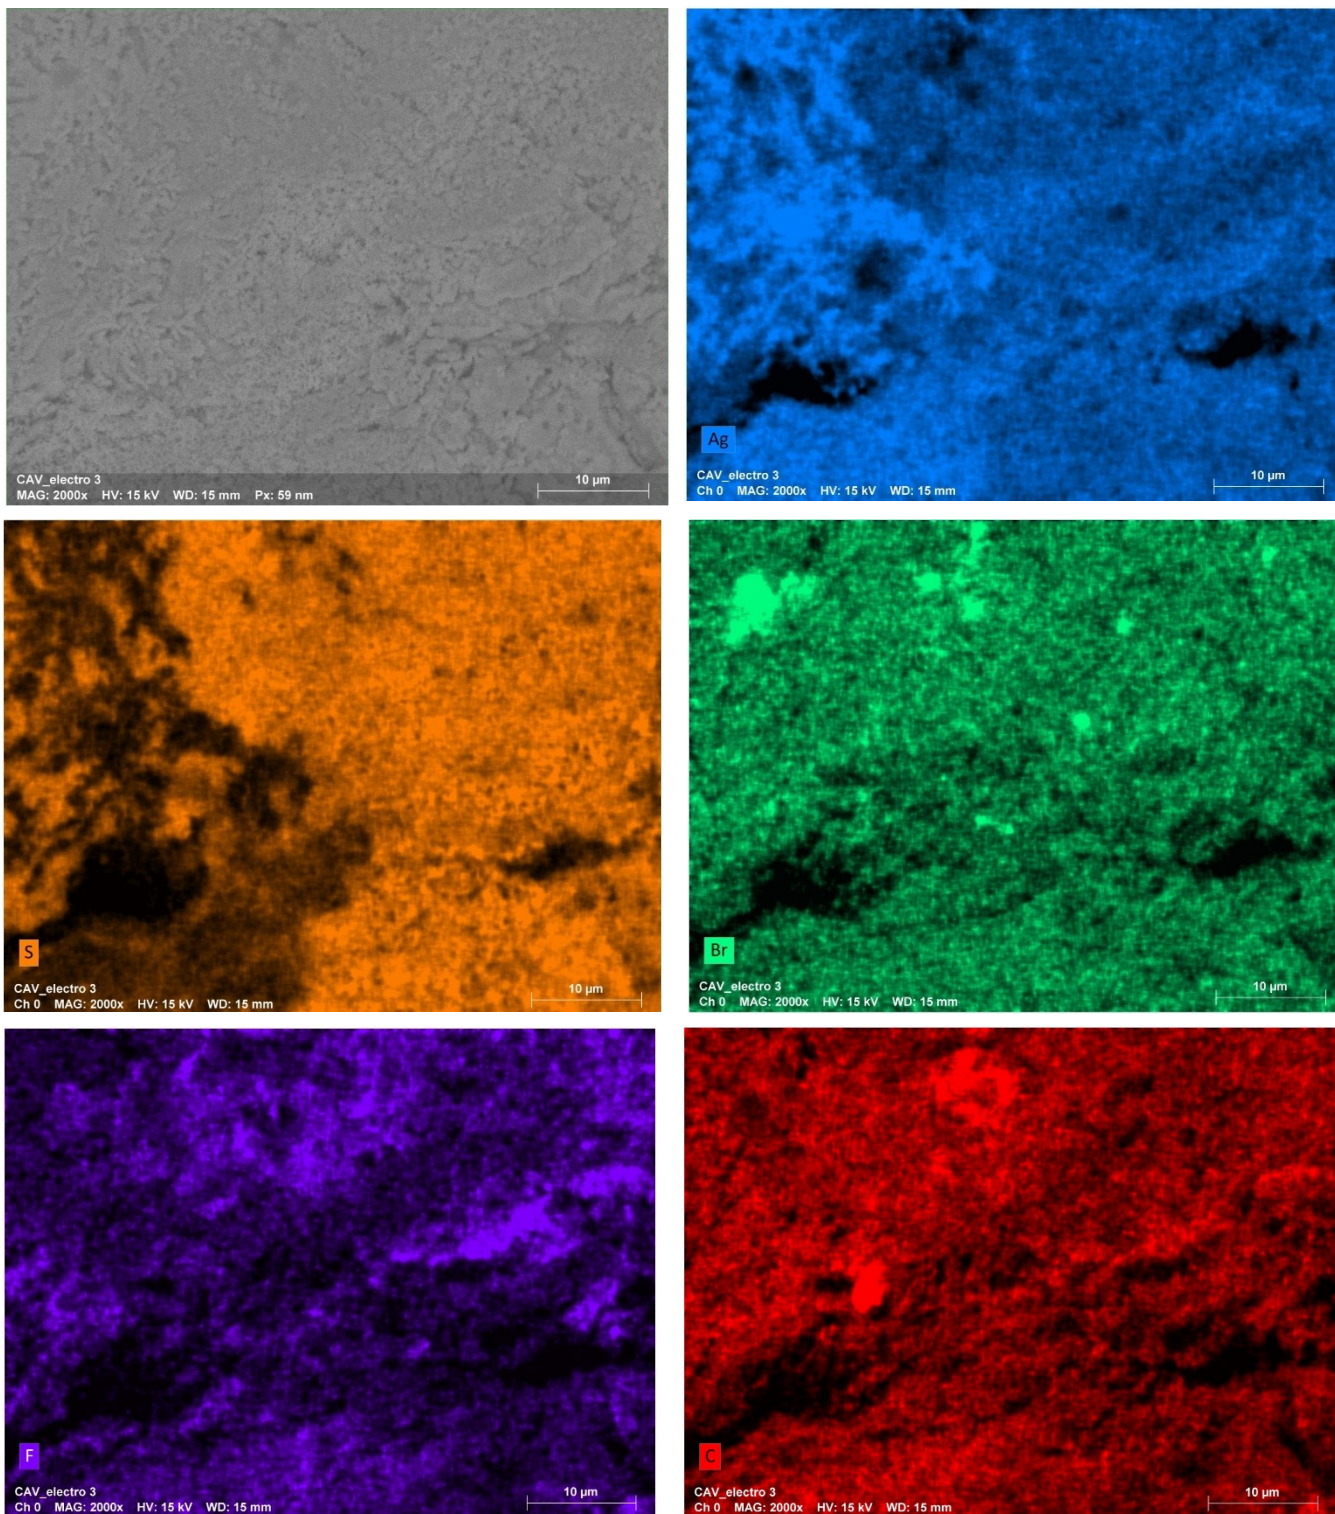

**Fig. S40.** A part of mapping for another area of  $m\text{-Ag}_2\text{S-cat}$

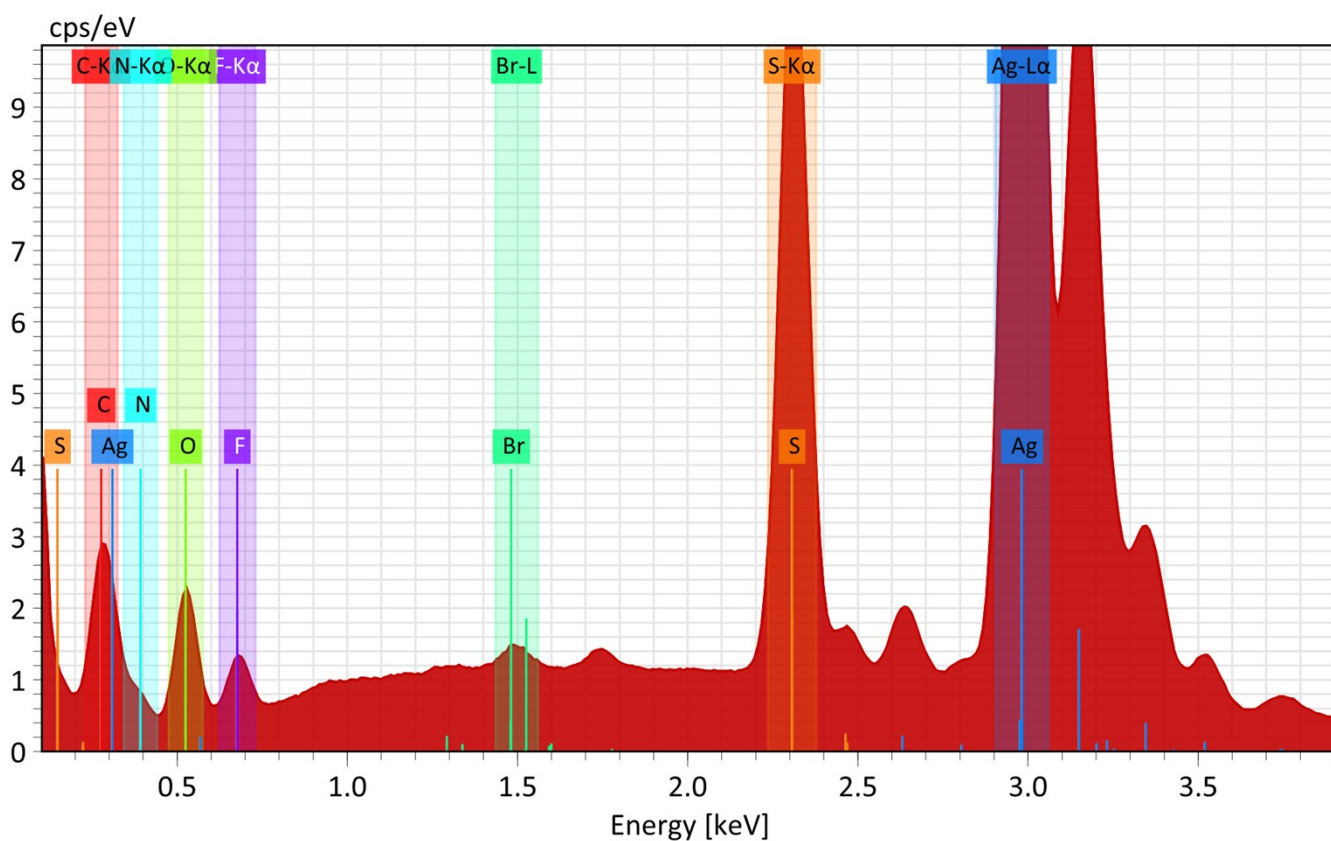

Fig. S41. Energy profile elemental analysis.

| Element  | At. No. | Netto      | Mass [%]     | Mass Norm. [%] | Atom [%]      | abs. error [%]<br>(1 sigma) | rel. error [%]<br>(1 sigma) |
|----------|---------|------------|--------------|----------------|---------------|-----------------------------|-----------------------------|
| Silver   | 47      | 3673990    | 73.48        | 74.37          | 33.80         | 2.32                        | 3.15                        |
| Sulfur   | 16      | 884249     | 9.40         | 9.51           | 14.54         | 0.36                        | 3.79                        |
| Bromine  | 35      | 17038      | 0.32         | 0.32           | 0.20          | 0.04                        | 12.62                       |
| Fluorine | 9       | 51847      | 2.67         | 2.70           | 6.97          | 0.34                        | 12.69                       |
| Carbon   | 6       | 94026      | 3.56         | 3.60           | 14.71         | 0.43                        | 12.01                       |
| Oxygen   | 8       | 113021     | 7.83         | 7.93           | 24.29         | 0.90                        | 11.51                       |
| Nitrogen | 7       | 22261      | 1.55         | 1.57           | 5.48          | 0.22                        | 14.30                       |
|          |         | <b>Sum</b> | <b>98.81</b> | <b>100.00</b>  | <b>100.00</b> |                             |                             |

Table S15. Elemental composition of the sample.
